# Supplementary material for: Beyond apples and pears: sex-specific genetics of body fat percentage
Source: PubMed Central journal article supplement (PMC10585153; doi:10.3389/fendo.2023.1274791), 2023-10-05

# Supplementary Material

## Table of Contents:

|                                                                                                                                                                                                                                    | <b>Page</b> |
|------------------------------------------------------------------------------------------------------------------------------------------------------------------------------------------------------------------------------------|-------------|
| <b>Links to Supplementary Excel Files Males.xlsx and Females.xlsx</b>                                                                                                                                                              | 3           |
| <b>Supplementary Tables</b>                                                                                                                                                                                                        | 4           |
| <b>Table S1:</b> The list of medical treatment (Unique Data Identifier (UDI) 20003-0.0) that subjects on them were excluded from the analysis                                                                                      | 4           |
| <b>Table S2:</b> The GWAS used to extract association of SNPs with SHBG, testosterone, TG, HDL, T2D, CAD, VAT, ASAT, and GFAT                                                                                                      | 6           |
| <b>Table S3:</b> Subjects characteristics                                                                                                                                                                                          | 7           |
| <b>Table S4:</b> Association of covariates with BFP in males and females                                                                                                                                                           | 8           |
| <b>Table S5:</b> Correlation between covariates and BFP                                                                                                                                                                            | 9           |
| <b>Table S6:</b> Association of novel BFPAdj GWAS loci with MRI-derived ASAT, VAT and GFAT adjusted for BMI and height                                                                                                             | 10          |
| <b>Table S7:</b> Association of novel BFPAdj GWAS loci with BFP before and after including albumin, SHBG and testosterone, and their quadratic terms in the model as well as their association with albumin, SHBG and testosterone | 11          |
| <b>Table S8:</b> Estimated genetic causality proportion (gcp) using LCV model                                                                                                                                                      | 12          |
| <b>Table S9:</b> SNPs interacting with sex affecting BFPAdj                                                                                                                                                                        | 13          |
| <b>Table S10:</b> Independent SNPs interacting with sex affecting BFPAdj                                                                                                                                                           | 14          |
| <b>Table S11:</b> The SNPs associated with BFP in Lu et al 2016 paper                                                                                                                                                              | 15          |
| <b>Table S12:</b> Novel loci that are eQTLs based on GTEx v8                                                                                                                                                                       | 16          |
| <b>Table S13:</b> Association of rs7133378 & rs1716407 and rs56361048 & rs7258937 with BFPAdj in males when both SNPs were in the model                                                                                            | 20          |
| <b>Table S14:</b> Association of rs74841570 and rs11057402 with BFPAdj in females when both SNPs were in the model                                                                                                                 | 20          |
| <b>Supplementary Figures</b>                                                                                                                                                                                                       | 21          |
| <b>Figure S1:</b> Distribution of BFP in males and females                                                                                                                                                                         | 21          |
| <b>Figure S2:</b> Association of BFPAdj GWAS SNPs in the current analysis with SHBG in Ruth et al analysis in males (N = 193) and females (N = 174)                                                                                | 22          |
| <b>Figure S3:</b> Association of BFPAdj GWAS SNPs in the current analysis with testosterone in Ruth et al analysis in males and females                                                                                            | 23          |
| <b>Figure S4:</b> The effect sizes of independent BFPAdj GWAS loci in males (N = 193) and females (N = 174)                                                                                                                        | 24          |
| <b>Figure S5:</b> The p-values (-log <sub>10</sub> ) of independent BFPAdj GWAS loci in males (N = 193) and females (N = 174)                                                                                                      | 25          |
| <b>Figure S6:</b> Association of BFPAdj GWAS SNPs in the current analysis with BFP in Neale's round 2 GWAS results                                                                                                                 | 26          |
| <b>Figure S7:</b> Association of SNPs on Chr X with BFPAdj in males and females                                                                                                                                                    | 27          |

|                         |             |
|-------------------------|-------------|
| <b>References</b>       | <b>Page</b> |
| <b>Males MR Plots</b>   | 28          |
| <b>T2D</b>              | 29          |
| <b>CAD</b>              | 34          |
| <b>HDL</b>              | 39          |
| <b>TG</b>               | 44          |
| <b>Females MR Plots</b> | 49          |
| <b>T2D</b>              | 49          |
| <b>CAD</b>              | 54          |
| <b>HDL</b>              | 59          |
| <b>TG</b>               | 64          |

**Links to Supplementary Excel Files:**

**Males.xlsx:**

[https://docs.google.com/spreadsheets/d/1MeewUJ6-cG8vjDpnifpgpn4oPn8JN\\_mv/edit?usp=sharing&ouid=110612840906643856403&rtpof=true&sd=true](https://docs.google.com/spreadsheets/d/1MeewUJ6-cG8vjDpnifpgpn4oPn8JN_mv/edit?usp=sharing&ouid=110612840906643856403&rtpof=true&sd=true)

**Females.xlsx:**

<https://docs.google.com/spreadsheets/d/1hIT9ZWtstKA4hWpOpLU4uFfSsBwauGYd/edit?usp=sharing&ouid=110612840906643856403&rtpof=true&sd=true>

## Supplementary Tables

**Table S1:** The list of medical treatment (Unique Data Identifier (UDI) 20003-0.0) that subjects on them were excluded from the analysis

| Males                                                                                                                                                                                                                                                                                                                                                                                                                                                                                                                                                                                                                                                                                                                                                                                                                                                                                                                                                                                                                                                                                                                                                                                                                                                                                                                                                                                                                                                                                                                                                                                                                                                                                                                | Females                                                                                                                                                                                                                                                                                                                                                                                                                                                                                                                                                                                                                                                                                                                                                                                                                                                                                                                                                                                                                                                                                                                                                                                                                              |
|----------------------------------------------------------------------------------------------------------------------------------------------------------------------------------------------------------------------------------------------------------------------------------------------------------------------------------------------------------------------------------------------------------------------------------------------------------------------------------------------------------------------------------------------------------------------------------------------------------------------------------------------------------------------------------------------------------------------------------------------------------------------------------------------------------------------------------------------------------------------------------------------------------------------------------------------------------------------------------------------------------------------------------------------------------------------------------------------------------------------------------------------------------------------------------------------------------------------------------------------------------------------------------------------------------------------------------------------------------------------------------------------------------------------------------------------------------------------------------------------------------------------------------------------------------------------------------------------------------------------------------------------------------------------------------------------------------------------|--------------------------------------------------------------------------------------------------------------------------------------------------------------------------------------------------------------------------------------------------------------------------------------------------------------------------------------------------------------------------------------------------------------------------------------------------------------------------------------------------------------------------------------------------------------------------------------------------------------------------------------------------------------------------------------------------------------------------------------------------------------------------------------------------------------------------------------------------------------------------------------------------------------------------------------------------------------------------------------------------------------------------------------------------------------------------------------------------------------------------------------------------------------------------------------------------------------------------------------|
| <ol style="list-style-type: none"> <li>1. anastrozole</li> <li>2. arimidex 1mg tablet</li> <li>3. buserelin</li> <li>4. buserelin product</li> <li>5. clomid 50mg tablet</li> <li>6. conjugated oestrogens 0.3mg / medroxyprogesterone 1.5mg tab</li> <li>7. cyclogest 200mg suppository</li> <li>8. cyprostat 50mg tablet</li> <li>9. cyproterone</li> <li>10. cyproterone acetate+ethinyloestradiol</li> <li>11. de-capeptyl sr 4.2mg injection (pdr for recon)+diluent</li> <li>12. deltahydrocortisone</li> <li>13. deltastab 1mg tablet</li> <li>14. dexamethasone</li> <li>15. drogenil</li> <li>16. dydrogesterone</li> <li>17. ethinylnortestosterone</li> <li>18. ethinyloestradiol product</li> <li>19. ethinyloestradiol+norethisterone acetate 20mcg/1mg tablet</li> <li>20. ethinyloestradiol+norgestimate 35mcg/250mcg tablet</li> <li>21. ethynodiol diacetate</li> <li>22. flutamide</li> <li>23. gonadorelin</li> <li>24. goserelin</li> <li>25. goserelin product</li> <li>26. hydrocortisone</li> <li>27. hydrocortisone product</li> <li>28. hydrocortistab 20mg tablet</li> <li>29. hydrocortone 10mg tablet</li> <li>30. letrozole</li> <li>31. leuprorelin</li> <li>32. levonorgestrel</li> <li>33. levonorgestrel product</li> <li>34. loestrin</li> <li>35. medrone 2mg tablet</li> <li>36. medroxyprogesterone</li> <li>37. mestranol+norethisterone 50micrograms/1mg tablet</li> <li>38. methylprednisolone</li> <li>39. methyltestosterone product</li> <li>40. micronor</li> <li>41. microval tablet</li> <li>42. nafarelin</li> <li>43. norethisterone</li> <li>44. norethisterone product</li> <li>45. norgeston tablet</li> <li>46. noriday</li> <li>47. norinyl-1 tablet</li> </ol> | <ol style="list-style-type: none"> <li>1. methyltestosterone product</li> <li>2. testotop tts 15mg transdermal patch</li> <li>3. yohimbine/pemoline/methyltestosterone</li> <li>4. testosterone product</li> <li>5. primoteston depot 250mg/1ml oily injection</li> <li>6. testoderm 6mg/24hours transdermal patch</li> <li>7. testogel 50mg gel 5g sachet</li> <li>8. cyprostat 50mg tablet</li> <li>9. flutamide</li> <li>10. drogenil</li> <li>11. anastrozole</li> <li>12. arimidex 1mg tablet</li> <li>13. letrozole</li> <li>14. cyproterone</li> <li>15. cyproterone acetate+ethinyloestradiol</li> <li>16. cyproterone acetate+ethinylestradiol</li> <li>17. dydrogesterone</li> <li>18. proscar 5mg tablet</li> <li>19. clomid 50mg tablet</li> <li>20. medrone 2mg tablet</li> <li>21. prednisone</li> <li>22. prednisolone</li> <li>23. prednesol 5mg tablet</li> <li>24. hydrocortistab 20mg tablet</li> <li>25. hydrocortone 10mg tablet</li> <li>26. methylprednisolone</li> <li>27. prednisolone product</li> <li>28. hydrocortisone</li> <li>29. deltastab 1mg tablet</li> <li>30. precortisyl 1mg tablet</li> <li>31. deltahydrocortisone</li> <li>32. hydrocortisone product</li> <li>33. dexamethasone</li> </ol> |

|                                                                                                                                                                                                                                                                                                                                                                                                                                                                                                                                                                                                                                               |  |
|-----------------------------------------------------------------------------------------------------------------------------------------------------------------------------------------------------------------------------------------------------------------------------------------------------------------------------------------------------------------------------------------------------------------------------------------------------------------------------------------------------------------------------------------------------------------------------------------------------------------------------------------------|--|
| 48. noristerat 200mg/1ml oily injection<br>49. ortho-novin 1/50 tablet<br>50. precortisyl 1mg tablet<br>51. prednesol 5mg tablet<br>52. prednisolone<br>53. prednisolone product<br>54. prednisone<br>55. primoteston depot 250mg/1ml oily injection<br>56. progesterone product<br>57. proscar 5mg tablet<br>58. prostap sr 3.75mg injection (pdr for recon)+diluent+kit<br>59. suprefact 100micrograms nasal spray<br>60. testoderm 6mg/24hours transdermal patch<br>61. testogel 50mg gel 5g sachet<br>62. testosterone product<br>63. testotop tts 15mg transdermal patch<br>64. triptorelin<br>65. yohimbine/pemoline/methyltestosterone |  |
|-----------------------------------------------------------------------------------------------------------------------------------------------------------------------------------------------------------------------------------------------------------------------------------------------------------------------------------------------------------------------------------------------------------------------------------------------------------------------------------------------------------------------------------------------------------------------------------------------------------------------------------------------|--|

**Table S2:** The GWAS used to extract association of SNPs with SHBG, testosterone, TG, HDL, T2D, CAD, VAT, ASAT, and GFAT

| Trait                | First Author      | Ethnicity                                                                    | Includes UKBB | Sex Stratified | Subjects                          | Link to Download                                                                                                                                                                                                                               |
|----------------------|-------------------|------------------------------------------------------------------------------|---------------|----------------|-----------------------------------|------------------------------------------------------------------------------------------------------------------------------------------------------------------------------------------------------------------------------------------------|
| SHBG                 | Ruth et al (1)    | European                                                                     | Yes           | Yes            | 180,726 Males<br>189,473 Females  | Males: <a href="https://www.ebi.ac.uk/gwas/studies/GCST90012109">https://www.ebi.ac.uk/gwas/studies/GCST90012109</a><br>Females: <a href="https://www.ebi.ac.uk/gwas/studies/GCST90012107">https://www.ebi.ac.uk/gwas/studies/GCST90012107</a> |
| Testosterone         | Ruth et al (1)    | European                                                                     | Yes           | Yes            | 194,453 Males<br>230,454 Females  | Males: <a href="https://www.ebi.ac.uk/gwas/studies/GCST90012113">https://www.ebi.ac.uk/gwas/studies/GCST90012113</a><br>Females: <a href="https://www.ebi.ac.uk/gwas/studies/GCST90012112">https://www.ebi.ac.uk/gwas/studies/GCST90012112</a> |
| HDL & TG             | Graham et al (2)  | European 80%<br>East Asian 9%<br>African 6%<br>Hispanic 3%<br>South Asian 2% | Yes           | Yes            | 1,654,960<br>51% Females          | <a href="http://csg.sph.umich.edu/willer/public/glgc-lipids2021/results/sex_specific_summary_stats/">http://csg.sph.umich.edu/willer/public/glgc-lipids2021/results/sex_specific_summary_stats/</a>                                            |
| T2D                  | Mahajan et al (3) | European                                                                     | Yes           | No             | 74,124 Cases<br>824,006 Controls  | <a href="http://diagram-consortium.org/downloads.html">http://diagram-consortium.org/downloads.html</a><br>Mahajan.NatGen2022.DIAMANTE-EUR.sumstat.zip                                                                                         |
| CAD                  | Aragam et al (4)  | European                                                                     | Yes           | No             | 181,522 Cases<br>984,168 Controls | <a href="http://ftp.ebi.ac.uk/pub/databases/gwas/summary_statistics/GCS T90132001-GCST90133000/GCST90132314/">http://ftp.ebi.ac.uk/pub/databases/gwas/summary_statistics/GCS T90132001-GCST90133000/GCST90132314/</a>                          |
| GFAT, VAT & ASAT     | Agrawal et al (5) | European 87%                                                                 | Yes           | Yes            | 38,965<br>51% Females             | <a href="https://cvd.hugeamp.org/downloads.html#summary">https://cvd.hugeamp.org/downloads.html#summary</a>                                                                                                                                    |
| WHR adjusted for BMI | Pulit et al (6)   | European                                                                     | Yes           | Yes            | 315,284 Males<br>379,501 Females  | <a href="https://zenodo.org/record/1251813#.Y-u7InbMKU1">https://zenodo.org/record/1251813#.Y-u7InbMKU1</a>                                                                                                                                    |

**Table S3:** Subjects characteristics

|                                | <b>Males (N = 157,937)</b> |           | <b>Females (N = 154,337)</b> |           |
|--------------------------------|----------------------------|-----------|------------------------------|-----------|
|                                | <b>Mean</b>                | <b>SD</b> | <b>Mean</b>                  | <b>SD</b> |
| <b>Age (years)</b>             | 57.1                       | 8.1       | 56.3                         | 8.0       |
| <b>Albumin (g/L)</b>           | 45.5                       | 2.6       | 45.0                         | 2.6       |
| <b>SHBG (nmol/L)</b>           | 39.9                       | 16.7      | 61.8                         | 30.1      |
| <b>Testosterone (nmol/L)</b>   | 12.0                       | 3.7       | 1.1                          | 0.6       |
| <b>Body fat percentage (%)</b> | 25.3                       | 5.8       | 36.7                         | 6.9       |

**Table S4:** Association of covariates with BFP in males and females

|                                          | <b>Males</b> |           |          |                      | <b>Females</b> |           |          |                      |
|------------------------------------------|--------------|-----------|----------|----------------------|----------------|-----------|----------|----------------------|
|                                          | <b>Beta</b>  | <b>SE</b> | <b>P</b> | <b>R<sup>2</sup></b> | <b>Beta</b>    | <b>SE</b> | <b>P</b> | <b>R<sup>2</sup></b> |
| <b>Age</b>                               | 0.1559       | 0.0020    | <2E-16   | 0.034                | 0.1148         | 0.0002    | <2E-16   | 0.029                |
| <b>Centered Age<sup>2</sup></b>          | -0.0010      | 0.0002    | 1.04E-5  |                      | -0.0022        | 0.0003    | <2E-16   |                      |
| <b>Albumin</b>                           | -0.0562      | 0.0054    | <2E-16   | 0.004                | -0.4242        | 0.0060    | <2E-16   | 0.026                |
| <b>Centered Albumin<sup>2</sup></b>      | -0.0012      | 0.0012    | 0.33     |                      | 0.0135         | 0.0015    | <2E-16   |                      |
| <b>SHBG</b>                              | -0.0768      | 0.0013    | <2E-16   | 0.049                | -0.1142        | 0.0006    | <2E-16   | 0.183                |
| <b>Centered SHBG<sup>2</sup></b>         | 0.0005       | 0.00002   | <2E-16   |                      | 0.0007         | 0.00001   | <2E-16   |                      |
| <b>Testosterone</b>                      | -0.2755      | 0.005     | <2E-16   | 0.084                | 1.3180         | 0.0328    | <2E-16   | 0.006                |
| <b>Centered Testosterone<sup>2</sup></b> | 0.0121       | 0.0006    | <2E-16   |                      | -0.2535        | 0.0120    | <2E-16   |                      |
| <b>R<sup>2</sup></b>                     | <b>0.13</b>  |           |          |                      | <b>0.23</b>    |           |          |                      |

Multi-variable linear regression was used to test association of covariates with BFP.



**Table S5:** Correlation between covariates and BFP

**A.**

|                     | <b>BFP</b> | <b>Albumin</b> | <b>SHBG</b> | <b>Testosterone</b> |
|---------------------|------------|----------------|-------------|---------------------|
| <b>BFP</b>          |            | -0.06          | -0.21       | -0.28               |
| <b>Albumin</b>      | <1E-4      |                | -0.11       | 0.01                |
| <b>SHBG</b>         | <1E-4      | <1E-4          |             | 0.58                |
| <b>Testosterone</b> | <1E-4      | 3.15E-02       | <1E-4       |                     |

**B.**

|                     | <b>BFP</b> | <b>Albumin</b> | <b>SHBG</b> | <b>Testosterone</b> |
|---------------------|------------|----------------|-------------|---------------------|
| <b>BFP</b>          |            | -0.16          | -0.43       | 0.07                |
| <b>Albumin</b>      | <1E-5      |                | 0.00        | 0.02                |
| <b>SHBG</b>         | <1E-5      | 0.46           |             | -0.02               |
| <b>Testosterone</b> | <1E-5      | <1E-5          | <1E-5       |                     |

A: Males, B: Females

Above diagonal: Spearman correlation coefficient; Below diagonal: p-value

**Table S6:** Association of novel BFPAdj GWAS loci with MRI-derived ASAT, VAT and GFAT adjusted for BMI and height (5)

|     |            |             |    |          |       |        |         |        | Agrawal et al |       |        |       |        |        |
|-----|------------|-------------|----|----------|-------|--------|---------|--------|---------------|-------|--------|-------|--------|--------|
|     |            |             |    |          | Males |        | Females |        | ASAT          |       | VAT    |       | GFAT   |        |
| CHR | BP (HG19)  | SNP         | A0 | A1       | BETA  | LOG10P | BETA    | LOG10P | Beta          | p     | Beta   | p     | Beta   | p      |
| 1   | 106802195  | rs11184828  | A  | G        | -0.07 | 3.09   | -0.14   | 8.65   | -0.01         | 0.21  | 0.005  | 0.43  | -0.003 | 0.64   |
| 1   | 150055361  | rs116819476 | C  | T        | 0.17  | 2.79   | 0.33    | 7.39   | 0.006         | 0.71  | 0.008  | 0.78  | -0.007 | 0.83   |
| 1   | 222061973  | rs11577023  | T  | C        | -0.06 | 2.66   | -0.12   | 7.32   | -0.01         | 0.17  | -0.007 | 0.28  | 0.013  | 0.17   |
| 2   | 54881621   | rs2941584   | T  | C        | -0.04 | 1.26   | -0.12   | 7.68   | -0.014        | 0.059 | -0.006 | 0.58  | -0.003 | 0.62   |
| 2   | 101414496  | rs2309885   | C  | T        | 0.1   | 7.44   | 0.03    | 0.65   | -0.014        | 0.07  | -0.002 | 0.59  | 0.023  | 0.0011 |
| 3   | 30071380   | rs7426945   | A  | G        | 0.05  | 2.35   | 0.12    | 8.06   | 0.008         | 0.21  | -0.003 | 0.54  | -0.006 | 0.44   |
| 4   | 2405062    | rs35802140  | C  | G        | 0.07  | 1.79   | 0.19    | 8.73   | 0.005         | 0.71  | 0.016  | 0.083 | -0.005 | 0.66   |
| 10  | 126305434  | rs4962671   | T  | C        | -0.1  | 7.91   | -0.03   | 0.98   | 0.001         | 0.96  | 0.008  | 0.38  | -0.003 | 0.56   |
| 10  | 131430686  | rs524804    | G  | A        | -0.07 | 3.46   | -0.13   | 8.75   | -0.017        | 0.016 | 0.001  | 0.86  | 0.001  | 0.82   |
| 11  | 66820856   | rs117773425 | C  | A        | 0.39  | 7.68   | 0       | 0.01   | 0.031         | 0.25  | 0.006  | 0.75  | 0.38   | 0.22   |
| 13  | 76086882   | rs531470369 | C  | CTTTTTTT | 0.03  | 1.11   | 0.12    | 7.39   | -             | -     | -      | -     | -      | -      |
| 16  | 25247974   | rs151118254 | C  | T        | 0.17  | 0.85   | 0.73    | 7.42   | -0.001        | 0.93  | -0.006 | 0.9   | 0.009  | 0.78   |
| 19  | 47282245   | rs56385874  | C  | T        | 0.05  | 1.3    | 0.17    | 9.32   | 0.011         | 0.22  | -0.009 | 0.31  | 0.019  | 0.038  |
| 20  | 38490795   | rs768147154 | T  | TAGAG    | -0.12 | 8.1    | -0.06   | 1.77   | -0.009        | 0.34  | 0.008  | 0.25  | -0.016 | 0.062  |
| 20  | 55823762   | rs6127980   | G  | A        | 0.15  | 7.31   | 0.03    | 0.48   | -0.007        | 0.6   | -0.001 | 0.97  | 0.018  | 0.13   |
| 23  | 43,017,461 | rs5950969   | C  | T        | 0.10  | 7.46   | -0.02   | 0.25   | -             | -     | -      | -     | -      | -      |
| 23  | 83,562,659 | rs73505165  | G  | A        | 0.07  | 7.66   | -0.00   | 0.01   | -             | -     | -      | -     | -      | -      |

A0: reference allele, A1: Effect Allele, ASAT: Abdominal subcutaneous adipose tissue, VAT: Visceral adipose tissue, GFAT: Gluteofemoral adipose tissue

**Table S7:** Association of novel BFPAdj GWAS loci with BFP before and after including albumin, SHBG and testosterone, and their quadratic terms in the model as well as their association with albumin, SHBG and testosterone

| SNP         | CHR | BP (HG19)   | A1 | Sex | M0     |       |          | M1     |       |          | Albumin |       |          | SHBG   |       |          | Testosterone |       |          |
|-------------|-----|-------------|----|-----|--------|-------|----------|--------|-------|----------|---------|-------|----------|--------|-------|----------|--------------|-------|----------|
|             |     |             |    |     | BETA   | SE    | P        | BETA   | SE    | P        | BETA    | SE    | P        | BETA   | SE    | P        | BETA         | SE    | P        |
| rs11184828  | 1   | 106,802,195 | A  | F   | 0.121  | 0.027 | 7.40E-06 | 0.158  | 0.024 | 4.45E-11 | 0.013   | 0.010 | 0.20     | 0.269  | 0.120 | 2.49E-02 | 0.000        | 0.002 | 0.99     |
| rs116819476 | 1   | 150,055,361 | T  | F   | 0.272  | 0.076 | 3.38E-04 | 0.300  | 0.067 | 8.54E-06 | -0.042  | 0.029 | 0.15     | 0.315  | 0.337 | 0.35     | 0.002        | 0.006 | 0.80     |
| rs11577023  | 1   | 222,061,973 | C  | F   | -0.109 | 0.027 | 4.16E-05 | -0.107 | 0.024 | 5.92E-06 | 0.022   | 0.010 | 2.62E-02 | -0.077 | 0.118 | 0.52     | -0.001       | 0.002 | 0.62     |
| rs2941584   | 2   | 54,881,621  | T  | F   | 0.133  | 0.026 | 3.31E-07 | 0.127  | 0.023 | 4.25E-08 | -0.012  | 0.010 | 0.23     | 0.001  | 0.116 | 1.00     | 0.000        | 0.002 | 0.84     |
| rs2309885   | 2   | 101,414,496 | T  | M   | 0.095  | 0.021 | 3.63E-06 | 0.095  | 0.019 | 1.02E-06 | -0.004  | 0.009 | 0.62     | 0.036  | 0.058 | 0.54     | -0.010       | 0.013 | 0.43     |
| rs7426945   | 3   | 30,071,380  | A  | F   | -0.126 | 0.024 | 2.10E-07 | -0.115 | 0.022 | 1.03E-07 | 0.013   | 0.009 | 0.17     | 0.034  | 0.108 | 0.75     | 0.002        | 0.002 | 0.35     |
| rs35802140  | 4   | 2,405,062   | G  | F   | 0.142  | 0.038 | 2.14E-04 | 0.181  | 0.034 | 1.09E-07 | 0.011   | 0.015 | 0.45     | 0.310  | 0.171 | 0.07     | 0.001        | 0.003 | 0.81     |
| rs4962671   | 10  | 126,305,434 | C  | M   | -0.117 | 0.020 | 9.32E-09 | -0.101 | 0.019 | 1.58E-07 | -0.005  | 0.009 | 0.56     | 0.114  | 0.058 | 0.05     | 0.019        | 0.013 | 0.15     |
| rs524804    | 10  | 131,430,686 | A  | F   | -0.116 | 0.025 | 2.51E-06 | -0.137 | 0.022 | 4.85E-10 | -0.013  | 0.009 | 0.16     | -0.063 | 0.110 | 0.57     | 0.000        | 0.002 | 0.91     |
| rs117773425 | 11  | 66,820,856  | A  | M   | 0.403  | 0.080 | 5.38E-07 | 0.395  | 0.076 | 2.18E-07 | -0.017  | 0.036 | 0.63     | -0.126 | 0.229 | 0.58     | 0.004        | 0.052 | 0.94     |
| rs531470369 | 13  | 76,086,882  | C  | F   | -0.117 | 0.027 | 1.14E-05 | -0.113 | 0.024 | 1.62E-06 | 0.015   | 0.010 | 0.15     | -0.013 | 0.118 | 0.91     | 0.005        | 0.002 | 4.38E-02 |
| rs151118254 | 16  | 25,247,974  | T  | F   | 0.638  | 0.190 | 7.77E-04 | 0.594  | 0.168 | 4.22E-04 | 0.070   | 0.072 | 0.33     | -0.738 | 0.843 | 0.38     | 0.007        | 0.016 | 0.65     |
| rs56385874  | 19  | 47,282,245  | T  | F   | 0.136  | 0.032 | 1.75E-05 | 0.162  | 0.028 | 9.94E-09 | 0.024   | 0.012 | 4.62E-02 | 0.093  | 0.141 | 0.51     | -0.002       | 0.003 | 0.45     |
| rs768147154 | 20  | 38,490,795  | T  | M   | 0.084  | 0.023 | 2.89E-04 | 0.111  | 0.022 | 5.19E-07 | -0.030  | 0.010 | 3.95E-03 | 0.187  | 0.066 | 4.75E-03 | 0.043        | 0.015 | 4.49E-03 |
| rs6127980   | 20  | 55,823,762  | A  | M   | 0.136  | 0.031 | 1.59E-05 | 0.147  | 0.030 | 7.26E-07 | -0.020  | 0.014 | 0.14     | 0.070  | 0.089 | 0.44     | 0.041        | 0.020 | 4.00E-02 |
| rs5950969   | 23  | 43,017,461  | C  | M   | -0.090 | 0.021 | 1.34E-05 | -0.097 | 0.020 | 6.95E-07 | 0.025   | 0.009 | 6.43E-03 | -0.058 | 0.059 | 0.32     | -0.015       | 0.013 | 0.26     |
| rs73505165  | 23  | 83,562,659  | G  | M   | -0.078 | 0.014 | 5.93E-08 | -0.075 | 0.014 | 3.84E-08 | 0.008   | 0.006 | 0.19     | 0.015  | 0.041 | 0.71     | 0.003        | 0.009 | 0.72     |

Linear regression was used to test association of SNPs with BFP, albumin, SHBG and testosterone.

M0: Age, Age<sup>2</sup>, PC1, PC2, PC3, PC4, PC5, PC6, PC7, PC8, PC9 and PC10 were included as covariates in the model.

M1: All covariates in M0 plus albumin, albumin<sup>2</sup>, SHBG, SHBG<sup>2</sup>, testosterone and testosterone<sup>2</sup> were included as covariates in the model.

Age, Age<sup>2</sup>, PC1, PC2, PC3, PC4, PC5, PC6, PC7, PC8, PC9 and PC10 were included as covariates in the models to test association of SNPs with albumin, SHBG and testosterone.

A1: Effect allele, M: Males, F: Females

**Table S8:** Estimated genetic causality proportion (gcp) using LCV model

| <b>Sex</b> | <b>Exposure</b> | <b>Outcome</b> | <b>Genetic correlation (SE)</b> | <b>gcp (SE)</b> |
|------------|-----------------|----------------|---------------------------------|-----------------|
| Male       | BFPAdj          | CAD            | 0.24 (0.03)                     | -0.65 (0.24)    |
| Male       | BFPAdj          | T2D            | 0.36 (0.04)                     | -0.04 (0.58)    |
| Male       | BFPAdj          | HDL            | -0.23 (0.04)                    | -0.69 (0.21)    |
| Male       | BFPAdj          | TG             | 0.06 (0.05)                     | -0.19 (0.14)    |
| Female     | BFPAdj          | CAD            | 0.21 (0.04)                     | -0.53 (0.31)    |
| Female     | BFPAdj          | T2D            | 0.32 (0.04)                     | -0.06 (0.53)    |
| Female     | BFPAdj          | HDL            | -0.20 (0.04)                    | 0.36 (0.30)     |
| Female     | BFPAdj          | TG             | 0.12 (0.04)                     | 0.09 (0.20)     |

**Table S9:** SNPs interacting with sex affecting BFPAdj

| CHR | BP (HG19)  | ID          | A0    | A1 | A1FREQ | INFO  | BETA   | SE    | LOG10P |
|-----|------------|-------------|-------|----|--------|-------|--------|-------|--------|
| 4   | 62,634,106 | rs754823863 | T     | C  | 0.999  | 0.730 | 3.600  | 0.650 | 7.52   |
| 8   | 36,794,458 | rs16885587  | C     | T  | 0.872  | 0.977 | 0.229  | 0.041 | 7.54   |
| 8   | 36,829,456 | rs61146997  | CTAAA | C  | 0.814  | 0.948 | 0.197  | 0.036 | 7.38   |
| 8   | 36,846,435 | rs75772194  | G     | A  | 0.836  | 0.999 | 0.202  | 0.037 | 7.36   |
| 8   | 36,847,115 | rs10110651  | C     | T  | 0.836  | 1.000 | 0.203  | 0.037 | 7.43   |
| 8   | 36,847,709 | rs10086016  | C     | T  | 0.836  | 1.000 | 0.204  | 0.037 | 7.49   |
| 8   | 36,848,038 | rs28735403  | C     | T  | 0.836  | 0.999 | 0.203  | 0.037 | 7.43   |
| 8   | 36,848,357 | rs16885613  | C     | T  | 0.836  | 0.999 | 0.203  | 0.037 | 7.42   |
| 8   | 36,849,946 | rs4286946   | G     | C  | 0.836  | 0.998 | 0.202  | 0.037 | 7.33   |
| 8   | 36,851,901 | rs10955009  | A     | C  | 0.836  | 0.998 | 0.203  | 0.037 | 7.44   |
| 8   | 36,853,213 | rs10096213  | T     | C  | 0.836  | 0.995 | 0.204  | 0.037 | 7.48   |
| 8   | 36,853,217 | rs10095380  | C     | G  | 0.836  | 0.995 | 0.204  | 0.037 | 7.48   |
| 10  | 70,975,897 | rs5030937   | T     | C  | 0.308  | 0.994 | -0.168 | 0.030 | 7.82   |
| 10  | 70,975,916 | rs5030938   | T     | C  | 0.308  | 0.994 | -0.167 | 0.030 | 7.80   |
| 10  | 70,976,833 | rs10762264  | A     | G  | 0.309  | 0.995 | -0.166 | 0.030 | 7.68   |
| 10  | 70,977,308 | rs10998647  | G     | T  | 0.308  | 0.995 | -0.166 | 0.030 | 7.66   |
| 10  | 70,977,395 | rs10998648  | C     | A  | 0.308  | 0.996 | -0.167 | 0.030 | 7.73   |
| 10  | 70,979,924 | rs10823318  | T     | A  | 0.309  | 0.996 | -0.166 | 0.030 | 7.67   |
| 10  | 70,982,136 | rs35696875  | TCA   | T  | 0.301  | 0.997 | -0.163 | 0.030 | 7.37   |
| 10  | 70,982,941 | rs4746822   | T     | C  | 0.301  | 0.999 | -0.163 | 0.030 | 7.38   |
| 10  | 70,983,629 | rs9663238   | G     | A  | 0.301  | 0.999 | -0.164 | 0.030 | 7.44   |
| 10  | 70,983,936 | rs35199395  | C     | G  | 0.301  | 0.998 | -0.164 | 0.030 | 7.45   |
| 10  | 70,985,267 | rs2394529   | C     | G  | 0.301  | 0.999 | -0.163 | 0.030 | 7.41   |
| 10  | 70,986,723 | rs9645500   | G     | T  | 0.301  | 1.000 | -0.164 | 0.030 | 7.47   |
| 17  | 7,568,925  | rs55745760  | T     | C  | 0.597  | 0.960 | -0.165 | 0.029 | 8.15   |

**Table S10:** Independent SNPs interacting with sex affecting BFPAdj

| CHR | BP (HG19)  | SNP         | Gene   | A0 | A1 | All (SNP x Sex Interaction) |      |       |      |        | Males  |      |       |      |        | Females |      |       |      |        |
|-----|------------|-------------|--------|----|----|-----------------------------|------|-------|------|--------|--------|------|-------|------|--------|---------|------|-------|------|--------|
|     |            |             |        |    |    | A1FREQ                      | INFO | BETA  | SE   | LOG10P | A1FREQ | INFO | BETA  | SE   | LOG10P | A1FREQ  | INFO | BETA  | SE   | LOG10P |
| 4   | 62,634,106 | rs754823863 | ADGRL3 | T  | C  | 0.999                       | 0.73 | 3.60  | 0.65 | 7.52   | 0.999  | 0.73 | -1.56 | 0.44 | 3.41   | 0.999   | 0.73 | 1.96  | 0.48 | 4.33   |
| 8   | 36,794,458 | rs16885587  | KCNU1  | C  | T  | 0.872                       | 0.98 | 0.23  | 0.04 | 7.54   | 0.872  | 0.98 | 0.01  | 0.03 | 0.09   | 0.872   | 0.98 | 0.22  | 0.03 | 12.07  |
| 10  | 70,975,897 | rs5030937   | HKDC1  | T  | C  | 0.308                       | 0.99 | -0.17 | 0.03 | 7.82   | 0.308  | 0.99 | 0.05  | 0.02 | 1.89   | 0.308   | 0.99 | -0.10 | 0.02 | 5.45   |
| 17  | 7,568,925  | rs55745760  | TP53   | T  | C  | 0.597                       | 0.96 | -0.17 | 0.03 | 8.15   | 0.597  | 0.96 | 0.01  | 0.02 | 0.11   | 0.596   | 0.96 | -0.16 | 0.02 | 12.97  |

**Table S11:** The SNPs associated with BFP in Lu et al 2016 paper (7)

| SNP       | CHR | BP (HG18)   | BP (HG19)   | Gene    | Males            |             | Females          |             |
|-----------|-----|-------------|-------------|---------|------------------|-------------|------------------|-------------|
|           |     |             |             |         | Top SNP          | BP (HG19)   | Top SNP          | BP (HG19)   |
| rs543874  | 1   | 176,156,103 | 177,889,480 | SEC16B  | rs539515         | 177,889,025 | rs543874         | 177,889,480 |
| rs6755502 | 2   | 625,721     | 635,721     | TMEM18  | rs4407278        | 648,607     | rs6751993        | 635,864     |
| rs6738627 | 2   | 165,252,696 | 165,544,450 | COBLL1  | rs1128249        | 165,528,624 | rs200472737*     | 165,544,573 |
| rs2943652 | 2   | 226,816,690 | 227,108,446 | IRS1    | rs2943650        | 227,105,921 | <b>No Signal</b> | -           |
| rs693839  | 13  | 79,856,289  | 80,958,288  | SPRY2   | <b>No Signal</b> | -           | <b>No Signal</b> | -           |
| rs4788099 | 16  | 28,763,228  | 28,855,727  | TUFM    | 16:28579915_GT_G | 28,579,915  | rs437564         | 28,818,037  |
| rs1558902 | 16  | 52,361,075  | 53,803,574  | FTO     | rs56094641*      | 53,806,453  | rs1421085        | 53,800,954  |
| rs9906944 | 17  | 44,446,419  | 47,091,420  | IGF2BP1 | <b>No Signal</b> | -           | <b>No Signal</b> | -           |
| rs6567160 | 18  | 55,980,115  | 57,829,135  | MC4R    | rs73455668       | 57,985,366  | rs11451426       | 60,189,009  |
| rs757318  | 19  | 18,681,308  | 18,820,308  | CRTC1   | <b>No Signal</b> | -           | <b>No Signal</b> | -           |
| rs6857    | 19  | 50,084,094  | 45,392,254  | TOMM40  | rs190712692      | 45,425,178  | rs7412           | 45,412,079  |
| rs3761445 | 22  | 36,925,357  | 38,595,411  | PLA2G6  | rs4821764        | 38,599,364  | rs4820325        | 38,599,978  |

\* There are other independent signals in the locus.

**Table S12:** Novel loci that are eQTLs based on GTEx v8

| Gencode Id         | Gene Symbol  | Variant Id             | SNP Id      | P-Value   | NES   | Tissue                                   |
|--------------------|--------------|------------------------|-------------|-----------|-------|------------------------------------------|
| ENSG00000266472.5  | MRPS21       | chr1_150083277_C_T_b38 | rs116819476 | 0.0000048 | 0.36  | Adipose - Visceral (Omentum)             |
| ENSG00000143369.14 | ECM1         | chr1_150083277_C_T_b38 | rs116819476 | 0.000085  | -0.26 | Artery - Tibial                          |
| ENSG00000266472.5  | MRPS21       | chr1_150083277_C_T_b38 | rs116819476 | 0.00029   | 0.22  | Artery - Tibial                          |
| ENSG00000143369.14 | ECM1         | chr1_150083277_C_T_b38 | rs116819476 | 0.000056  | 0.63  | Brain - Cerebellar Hemisphere            |
| ENSG00000143369.14 | ECM1         | chr1_150083277_C_T_b38 | rs116819476 | 6.40E-08  | 0.92  | Brain - Cerebellum                       |
| ENSG00000143369.14 | ECM1         | chr1_150083277_C_T_b38 | rs116819476 | 5.60E-09  | 0.49  | Cells - Cultured fibroblasts             |
| ENSG00000143363.15 | PRUNE1       | chr1_150083277_C_T_b38 | rs116819476 | 0.00011   | 0.33  | Cells - Cultured fibroblasts             |
| ENSG00000143382.14 | ADAMTSL4     | chr1_150083277_C_T_b38 | rs116819476 | 0.00024   | 0.21  | Cells - Cultured fibroblasts             |
| ENSG00000266472.5  | MRPS21       | chr1_150083277_C_T_b38 | rs116819476 | 0.00057   | 0.28  | Cells - Cultured fibroblasts             |
| ENSG00000143369.14 | ECM1         | chr1_150083277_C_T_b38 | rs116819476 | 3.50E-12  | 1.6   | Cells - EBV-transformed lymphocytes      |
| ENSG00000266472.5  | MRPS21       | chr1_150083277_C_T_b38 | rs116819476 | 1.80E-07  | 0.48  | Colon - Sigmoid                          |
| ENSG00000266472.5  | MRPS21       | chr1_150083277_C_T_b38 | rs116819476 | 0.00021   | 0.31  | Esophagus - Mucosa                       |
| ENSG00000266472.5  | MRPS21       | chr1_150083277_C_T_b38 | rs116819476 | 1.50E-07  | 0.41  | Esophagus - Muscularis                   |
| ENSG00000266472.5  | MRPS21       | chr1_150083277_C_T_b38 | rs116819476 | 0.000015  | 0.36  | Heart - Atrial Appendage                 |
| ENSG00000143374.16 | TARS2        | chr1_150083277_C_T_b38 | rs116819476 | 0.000037  | -0.26 | Heart - Left Ventricle                   |
| ENSG00000266472.5  | MRPS21       | chr1_150083277_C_T_b38 | rs116819476 | 0.00001   | 0.31  | Nerve - Tibial                           |
| ENSG00000228126.1  | FALEC        | chr1_150083277_C_T_b38 | rs116819476 | 0.00024   | 0.49  | Nerve - Tibial                           |
| ENSG00000266472.5  | MRPS21       | chr1_150083277_C_T_b38 | rs116819476 | 0.000032  | 0.76  | Pituitary                                |
| ENSG00000143369.14 | ECM1         | chr1_150083277_C_T_b38 | rs116819476 | 0.0000049 | 0.34  | Thyroid                                  |
| ENSG00000163141.18 | BNIP1        | chr1_150083277_C_T_b38 | rs116819476 | 0.000063  | 0.46  | Thyroid                                  |
| ENSG00000143369.14 | ECM1         | chr1_150083277_C_T_b38 | rs116819476 | 0.0000021 | 0.51  | Whole Blood                              |
| ENSG00000238042.5  | RP11-815M8.1 | chr1_221888631_T_C_b38 | rs11577023  | 2.10E-16  | 0.46  | Lung                                     |
| ENSG00000238042.5  | RP11-815M8.1 | chr1_221888631_T_C_b38 | rs11577023  | 0.00012   | 0.21  | Nerve - Tibial                           |
| ENSG00000214595.11 | EML6         | chr2_54654484_T_C_b38  | rs2941584   | 1.10E-17  | 0.4   | Artery - Tibial                          |
| ENSG00000214595.11 | EML6         | chr2_54654484_T_C_b38  | rs2941584   | 5.80E-16  | 0.46  | Esophagus - Muscularis                   |
| ENSG00000115306.15 | SPTBN1       | chr2_54654484_T_C_b38  | rs2941584   | 1.80E-14  | -0.2  | Whole Blood                              |
| ENSG00000214595.11 | EML6         | chr2_54654484_T_C_b38  | rs2941584   | 2.60E-11  | 0.39  | Artery - Aorta                           |
| ENSG00000214595.11 | EML6         | chr2_54654484_T_C_b38  | rs2941584   | 2.10E-08  | 0.48  | Artery - Coronary                        |
| ENSG00000237887.1  | RPL23AP32    | chr2_54654484_T_C_b38  | rs2941584   | 8.60E-08  | -0.25 | Lung                                     |
| ENSG00000214595.11 | EML6         | chr2_54654484_T_C_b38  | rs2941584   | 1.60E-07  | 0.35  | Esophagus - Gastroesophageal Junction    |
| ENSG00000238018.2  | AC093110.3   | chr2_54654484_T_C_b38  | rs2941584   | 2.60E-07  | 0.13  | Artery - Tibial                          |
| ENSG00000238018.2  | AC093110.3   | chr2_54654484_T_C_b38  | rs2941584   | 3.10E-07  | 0.18  | Muscle - Skeletal                        |
| ENSG00000237887.1  | RPL23AP32    | chr2_54654484_T_C_b38  | rs2941584   | 4.80E-07  | -0.22 | Thyroid                                  |
| ENSG00000238018.2  | AC093110.3   | chr2_54654484_T_C_b38  | rs2941584   | 8.00E-07  | 0.15  | Skin - Sun Exposed (Lower leg)           |
| ENSG00000237887.1  | RPL23AP32    | chr2_54654484_T_C_b38  | rs2941584   | 0.0000013 | -0.45 | Brain - Anterior cingulate cortex (BA24) |
| ENSG00000115306.15 | SPTBN1       | chr2_54654484_T_C_b38  | rs2941584   | 0.0000017 | 0.11  | Skin - Sun Exposed (Lower leg)           |
| ENSG00000214595.11 | EML6         | chr2_54654484_T_C_b38  | rs2941584   | 0.0000018 | 0.28  | Colon - Sigmoid                          |
| ENSG00000214595.11 | EML6         | chr2_54654484_T_C_b38  | rs2941584   | 0.000003  | 0.27  | Adipose - Visceral (Omentum)             |
| ENSG00000237887.1  | RPL23AP32    | chr2_54654484_T_C_b38  | rs2941584   | 0.0000034 | -0.34 | Brain - Cerebellar Hemisphere            |
| ENSG00000115306.15 | SPTBN1       | chr2_54654484_T_C_b38  | rs2941584   | 0.000005  | 0.12  | Skin - Not Sun Exposed (Suprapubic)      |
| ENSG00000237887.1  | RPL23AP32    | chr2_54654484_T_C_b38  | rs2941584   | 0.0000065 | -0.34 | Testis                                   |
| ENSG00000237887.1  | RPL23AP32    | chr2_54654484_T_C_b38  | rs2941584   | 0.0000071 | -0.22 | Adipose - Visceral (Omentum)             |
| ENSG00000238018.2  | AC093110.3   | chr2_54654484_T_C_b38  | rs2941584   | 0.0000098 | 0.11  | Nerve - Tibial                           |
| ENSG00000238018.2  | AC093110.3   | chr2_54654484_T_C_b38  | rs2941584   | 0.000016  | 0.11  | Adipose - Subcutaneous                   |
| ENSG00000115306.15 | SPTBN1       | chr2_54654484_T_C_b38  | rs2941584   | 0.000018  | -0.14 | Cells - Cultured fibroblasts             |
| ENSG00000237887.1  | RPL23AP32    | chr2_54654484_T_C_b38  | rs2941584   | 0.000027  | -0.22 | Adipose - Subcutaneous                   |
| ENSG00000214595.11 | EML6         | chr2_54654484_T_C_b38  | rs2941584   | 0.000032  | -0.19 | Thyroid                                  |
| ENSG00000238018.2  | AC093110.3   | chr2_54654484_T_C_b38  | rs2941584   | 0.000038  | 0.11  | Esophagus - Gastroesophageal Junction    |
| ENSG00000238018.2  | AC093110.3   | chr2_54654484_T_C_b38  | rs2941584   | 0.000072  | 0.11  | Thyroid                                  |
| ENSG00000115306.15 | SPTBN1       | chr2_54654484_T_C_b38  | rs2941584   | 0.0001    | 0.14  | Muscle - Skeletal                        |
| ENSG00000214595.11 | EML6         | chr2_54654484_T_C_b38  | rs2941584   | 0.00016   | -0.14 | Skin - Sun Exposed (Lower leg)           |
| ENSG00000238018.2  | AC093110.3   | chr2_54654484_T_C_b38  | rs2941584   | 0.00024   | 0.099 | Lung                                     |
| ENSG00000159733.13 | ZFYVE28      | chr4_2403335_C_G_b38   | rs35802140  | 5.40E-14  | -0.55 | Colon - Sigmoid                          |
| ENSG00000159733.13 | ZFYVE28      | chr4_2403335_C_G_b38   | rs35802140  | 1.10E-11  | -0.43 | Esophagus - Muscularis                   |



| Gencode Id         | Gene Symbol | Variant Id              | SNP Id     | P-Value   | NES   | Tissue                                |
|--------------------|-------------|-------------------------|------------|-----------|-------|---------------------------------------|
| ENSG00000159733.13 | ZFYVE28     | chr4_2403335_C_G_b38    | rs35802140 | 5.50E-11  | -0.56 | Heart - Atrial Appendage              |
| ENSG00000159733.13 | ZFYVE28     | chr4_2403335_C_G_b38    | rs35802140 | 8.20E-09  | -0.33 | Thyroid                               |
| ENSG00000159733.13 | ZFYVE28     | chr4_2403335_C_G_b38    | rs35802140 | 2.20E-08  | -0.55 | Prostate                              |
| ENSG00000159733.13 | ZFYVE28     | chr4_2403335_C_G_b38    | rs35802140 | 3.30E-07  | -0.4  | Heart - Left Ventricle                |
| ENSG00000159733.13 | ZFYVE28     | chr4_2403335_C_G_b38    | rs35802140 | 4.60E-07  | -0.36 | Esophagus - Gastroesophageal Junction |
| ENSG00000159733.13 | ZFYVE28     | chr4_2403335_C_G_b38    | rs35802140 | 0.0000011 | -0.3  | Adipose - Visceral (Omentum)          |
| ENSG00000206113.10 | CFAP99      | chr4_2403335_C_G_b38    | rs35802140 | 0.0000047 | -0.26 | Thyroid                               |
| ENSG00000159733.13 | ZFYVE28     | chr4_2403335_C_G_b38    | rs35802140 | 0.0000059 | -0.25 | Artery - Tibial                       |
| ENSG00000159733.13 | ZFYVE28     | chr4_2403335_C_G_b38    | rs35802140 | 0.000023  | -0.27 | Lung                                  |
| ENSG00000063978.15 | RNF4        | chr4_2403335_C_G_b38    | rs35802140 | 0.000024  | 0.11  | Cells - Cultured fibroblasts          |
| ENSG00000063978.15 | RNF4        | chr4_2403335_C_G_b38    | rs35802140 | 0.00003   | 0.25  | Colon - Sigmoid                       |
| ENSG00000159733.13 | ZFYVE28     | chr4_2403335_C_G_b38    | rs35802140 | 0.00015   | -0.2  | Adipose - Subcutaneous                |
| ENSG00000203791.14 | METTL10     | chr10_124616865_T_C_b38 | rs4962671  | 3.80E-29  | 0.3   | Cells - Cultured fibroblasts          |
| ENSG00000203791.14 | METTL10     | chr10_124616865_T_C_b38 | rs4962671  | 5.40E-28  | 0.32  | Esophagus - Mucosa                    |
| ENSG00000203791.14 | METTL10     | chr10_124616865_T_C_b38 | rs4962671  | 1.50E-27  | 0.31  | Artery - Tibial                       |
| ENSG00000203791.14 | METTL10     | chr10_124616865_T_C_b38 | rs4962671  | 2.30E-27  | 0.32  | Adipose - Subcutaneous                |
| ENSG00000203791.14 | METTL10     | chr10_124616865_T_C_b38 | rs4962671  | 3.50E-26  | 0.3   | Thyroid                               |
| ENSG00000203791.14 | METTL10     | chr10_124616865_T_C_b38 | rs4962671  | 2.00E-24  | 0.38  | Breast - Mammary Tissue               |
| ENSG00000203791.14 | METTL10     | chr10_124616865_T_C_b38 | rs4962671  | 6.20E-22  | 0.33  | Lung                                  |
| ENSG00000203791.14 | METTL10     | chr10_124616865_T_C_b38 | rs4962671  | 1.60E-21  | 0.31  | Adipose - Visceral (Omentum)          |
| ENSG00000203791.14 | METTL10     | chr10_124616865_T_C_b38 | rs4962671  | 1.30E-20  | 0.36  | Artery - Aorta                        |
| ENSG00000203791.14 | METTL10     | chr10_124616865_T_C_b38 | rs4962671  | 6.80E-20  | 0.26  | Skin - Sun Exposed (Lower leg)        |
| ENSG00000203791.14 | METTL10     | chr10_124616865_T_C_b38 | rs4962671  | 4.30E-19  | 0.22  | Muscle - Skeletal                     |
| ENSG00000203791.14 | METTL10     | chr10_124616865_T_C_b38 | rs4962671  | 1.30E-17  | 0.26  | Skin - Not Sun Exposed (Suprapubic)   |
| ENSG00000203791.14 | METTL10     | chr10_124616865_T_C_b38 | rs4962671  | 1.10E-16  | 0.3   | Colon - Transverse                    |
| ENSG00000203791.14 | METTL10     | chr10_124616865_T_C_b38 | rs4962671  | 3.00E-15  | 0.27  | Testis                                |
| ENSG00000107902.13 | LHPP        | chr10_124616865_T_C_b38 | rs4962671  | 5.60E-15  | -0.15 | Nerve - Tibial                        |
| ENSG00000203791.14 | METTL10     | chr10_124616865_T_C_b38 | rs4962671  | 7.80E-14  | 0.33  | Stomach                               |
| ENSG00000203791.14 | METTL10     | chr10_124616865_T_C_b38 | rs4962671  | 8.60E-14  | 0.24  | Nerve - Tibial                        |
| ENSG00000203791.14 | METTL10     | chr10_124616865_T_C_b38 | rs4962671  | 5.10E-13  | 0.21  | Esophagus - Muscularis                |
| ENSG00000203791.14 | METTL10     | chr10_124616865_T_C_b38 | rs4962671  | 3.10E-12  | 0.33  | Heart - Left Ventricle                |
| ENSG00000203791.14 | METTL10     | chr10_124616865_T_C_b38 | rs4962671  | 3.20E-12  | 0.33  | Prostate                              |
| ENSG00000203791.14 | METTL10     | chr10_124616865_T_C_b38 | rs4962671  | 3.30E-12  | 0.36  | Liver                                 |
| ENSG00000203791.14 | METTL10     | chr10_124616865_T_C_b38 | rs4962671  | 1.10E-10  | 0.27  | Heart - Atrial Appendage              |
| ENSG00000203791.14 | METTL10     | chr10_124616865_T_C_b38 | rs4962671  | 1.10E-10  | 0.41  | Small Intestine - Terminal Ileum      |
| ENSG00000203791.14 | METTL10     | chr10_124616865_T_C_b38 | rs4962671  | 1.50E-10  | 0.45  | Cells - EBV-transformed lymphocytes   |
| ENSG00000203791.14 | METTL10     | chr10_124616865_T_C_b38 | rs4962671  | 1.60E-10  | 0.35  | Artery - Coronary                     |
| ENSG00000203791.14 | METTL10     | chr10_124616865_T_C_b38 | rs4962671  | 2.80E-10  | 0.14  | Whole Blood                           |
| ENSG00000203791.14 | METTL10     | chr10_124616865_T_C_b38 | rs4962671  | 3.00E-10  | 0.34  | Adrenal Gland                         |
| ENSG00000203791.14 | METTL10     | chr10_124616865_T_C_b38 | rs4962671  | 5.30E-10  | 0.32  | Brain - Caudate (basal ganglia)       |
| ENSG00000203791.14 | METTL10     | chr10_124616865_T_C_b38 | rs4962671  | 8.20E-10  | 0.35  | Pituitary                             |
| ENSG00000203791.14 | METTL10     | chr10_124616865_T_C_b38 | rs4962671  | 3.00E-09  | 0.21  | Esophagus - Gastroesophageal Junction |
| ENSG00000203791.14 | METTL10     | chr10_124616865_T_C_b38 | rs4962671  | 5.30E-09  | 0.33  | Brain - Nucleus accumbens (basal      |
| ENSG00000203791.14 | METTL10     | chr10_124616865_T_C_b38 | rs4962671  | 6.70E-09  | 0.43  | Brain - Amygdala                      |
| ENSG00000203791.14 | METTL10     | chr10_124616865_T_C_b38 | rs4962671  | 7.90E-09  | 0.35  | Brain - Cortex                        |
| ENSG00000203791.14 | METTL10     | chr10_124616865_T_C_b38 | rs4962671  | 8.30E-09  | 0.35  | Spleen                                |
| ENSG00000203791.14 | METTL10     | chr10_124616865_T_C_b38 | rs4962671  | 2.80E-08  | 0.2   | Colon - Sigmoid                       |
| ENSG00000203791.14 | METTL10     | chr10_124616865_T_C_b38 | rs4962671  | 3.20E-08  | 0.41  | Vagina                                |
| ENSG00000203791.14 | METTL10     | chr10_124616865_T_C_b38 | rs4962671  | 2.00E-07  | 0.32  | Brain - Putamen (basal ganglia)       |
| ENSG00000203791.14 | METTL10     | chr10_124616865_T_C_b38 | rs4962671  | 2.70E-07  | 0.27  | Pancreas                              |
| ENSG00000203791.14 | METTL10     | chr10_124616865_T_C_b38 | rs4962671  | 5.80E-07  | 0.29  | Minor Salivary Gland                  |
| ENSG00000203791.14 | METTL10     | chr10_124616865_T_C_b38 | rs4962671  | 0.0000065 | 0.24  | Brain - Hypothalamus                  |
| ENSG00000203791.14 | METTL10     | chr10_124616865_T_C_b38 | rs4962671  | 0.000012  | 0.32  | Uterus                                |
| ENSG00000107902.13 | LHPP        | chr10_124616865_T_C_b38 | rs4962671  | 0.000024  | -0.21 | Brain - Putamen (basal ganglia)       |
| ENSG00000107902.13 | LHPP        | chr10_124616865_T_C_b38 | rs4962671  | 0.00007   | -0.11 | Artery - Tibial                       |
| ENSG00000189319.13 | FAM53B      | chr10_124616865_T_C_b38 | rs4962671  | 0.000088  | -0.12 | Cells - Cultured fibroblasts          |

| Gencode Id         | Gene Symbol   | Variant Id              | SNP Id      | P-Value  | NES   | Tissue                                    |
|--------------------|---------------|-------------------------|-------------|----------|-------|-------------------------------------------|
| ENSG00000170430.9  | MGMT          | chr10_129632422_G_A_b38 | rs524804    | 2.10E-70 | -0.64 | Thyroid                                   |
| ENSG00000170430.9  | MGMT          | chr10_129632422_G_A_b38 | rs524804    | 8.80E-64 | -0.63 | Skin - Sun Exposed (Lower leg)            |
| ENSG00000170430.9  | MGMT          | chr10_129632422_G_A_b38 | rs524804    | 5.10E-62 | -0.73 | Esophagus - Mucosa                        |
| ENSG00000170430.9  | MGMT          | chr10_129632422_G_A_b38 | rs524804    | 7.40E-61 | -0.64 | Adipose - Visceral (Omentum)              |
| ENSG00000170430.9  | MGMT          | chr10_129632422_G_A_b38 | rs524804    | 2.50E-60 | -0.63 | Adipose - Subcutaneous                    |
| ENSG00000170430.9  | MGMT          | chr10_129632422_G_A_b38 | rs524804    | 7.30E-60 | -0.62 | Skin - Not Sun Exposed (Suprapubic)       |
| ENSG00000170430.9  | MGMT          | chr10_129632422_G_A_b38 | rs524804    | 1.00E-55 | -0.52 | Artery - Tibial                           |
| ENSG00000170430.9  | MGMT          | chr10_129632422_G_A_b38 | rs524804    | 2.10E-54 | -0.51 | Cells - Cultured fibroblasts              |
| ENSG00000170430.9  | MGMT          | chr10_129632422_G_A_b38 | rs524804    | 2.50E-50 | -0.62 | Lung                                      |
| ENSG00000170430.9  | MGMT          | chr10_129632422_G_A_b38 | rs524804    | 4.90E-48 | -0.37 | Whole Blood                               |
| ENSG00000170430.9  | MGMT          | chr10_129632422_G_A_b38 | rs524804    | 8.10E-47 | -0.71 | Artery - Aorta                            |
| ENSG00000170430.9  | MGMT          | chr10_129632422_G_A_b38 | rs524804    | 1.80E-46 | -0.41 | Muscle - Skeletal                         |
| ENSG00000170430.9  | MGMT          | chr10_129632422_G_A_b38 | rs524804    | 1.80E-43 | -0.54 | Nerve - Tibial                            |
| ENSG00000170430.9  | MGMT          | chr10_129632422_G_A_b38 | rs524804    | 2.70E-41 | -0.56 | Breast - Mammary Tissue                   |
| ENSG00000170430.9  | MGMT          | chr10_129632422_G_A_b38 | rs524804    | 4.30E-41 | -0.56 | Esophagus - Muscularis                    |
| ENSG00000170430.9  | MGMT          | chr10_129632422_G_A_b38 | rs524804    | 1.20E-38 | -0.53 | Heart - Atrial Appendage                  |
| ENSG00000170430.9  | MGMT          | chr10_129632422_G_A_b38 | rs524804    | 6.10E-38 | -0.68 | Colon - Transverse                        |
| ENSG00000170430.9  | MGMT          | chr10_129632422_G_A_b38 | rs524804    | 8.10E-35 | -0.65 | Stomach                                   |
| ENSG00000170430.9  | MGMT          | chr10_129632422_G_A_b38 | rs524804    | 3.10E-34 | -0.63 | Esophagus - Gastroesophageal Junction     |
| ENSG00000170430.9  | MGMT          | chr10_129632422_G_A_b38 | rs524804    | 2.50E-33 | -0.57 | Heart - Left Ventricle                    |
| ENSG00000170430.9  | MGMT          | chr10_129632422_G_A_b38 | rs524804    | 1.80E-30 | -0.54 | Colon - Sigmoid                           |
| ENSG00000170430.9  | MGMT          | chr10_129632422_G_A_b38 | rs524804    | 2.00E-29 | -0.73 | Adrenal Gland                             |
| ENSG00000170430.9  | MGMT          | chr10_129632422_G_A_b38 | rs524804    | 2.50E-28 | -0.54 | Testis                                    |
| ENSG00000170430.9  | MGMT          | chr10_129632422_G_A_b38 | rs524804    | 2.60E-27 | -0.48 | Liver                                     |
| ENSG00000170430.9  | MGMT          | chr10_129632422_G_A_b38 | rs524804    | 1.30E-26 | -0.65 | Prostate                                  |
| ENSG00000170430.9  | MGMT          | chr10_129632422_G_A_b38 | rs524804    | 2.60E-23 | -0.67 | Artery - Coronary                         |
| ENSG00000170430.9  | MGMT          | chr10_129632422_G_A_b38 | rs524804    | 3.00E-23 | -0.63 | Pituitary                                 |
| ENSG00000170430.9  | MGMT          | chr10_129632422_G_A_b38 | rs524804    | 6.90E-22 | -0.59 | Pancreas                                  |
| ENSG00000170430.9  | MGMT          | chr10_129632422_G_A_b38 | rs524804    | 5.50E-19 | -0.49 | Brain - Caudate (basal ganglia)           |
| ENSG00000170430.9  | MGMT          | chr10_129632422_G_A_b38 | rs524804    | 3.60E-18 | -0.59 | Brain - Cortex                            |
| ENSG00000170430.9  | MGMT          | chr10_129632422_G_A_b38 | rs524804    | 1.60E-17 | -0.59 | Brain - Cerebellar Hemisphere             |
| ENSG00000170430.9  | MGMT          | chr10_129632422_G_A_b38 | rs524804    | 4.50E-17 | -0.58 | Brain - Cerebellum                        |
| ENSG00000170430.9  | MGMT          | chr10_129632422_G_A_b38 | rs524804    | 2.20E-16 | -0.46 | Brain - Nucleus accumbens (basal ganglia) |
| ENSG00000170430.9  | MGMT          | chr10_129632422_G_A_b38 | rs524804    | 2.50E-16 | -0.53 | Brain - Spinal cord (cervical c-1)        |
| ENSG00000170430.9  | MGMT          | chr10_129632422_G_A_b38 | rs524804    | 3.40E-16 | -0.6  | Spleen                                    |
| ENSG00000170430.9  | MGMT          | chr10_129632422_G_A_b38 | rs524804    | 2.00E-14 | -0.64 | Small Intestine - Terminal Ileum          |
| ENSG00000170430.9  | MGMT          | chr10_129632422_G_A_b38 | rs524804    | 3.10E-14 | -0.82 | Cells - EBV-transformed lymphocytes       |
| ENSG00000170430.9  | MGMT          | chr10_129632422_G_A_b38 | rs524804    | 4.70E-14 | -0.49 | Brain - Hypothalamus                      |
| ENSG00000170430.9  | MGMT          | chr10_129632422_G_A_b38 | rs524804    | 1.70E-13 | -0.52 | Brain - Anterior cingulate cortex (BA24)  |
| ENSG00000170430.9  | MGMT          | chr10_129632422_G_A_b38 | rs524804    | 9.90E-13 | -0.57 | Brain - Hippocampus                       |
| ENSG00000170430.9  | MGMT          | chr10_129632422_G_A_b38 | rs524804    | 1.30E-12 | -0.47 | Brain - Frontal Cortex (BA9)              |
| ENSG00000170430.9  | MGMT          | chr10_129632422_G_A_b38 | rs524804    | 1.90E-11 | -0.44 | Brain - Putamen (basal ganglia)           |
| ENSG00000170430.9  | MGMT          | chr10_129632422_G_A_b38 | rs524804    | 3.70E-11 | -0.6  | Minor Salivary Gland                      |
| ENSG00000170430.9  | MGMT          | chr10_129632422_G_A_b38 | rs524804    | 5.70E-11 | -0.57 | Brain - Substantia nigra                  |
| ENSG00000170430.9  | MGMT          | chr10_129632422_G_A_b38 | rs524804    | 3.90E-09 | -0.63 | Uterus                                    |
| ENSG00000170430.9  | MGMT          | chr10_129632422_G_A_b38 | rs524804    | 4.60E-09 | -0.45 | Brain - Amygdala                          |
| ENSG00000170430.9  | MGMT          | chr10_129632422_G_A_b38 | rs524804    | 5.30E-08 | -0.58 | Vagina                                    |
| ENSG00000170430.9  | MGMT          | chr10_129632422_G_A_b38 | rs524804    | 6.90E-08 | -0.47 | Ovary                                     |
| ENSG00000108001.13 | EBF3          | chr10_129632422_G_A_b38 | rs524804    | 0.000015 | -0.14 | Esophagus - Mucosa                        |
| ENSG00000172725.13 | CORO1B        | chr11_67053385_C_A_b38  | rs117773425 | 0.000049 | 0.42  | Spleen                                    |
| ENSG00000174165.7  | ZDHHC24       | chr11_67053385_C_A_b38  | rs117773425 | 0.000052 | 0.51  | Artery - Tibial                           |
| ENSG00000255468.6  | RP11-867G23.8 | chr11_67053385_C_A_b38  | rs117773425 | 0.00033  | -0.66 | Thyroid                                   |
| ENSG00000105287.12 | PRKD2         | chr19_46778988_C_T_b38  | rs56385874  | 1.10E-19 | 0.27  | Artery - Tibial                           |
| ENSG00000181027.10 | FKRP          | chr19_46778988_C_T_b38  | rs56385874  | 2.50E-19 | 0.38  | Skin - Sun Exposed (Lower leg)            |
| ENSG00000181027.10 | FKRP          | chr19_46778988_C_T_b38  | rs56385874  | 4.20E-17 | 0.3   | Muscle - Skeletal                         |
| ENSG00000181027.10 | FKRP          | chr19_46778988_C_T_b38  | rs56385874  | 1.40E-16 | 0.39  | Skin - Not Sun Exposed (Suprapubic)       |

| Gencode Id         | Gene Symbol  | Variant Id             | SNP Id     | P-Value   | NES   | Tissue                                |
|--------------------|--------------|------------------------|------------|-----------|-------|---------------------------------------|
| ENSG00000181027.10 | FKRP         | chr19_46778988_C_T_b38 | rs56385874 | 2.10E-16  | 0.54  | Esophagus - Muscularis                |
| ENSG00000181027.10 | FKRP         | chr19_46778988_C_T_b38 | rs56385874 | 7.70E-16  | 0.4   | Nerve - Tibial                        |
| ENSG00000105281.12 | SLC1A5       | chr19_46778988_C_T_b38 | rs56385874 | 1.10E-13  | 0.25  | Cells - Cultured fibroblasts          |
| ENSG00000105287.12 | PRKD2        | chr19_46778988_C_T_b38 | rs56385874 | 3.30E-13  | 0.16  | Whole Blood                           |
| ENSG00000105287.12 | PRKD2        | chr19_46778988_C_T_b38 | rs56385874 | 4.60E-13  | 0.32  | Cells - Cultured fibroblasts          |
| ENSG00000181027.10 | FKRP         | chr19_46778988_C_T_b38 | rs56385874 | 6.40E-13  | 0.34  | Artery - Tibial                       |
| ENSG00000181027.10 | FKRP         | chr19_46778988_C_T_b38 | rs56385874 | 1.90E-12  | 0.35  | Thyroid                               |
| ENSG00000105287.12 | PRKD2        | chr19_46778988_C_T_b38 | rs56385874 | 1.10E-11  | 0.31  | Nerve - Tibial                        |
| ENSG00000181027.10 | FKRP         | chr19_46778988_C_T_b38 | rs56385874 | 1.30E-11  | 0.35  | Adipose - Subcutaneous                |
| ENSG00000181027.10 | FKRP         | chr19_46778988_C_T_b38 | rs56385874 | 2.90E-10  | 0.29  | Adipose - Visceral (Omentum)          |
| ENSG00000181027.10 | FKRP         | chr19_46778988_C_T_b38 | rs56385874 | 3.20E-10  | 0.48  | Colon - Sigmoid                       |
| ENSG00000181027.10 | FKRP         | chr19_46778988_C_T_b38 | rs56385874 | 4.90E-10  | 0.28  | Cells - Cultured fibroblasts          |
| ENSG00000181027.10 | FKRP         | chr19_46778988_C_T_b38 | rs56385874 | 5.20E-10  | 0.31  | Esophagus - Mucosa                    |
| ENSG00000105287.12 | PRKD2        | chr19_46778988_C_T_b38 | rs56385874 | 6.30E-10  | 0.23  | Thyroid                               |
| ENSG00000090372.14 | STRN4        | chr19_46778988_C_T_b38 | rs56385874 | 2.40E-09  | 0.14  | Skin - Sun Exposed (Lower leg)        |
| ENSG00000181027.10 | FKRP         | chr19_46778988_C_T_b38 | rs56385874 | 7.20E-09  | 0.29  | Colon - Transverse                    |
| ENSG00000181027.10 | FKRP         | chr19_46778988_C_T_b38 | rs56385874 | 3.70E-08  | 0.36  | Breast - Mammary Tissue               |
| ENSG00000105287.12 | PRKD2        | chr19_46778988_C_T_b38 | rs56385874 | 6.30E-08  | 0.22  | Esophagus - Muscularis                |
| ENSG00000181027.10 | FKRP         | chr19_46778988_C_T_b38 | rs56385874 | 9.20E-08  | 0.31  | Artery - Aorta                        |
| ENSG00000181027.10 | FKRP         | chr19_46778988_C_T_b38 | rs56385874 | 1.30E-07  | 0.23  | Lung                                  |
| ENSG00000181027.10 | FKRP         | chr19_46778988_C_T_b38 | rs56385874 | 3.20E-07  | 0.33  | Brain - Hippocampus                   |
| ENSG00000090372.14 | STRN4        | chr19_46778988_C_T_b38 | rs56385874 | 3.70E-07  | 0.13  | Esophagus - Mucosa                    |
| ENSG00000181027.10 | FKRP         | chr19_46778988_C_T_b38 | rs56385874 | 4.80E-07  | 0.3   | Heart - Left Ventricle                |
| ENSG00000090372.14 | STRN4        | chr19_46778988_C_T_b38 | rs56385874 | 5.20E-07  | 0.15  | Skin - Not Sun Exposed (Suprapubic)   |
| ENSG00000181027.10 | FKRP         | chr19_46778988_C_T_b38 | rs56385874 | 6.00E-07  | 0.46  | Prostate                              |
| ENSG00000105287.12 | PRKD2        | chr19_46778988_C_T_b38 | rs56385874 | 0.0000033 | 0.27  | Pancreas                              |
| ENSG00000105287.12 | PRKD2        | chr19_46778988_C_T_b38 | rs56385874 | 0.0000048 | 0.25  | Colon - Sigmoid                       |
| ENSG00000105287.12 | PRKD2        | chr19_46778988_C_T_b38 | rs56385874 | 0.0000049 | 0.17  | Adipose - Visceral (Omentum)          |
| ENSG00000105287.12 | PRKD2        | chr19_46778988_C_T_b38 | rs56385874 | 0.0000086 | 0.28  | Pituitary                             |
| ENSG00000181027.10 | FKRP         | chr19_46778988_C_T_b38 | rs56385874 | 0.0000095 | 0.15  | Whole Blood                           |
| ENSG00000105287.12 | PRKD2        | chr19_46778988_C_T_b38 | rs56385874 | 0.000014  | 0.34  | Liver                                 |
| ENSG00000105287.12 | PRKD2        | chr19_46778988_C_T_b38 | rs56385874 | 0.000021  | 0.18  | Breast - Mammary Tissue               |
| ENSG00000181027.10 | FKRP         | chr19_46778988_C_T_b38 | rs56385874 | 0.000029  | 0.38  | Esophagus - Gastroesophageal Junction |
| ENSG00000269487.1  | CTB-174O21.2 | chr19_46778988_C_T_b38 | rs56385874 | 0.000031  | -0.31 | Nerve - Tibial                        |
| ENSG00000105281.12 | SLC1A5       | chr19_46778988_C_T_b38 | rs56385874 | 0.000036  | 0.19  | Artery - Aorta                        |
| ENSG00000105281.12 | SLC1A5       | chr19_46778988_C_T_b38 | rs56385874 | 0.000039  | 0.14  | Artery - Tibial                       |
| ENSG00000090372.14 | STRN4        | chr19_46778988_C_T_b38 | rs56385874 | 0.000045  | 0.091 | Whole Blood                           |
| ENSG00000181027.10 | FKRP         | chr19_46778988_C_T_b38 | rs56385874 | 0.000057  | 0.33  | Brain - Cerebellar Hemisphere         |
| ENSG00000105287.12 | PRKD2        | chr19_46778988_C_T_b38 | rs56385874 | 0.000066  | 0.15  | Muscle - Skeletal                     |
| ENSG00000090372.14 | STRN4        | chr19_46778988_C_T_b38 | rs56385874 | 0.000089  | 0.11  | Cells - Cultured fibroblasts          |
| ENSG00000101144.12 | BMP7         | chr20_57248706_G_A_b38 | rs6127980  | 4.10E-10  | 0.17  | Skin - Sun Exposed (Lower leg)        |
| ENSG00000101146.12 | RAE1         | chr20_57248706_G_A_b38 | rs6127980  | 0.0000036 | 0.15  | Testis                                |
| ENSG00000101144.12 | BMP7         | chr20_57248706_G_A_b38 | rs6127980  | 0.000015  | 0.18  | Skin - Not Sun Exposed (Suprapubic)   |
| ENSG00000132819.16 | RBM38        | chr20_57248706_G_A_b38 | rs6127980  | 0.00002   | 0.22  | Esophagus - Mucosa                    |

**Table S13:** Association of rs7133378 & rs1716407 and rs56361048 & rs7258937 with BFPAdj in males when both SNPs were in the model

| SNP                                                 | CHR | BP (HG19)   | A0 | A1 | $\beta$ | SE   | P        | Interaction P |
|-----------------------------------------------------|-----|-------------|----|----|---------|------|----------|---------------|
| <b>rs7133378 &amp; rs1716407 both in the model</b>  |     |             |    |    |         |      |          |               |
| rs7133378                                           | 12  | 124,409,502 | A  | G  | -0.15   | 0.02 | 2.53E-12 | 0.72          |
| rs1716407                                           | 12  | 124,515,218 | A  | G  | 0.11    | 0.02 | 4.20E-8  |               |
| <b>rs56361048 &amp; rs7258937 both in the model</b> |     |             |    |    |         |      |          |               |
| rs56361048                                          | 19  | 33,885,318  | C  | T  | -0.10   | 0.03 | 2.66E-4  | 0.95          |
| rs7258937                                           | 19  | 33,938,800  | T  | C  | -0.14   | 0.02 | 5.09E-12 |               |

Linear regression was used to test association of the two SNPs with BFP in males when Age, Age<sup>2</sup>, Albumin, Albumin<sup>2</sup>, SHBG, SHBG<sup>2</sup>, Testosterone, Testosterone<sup>2</sup> and first 10 PCs were in the model.

**Table S14:** Association of rs74841570 and rs11057402 with BFPAdj in females when both SNPs were in the model

| SNP        | CHR | BP (HG19)   | A0 | A1 | $\beta$ | SE   | P        | Int $\beta$ | Int SE | Int P   |
|------------|-----|-------------|----|----|---------|------|----------|-------------|--------|---------|
| rs74841570 | 12  | 124,407,903 | C  | A  | -0.25   | 0.05 | 3.33E-7  | 0.39        | 0.15   | 1.20E-2 |
| rs11057402 | 12  | 124,430,767 | A  | T  | 0.22    | 0.03 | 5.42E-11 |             |        |         |

Linear regression was used to test association of the two SNPs with BFP in females when Age, Age<sup>2</sup>, Albumin, Albumin<sup>2</sup>, SHBG, SHBG<sup>2</sup>, Testosterone, Testosterone<sup>2</sup> and first 10 PCs were in the model.

## Supplementary Figures

**Figure S1:** Distribution of BFP in males and females

**A.**

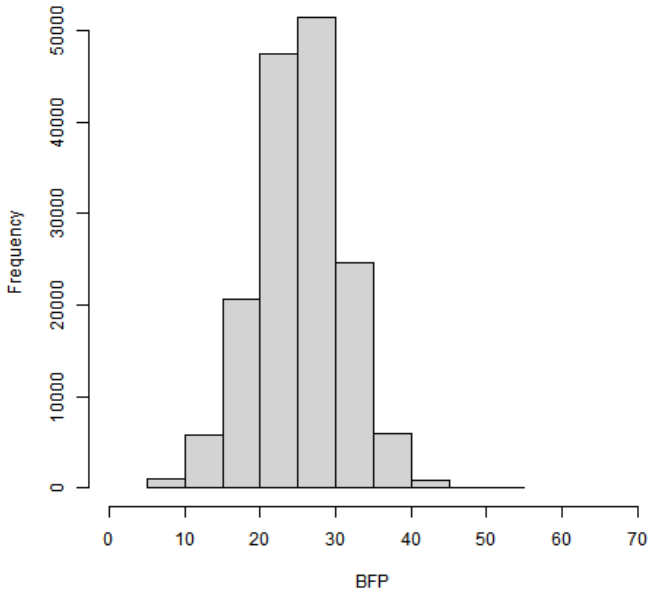

**B.**

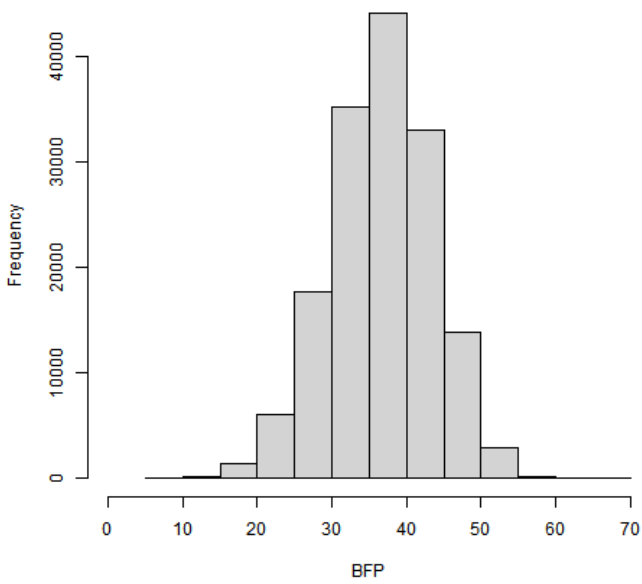

A: Males, B: Females

The plot shows the distribution of BFP in 157,937 males (A) and 154,337 females (B) from the UK biobank.

**Figure S2:** Association of BFPAdj GWAS SNPs in the current analysis with SHBG in Ruth et al analysis (1) in males (N = 193) and females (N = 174)

**A.**

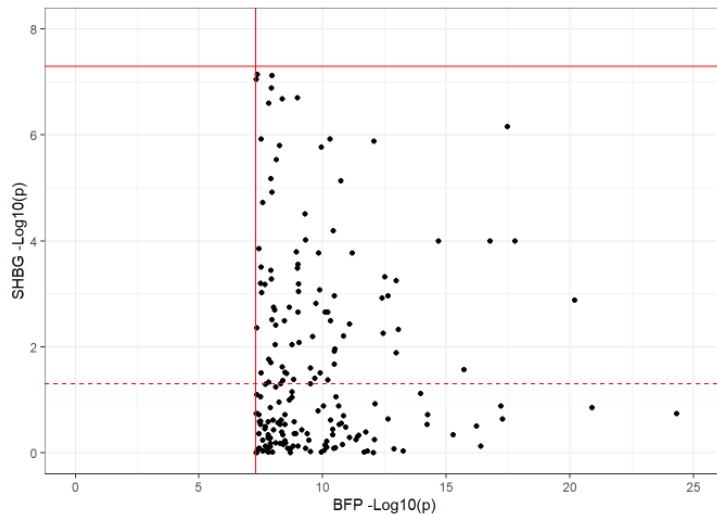

**B.**

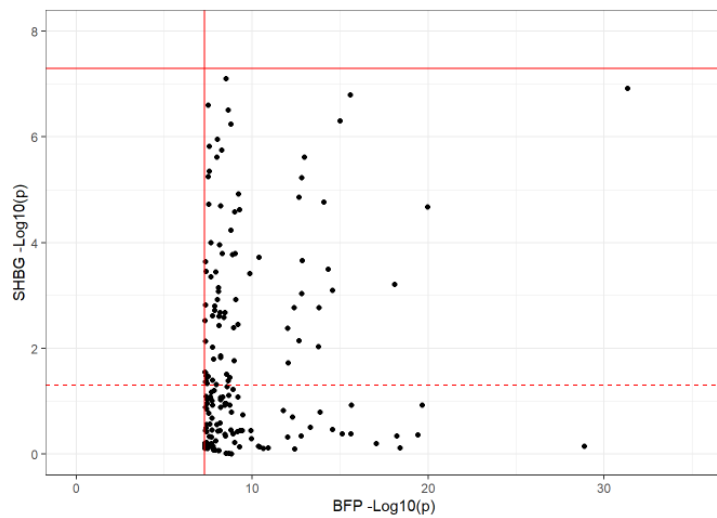

A: Males, B: Females

The plots show  $-\log_{10}(\text{p-value})$  regarding association of SNPs with BFPAdj vs. their association with SHBG in males (A) and females (B).

The solid red line shows  $x = 7.3$  and  $y = 7.3$  (genome-wide significance). The dashed red line shows  $y = 1.3$  (nominal significance).

**Figure S3:** Association of BFPAdj GWAS SNPs in the current analysis with testosterone in Ruth et al analysis (1) in males and females

**A.**

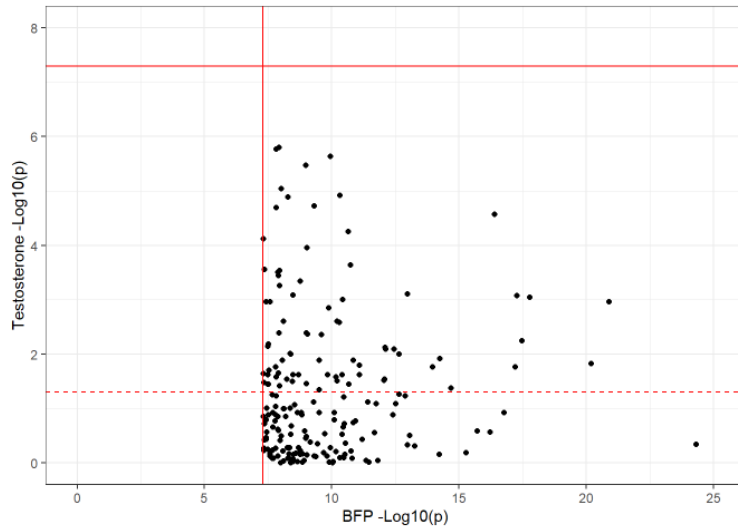

**B.**

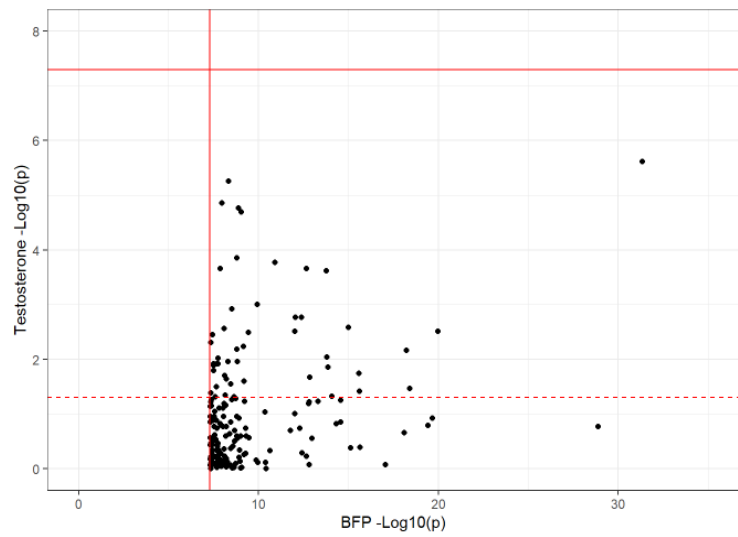

A: Males, B: Female

The plots show  $-\log_{10}(\text{p-value})$  regarding association of SNPs with BFPAdj vs. their association with testosterone in males (A) and females (B).

The solid red line shows  $x = 7.3$  and  $y = 7.3$  (genome-wide significance). The dashed red line shows  $y = 1.3$  (nominal significance).

**Figure S4:** The effect sizes of independent BFPAdj GWAS loci in males (N = 193) and females (N = 174)

A.

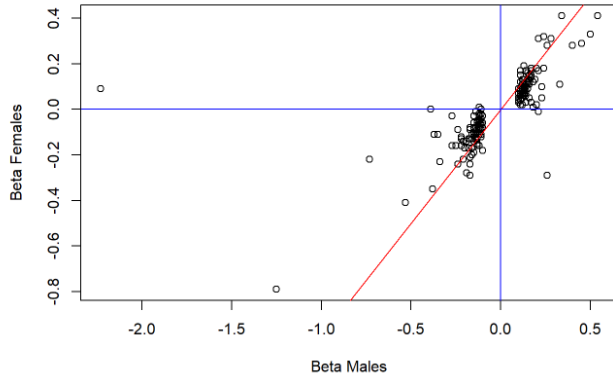

B.

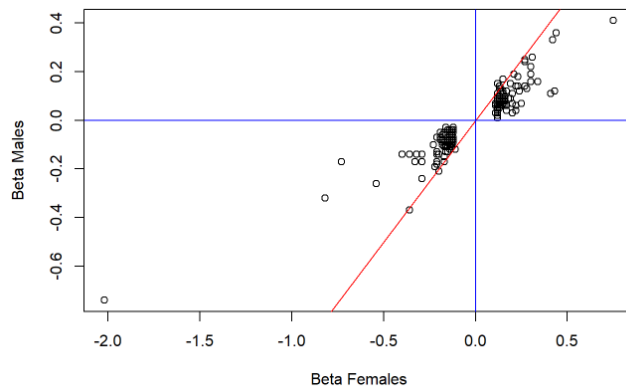

A: Males; the plot shows the effect ( $\beta \pm SE$ ) of BFPAdj male GWAS loci on BFPAdj in males (X axis) vs. their effect ( $\beta \pm SE$ ) on BFPAdj in females (Y axis).

B: Female; the plot shows the effect ( $\beta \pm SE$ ) of BFPAdj female GWAS loci on BFPAdj in females (X axis) vs. their effect on BFPAdj in males (Y axis).

The red line is  $x = y$ , and blue lines are  $x = 0$  and  $y = 0$ .



**Figure S5:** The p-values ( $-\log_{10}$ ) of independent BFPAdj GWAS loci in males (N = 193) and females (N = 174)

A.

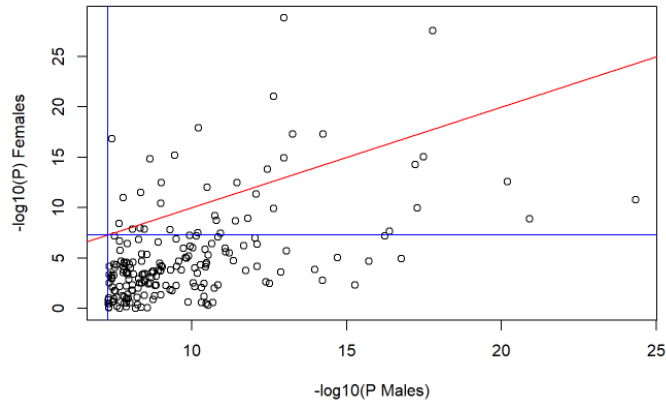

B.

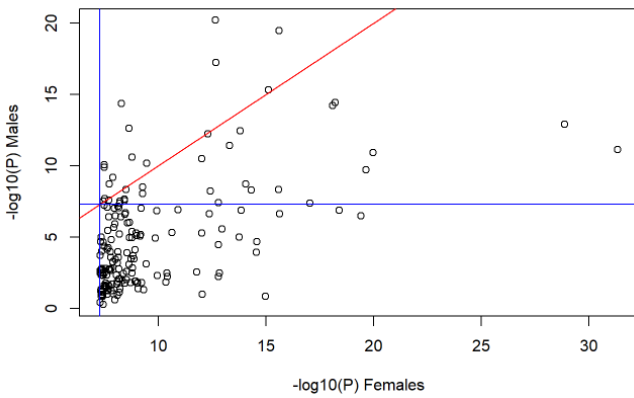

A: Males; the plot show  $-\log_{10}$ (p-value) regarding association of BFPAdj male GWAS loci with BFPAdj in males (X axis) vs. their association with BFPAdj in females (Y axis).

B: Females; the plot show  $-\log_{10}$ (p-value) regarding association of BFPAdj female GWAS loci with BFPAdj in females (X axis) vs. their association with BFPAdj in males (Y axis).

The red line is  $x = y$ , and blue lines are  $x = 7.3$  and  $y = 7.3$  (genome-wide significance).

**Figure S6:** Association of BFPAdj GWAS SNPs in the current analysis with BFP in Neale's round 2 GWAS results

**A.**

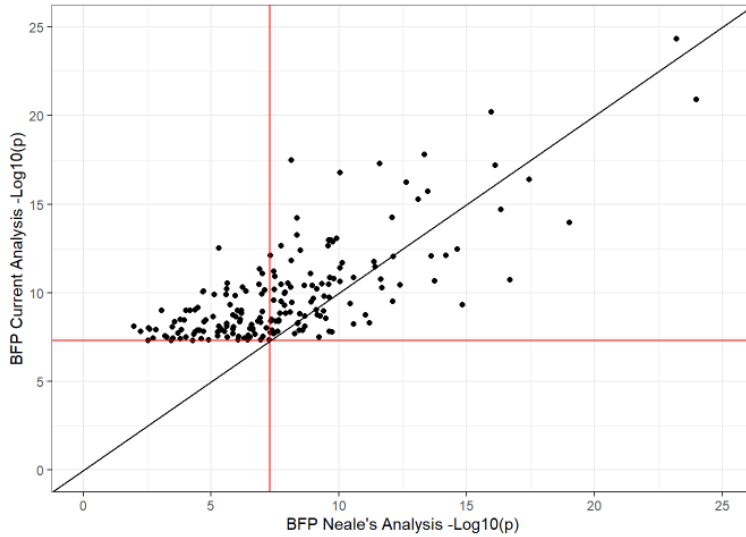

**B.**

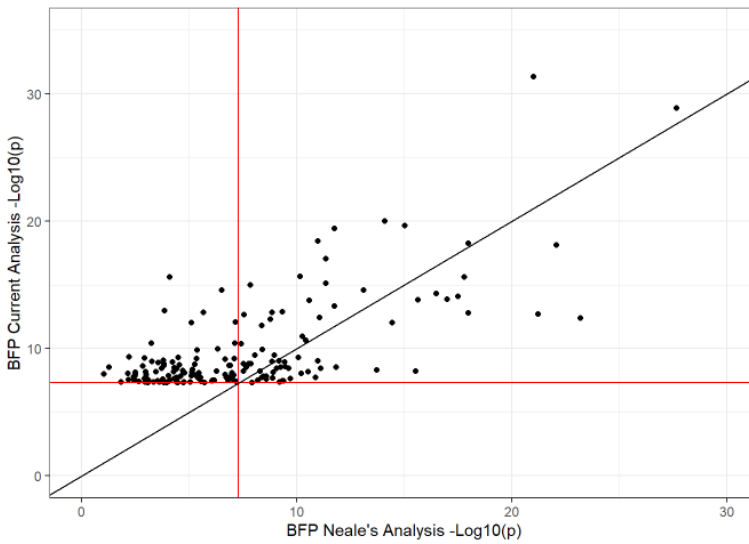

A: Males, B: Female

The plots show  $-\log_{10}(\text{p-value})$  regarding association of BFPAdj GWAS loci with BFP in Neale's round 2 GWAS results (X axis) vs. BFPAdj in the current analysis (Y axis) in males (A) and females (B).

The solid red line shows  $x = 7.3$  and  $y = 7.3$  (genome-wide significance). The black line shows  $x = y$ .

**Figure S7:** Association of SNPs on Chr X with BFPAdj in males and females

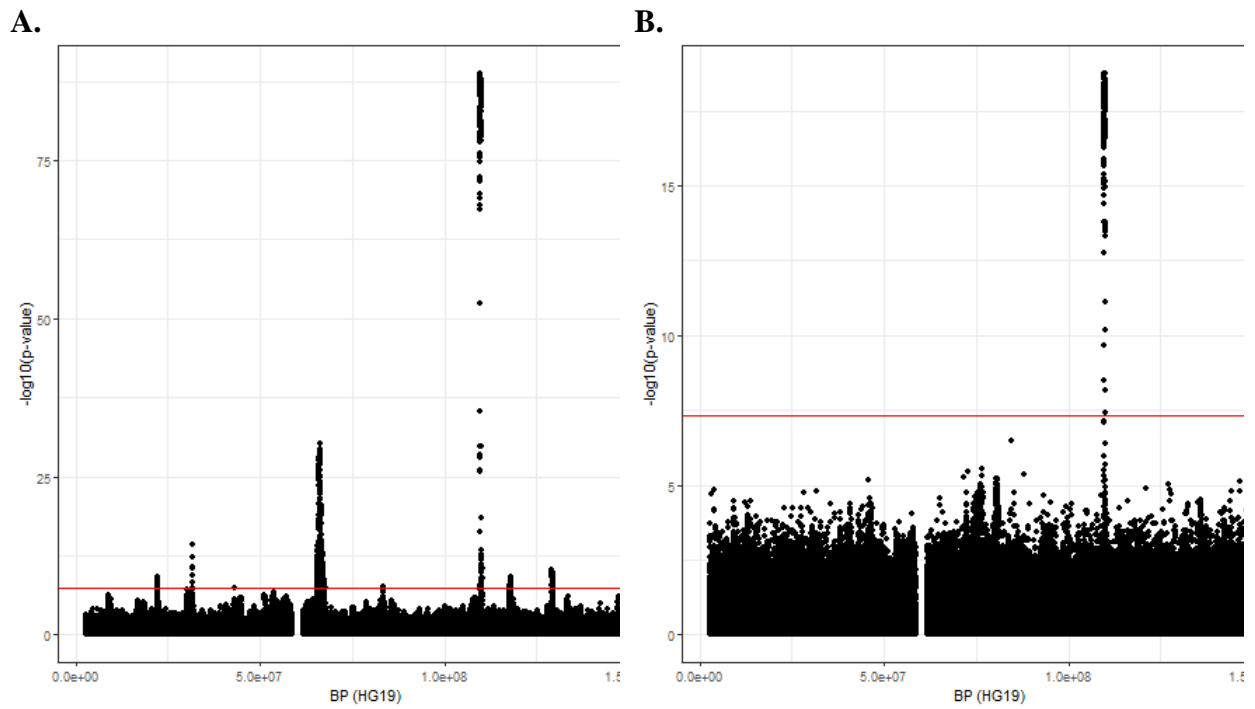

A: Males, B: Females

Associations of SNPs on chromosome X were tested with BFPAdj in 157,937 males and 154,337 females from the UK biobank separately. Age, centered age<sup>2</sup>, serum albumin, centered albumin<sup>2</sup>, serum SHBG, centered SHBG<sup>2</sup>, serum testosterone, centered testosterone<sup>2</sup>, and first ten genetic PCs were included as covariates in the model. The X axis shows the SNP location on chromosome X and the Y axis shows  $-\log_{10}(\text{p-value})$  regarding SNP association with BFPAdj in males (A) and females (B).

## References

1. Ruth KS, Day FR, Tyrrell J, Thompson DJ, Wood AR, Mahajan A, et al. Using human genetics to understand the disease impacts of testosterone in men and women. *Nat Med.* 2020;26(2):252-8.
2. Graham SE, Clarke SL, Wu KH, Kanoni S, Zajac GJM, Ramdas S, et al. The power of genetic diversity in genome-wide association studies of lipids. *Nature.* 2021;600(7890):675-9.
3. Mahajan A, Spracklen CN, Zhang W, Ng MCY, Petty LE, Kitajima H, et al. Multi-ancestry genetic study of type 2 diabetes highlights the power of diverse populations for discovery and translation. *Nat Genet.* 2022;54(5):560-72.
4. Aragam KG, Jiang T, Goel A, Kanoni S, Wolford BN, Atri DS, et al. Discovery and systematic characterization of risk variants and genes for coronary artery disease in over a million participants. *Nat Genet.* 2022;54(12):1803-15.
5. Agrawal S, Wang M, Klarqvist MDR, Smith K, Shin J, Dashti H, et al. Inherited basis of visceral, abdominal subcutaneous and gluteofemoral fat depots. *Nat Commun.* 2022;13(1):3771.
6. Pulit SL, Stoneman C, Morris AP, Wood AR, Glastonbury CA, Tyrrell J, et al. Meta-analysis of genome-wide association studies for body fat distribution in 694 649 individuals of European ancestry. *Hum Mol Genet.* 2019;28(1):166-74.
7. Lu Y, Day FR, Gustafsson S, Buchkovich ML, Na J, Bataille V, et al. New loci for body fat percentage reveal link between adiposity and cardiometabolic disease risk. *Nat Commun.* 2016;7:10495.

# **MR Analysis in Males**

## **1- T2D**

MR Test

- Inverse variance weighted
- MR Egger
- Simple mode
- Weighted median
- Weighted mode

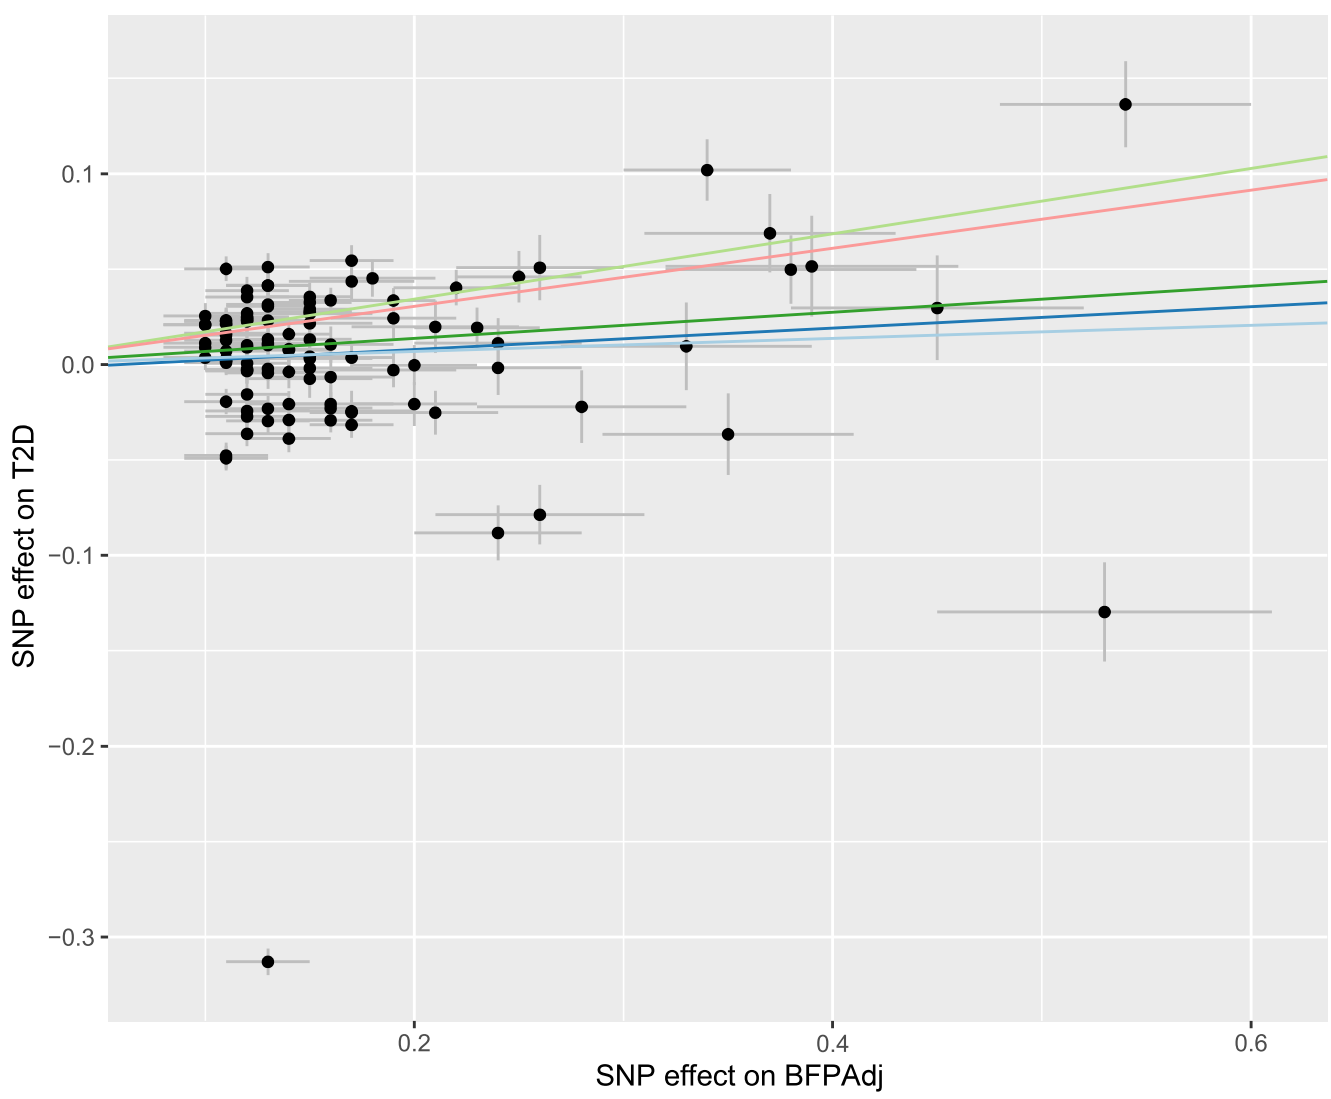

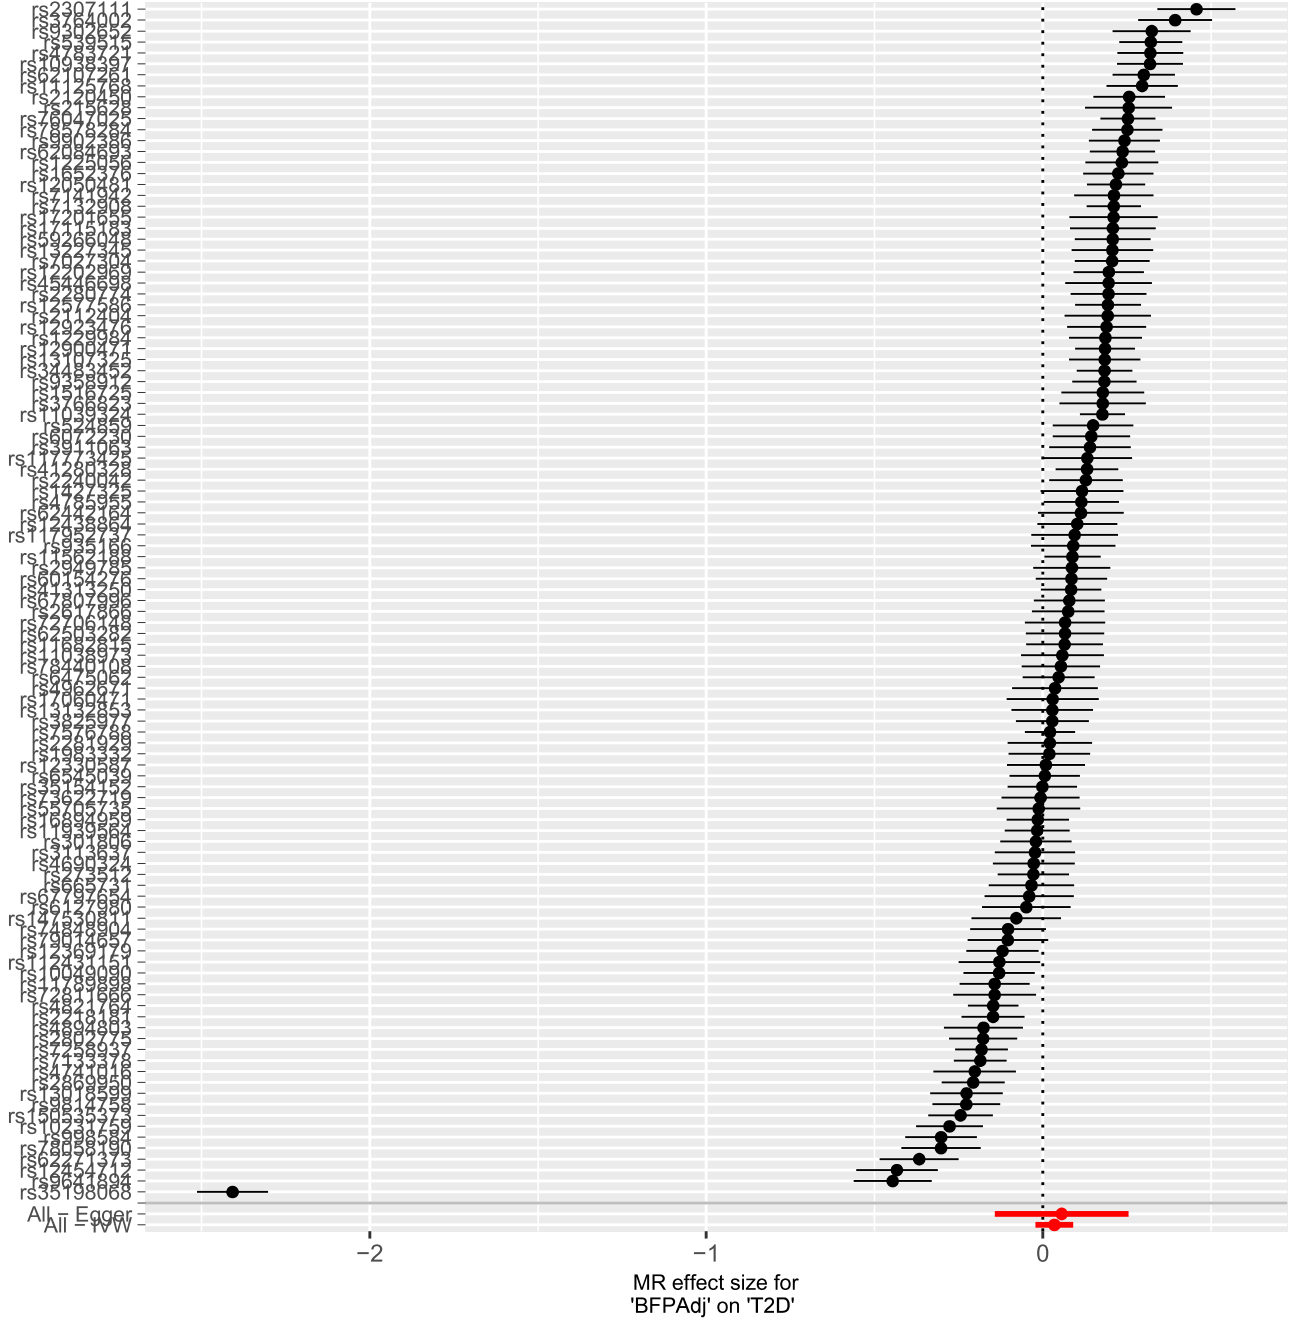

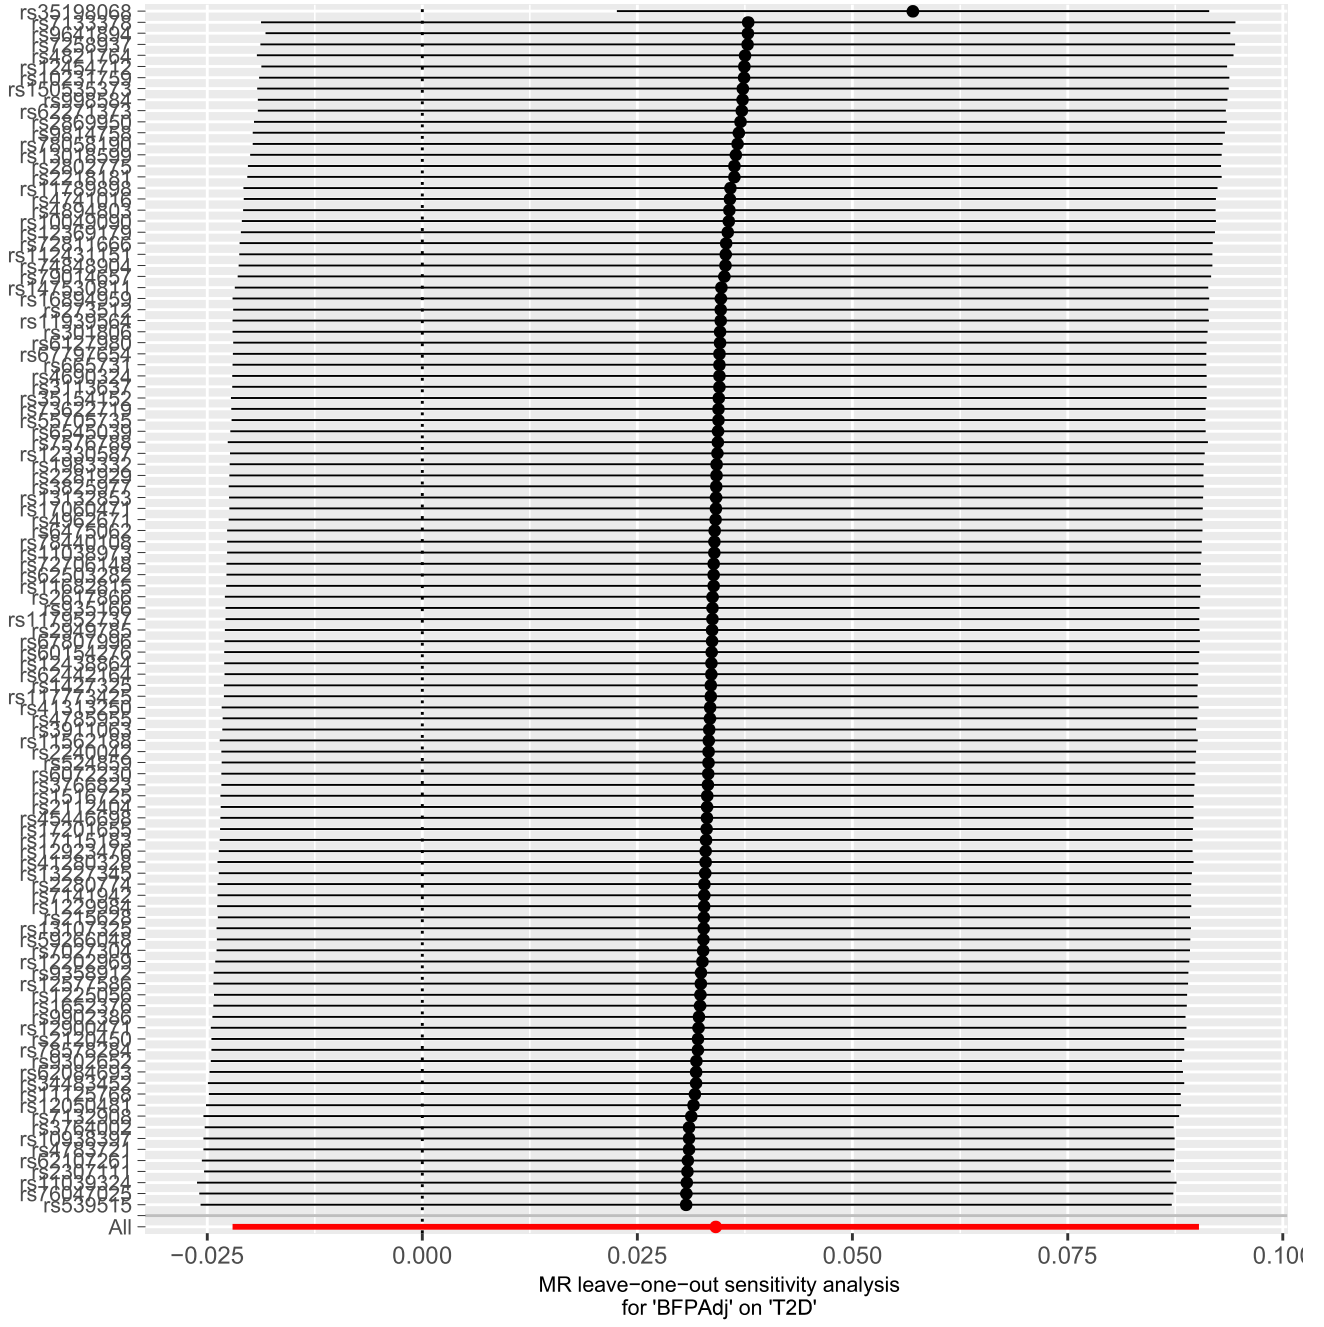



MR Method

- Inverse variance weighted
- MR Egger

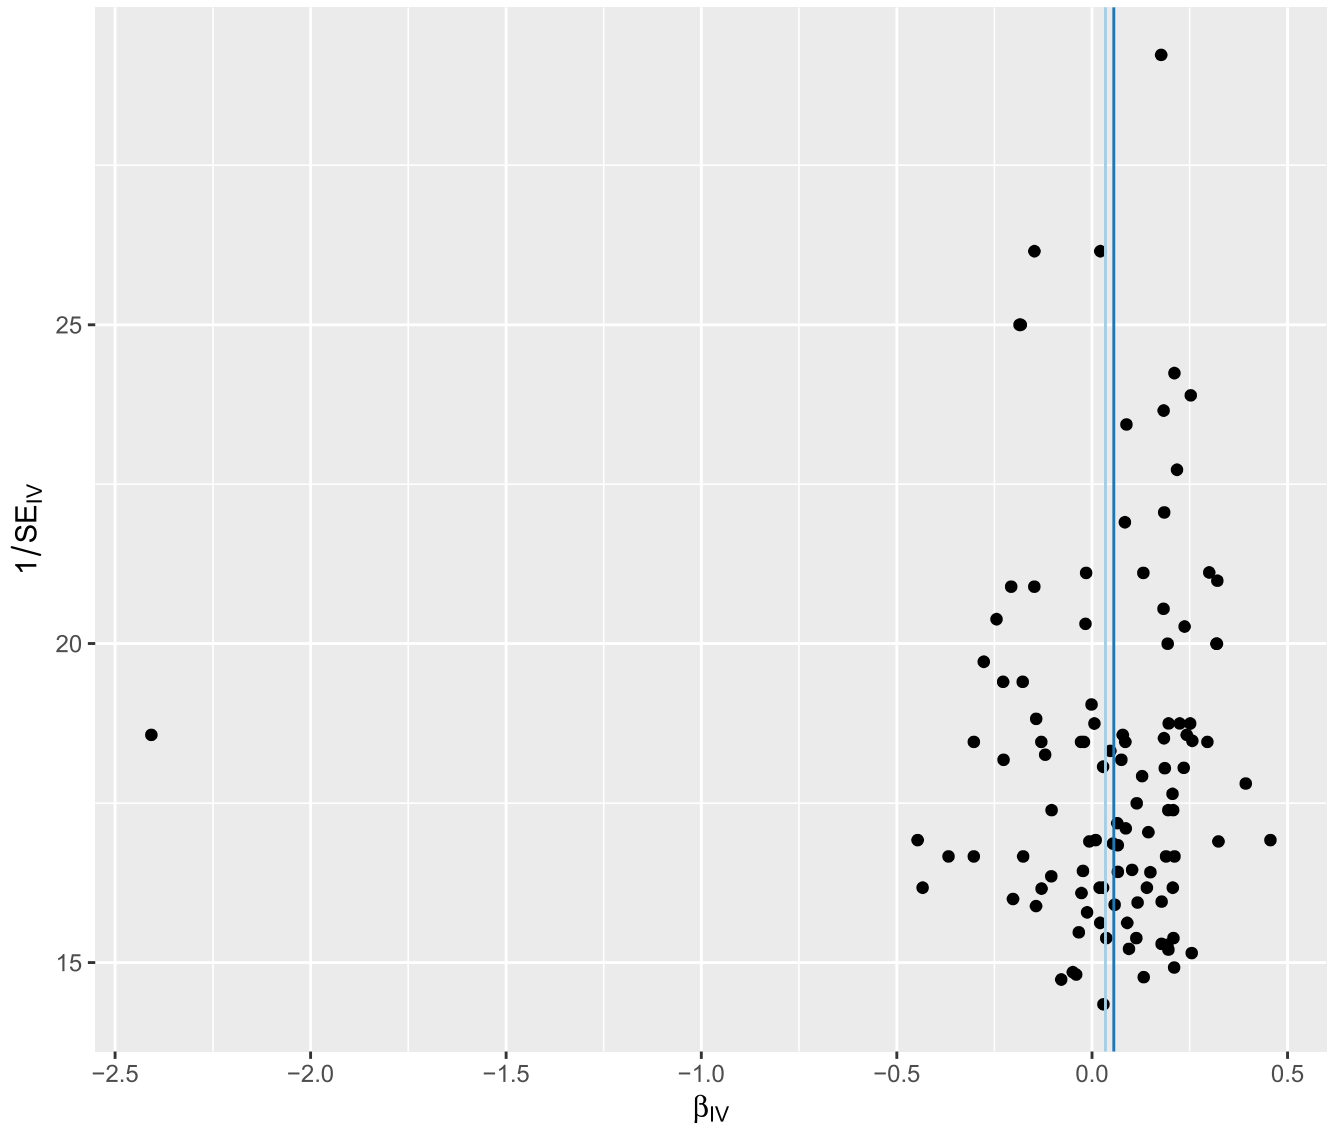

## 2- CAD

MR Test

- Inverse variance weighted
- MR Egger
- Simple mode
- Weighted median
- Weighted mode

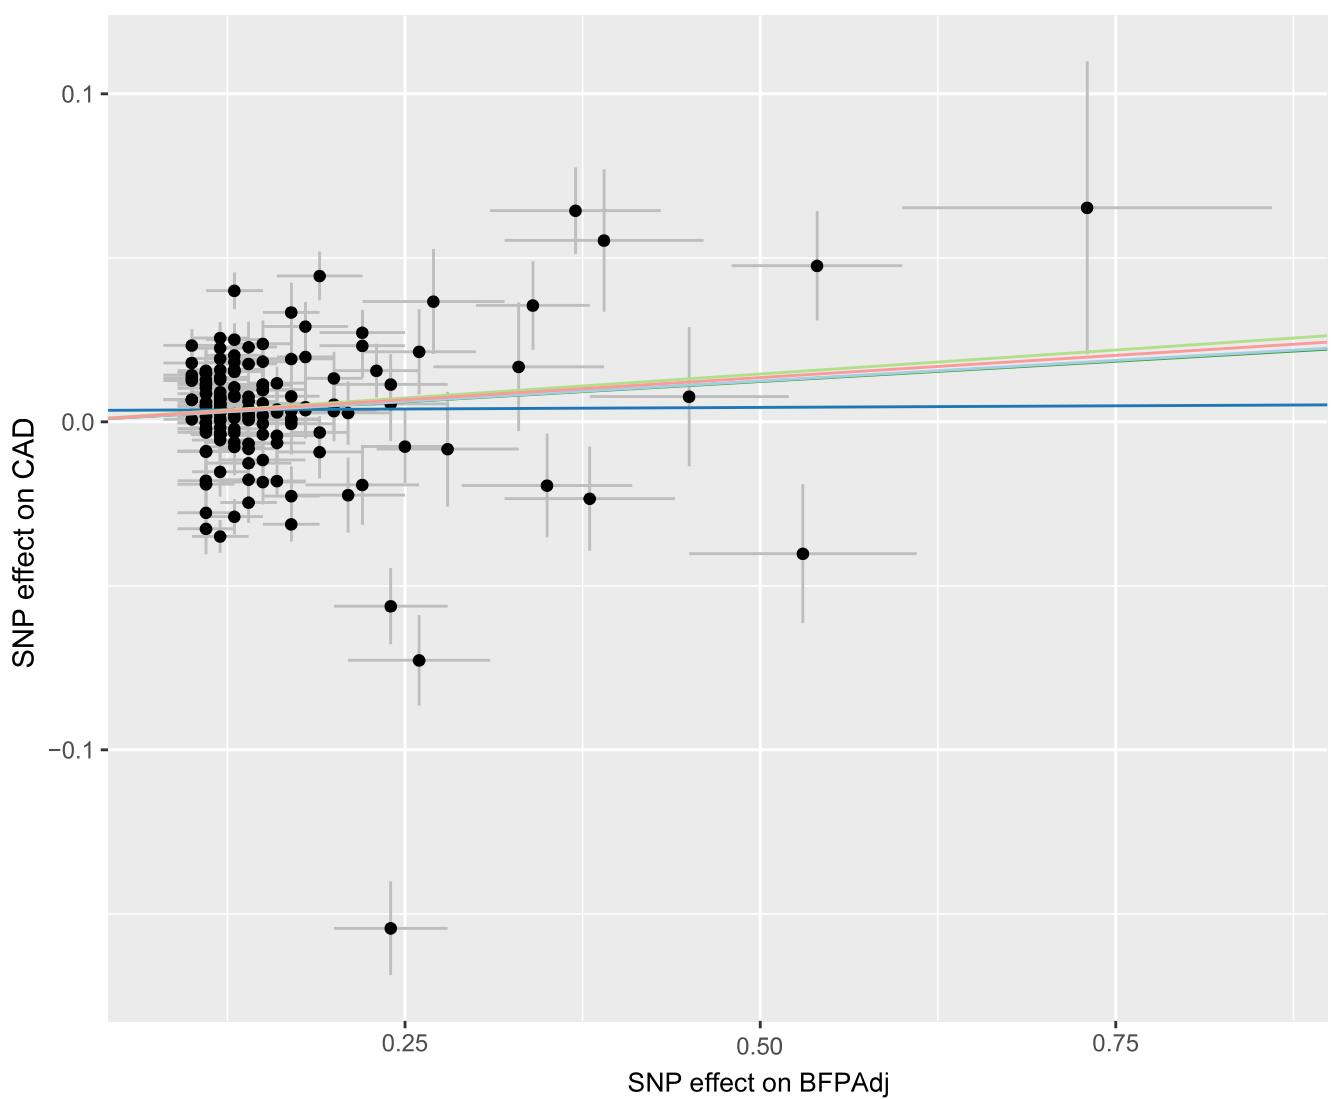

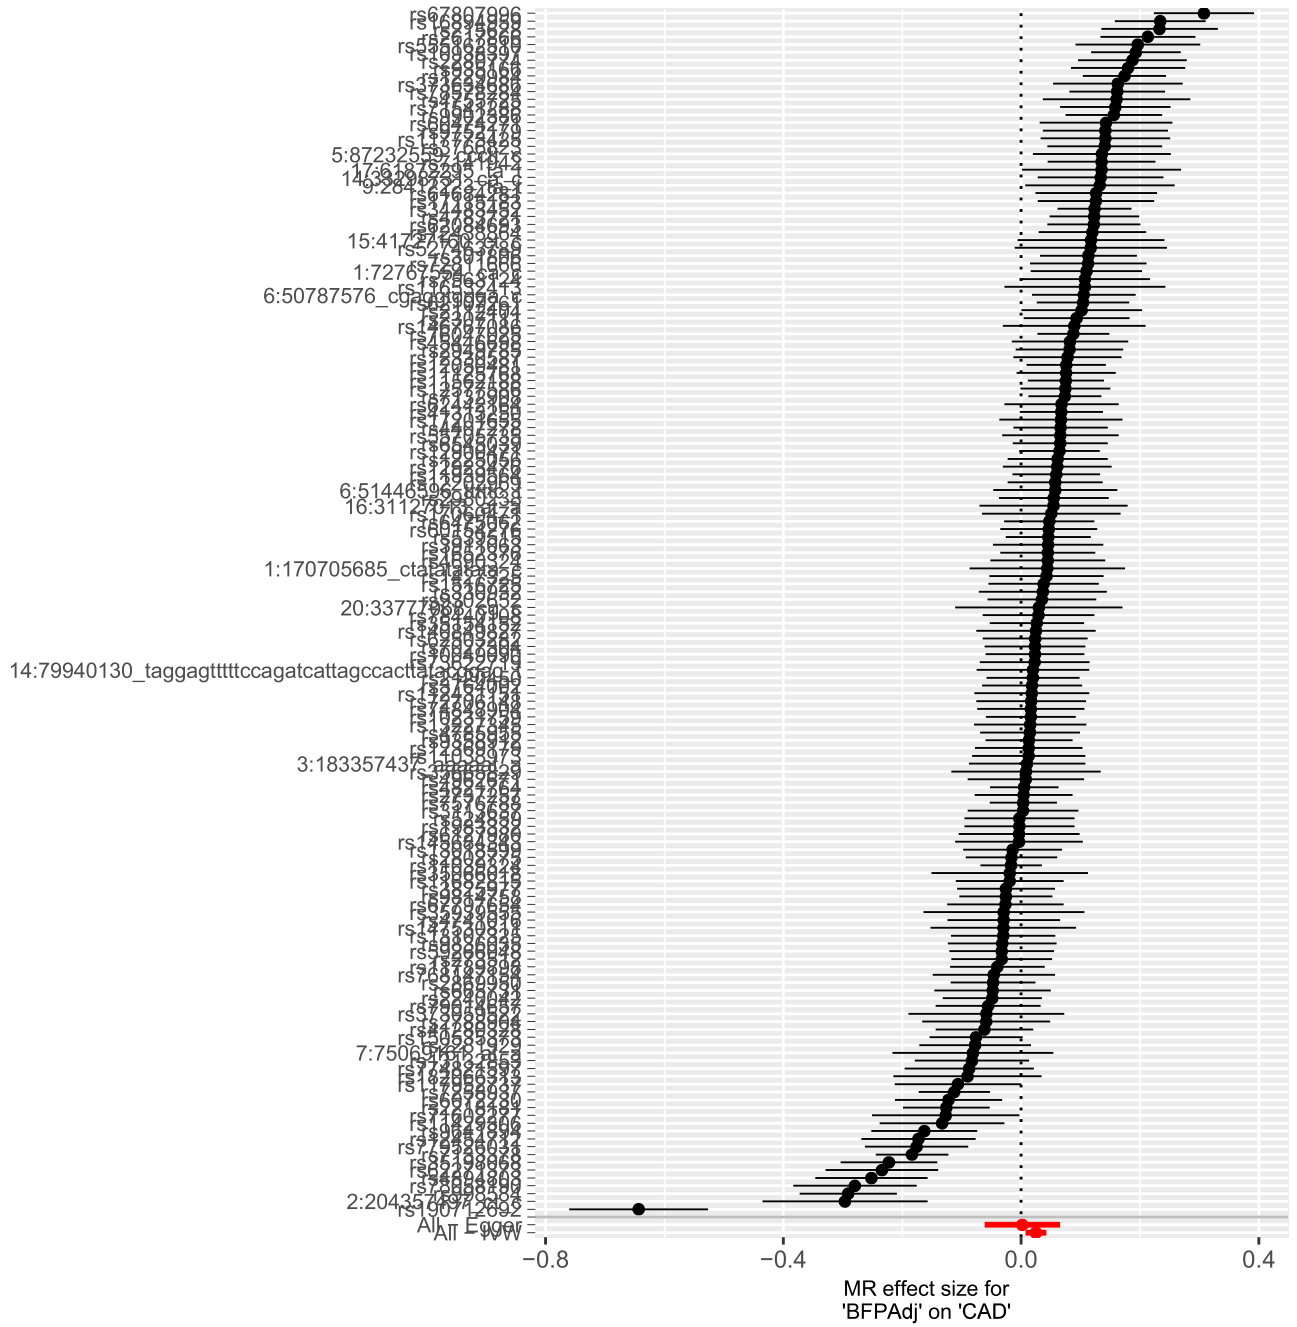

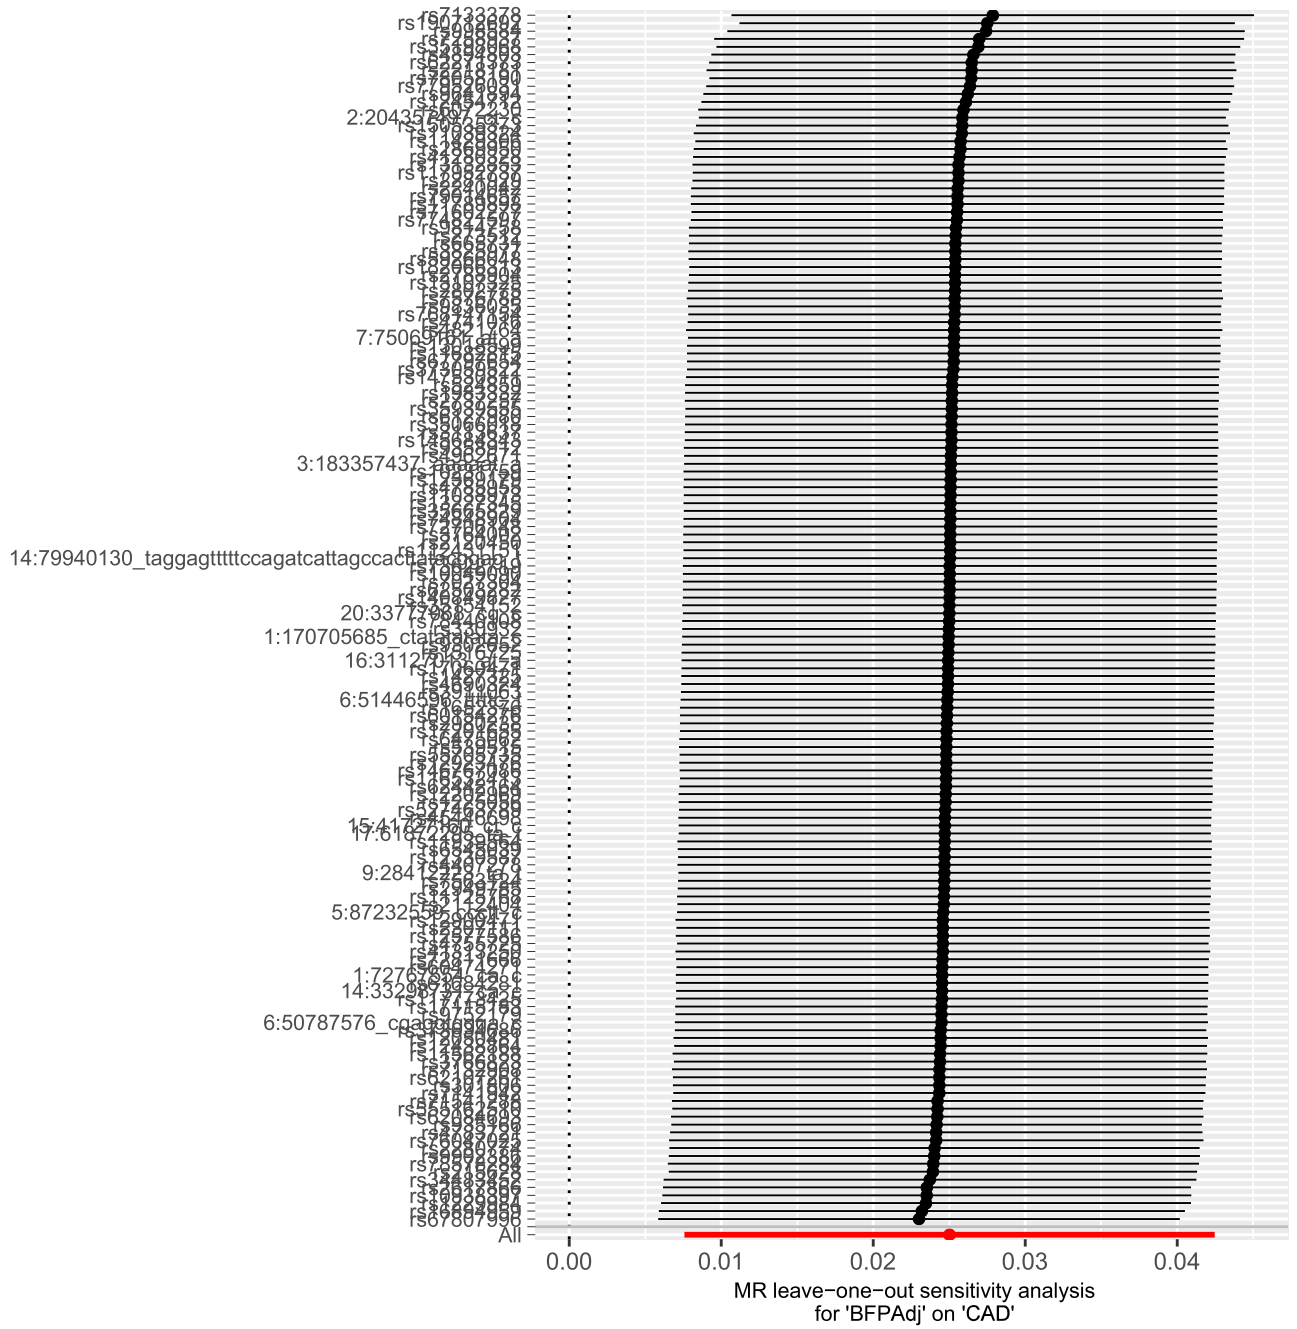

MR Method

- Inverse variance weighted
- MR Egger

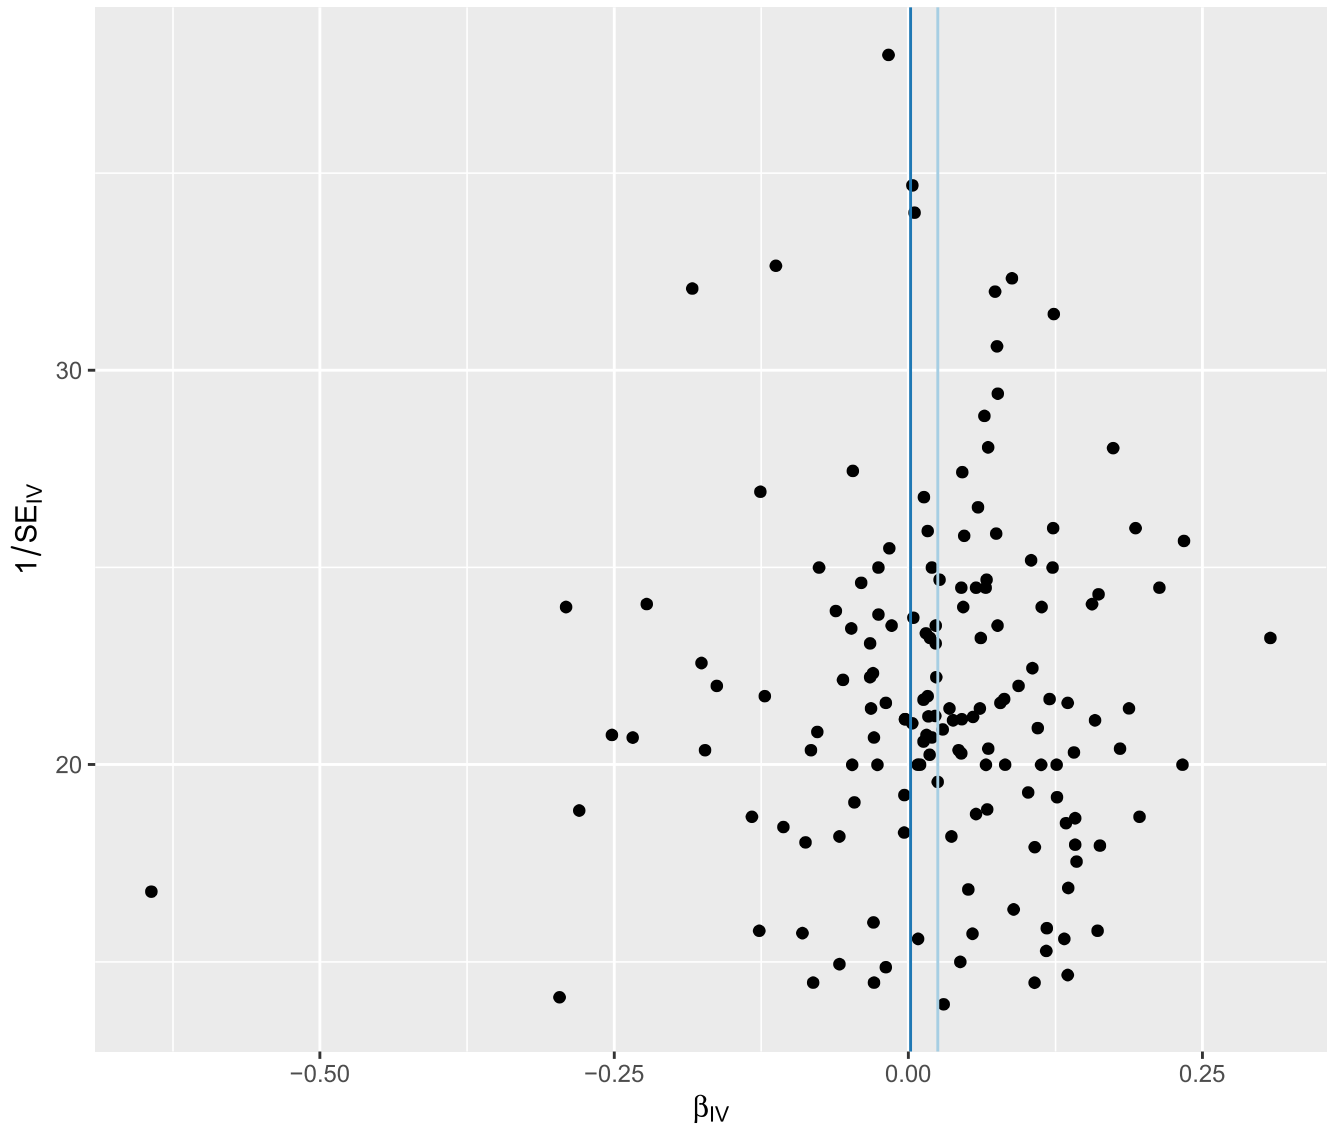

## 3- HDL

MR Test

- Inverse variance weighted
- MR Egger
- Simple mode
- Weighted median
- Weighted mode

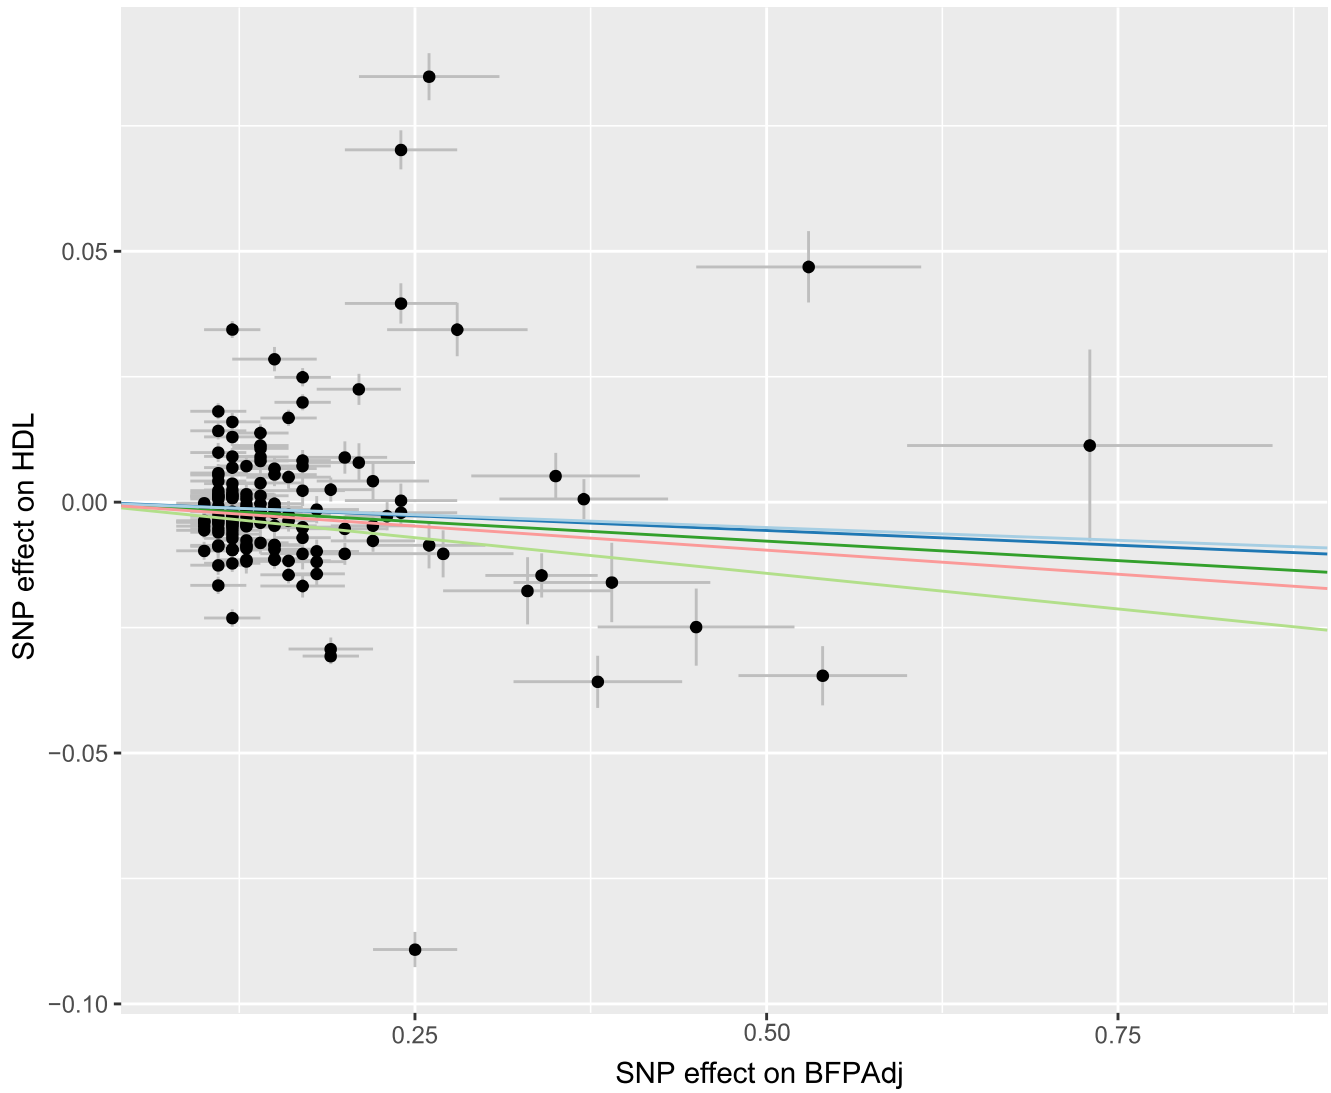





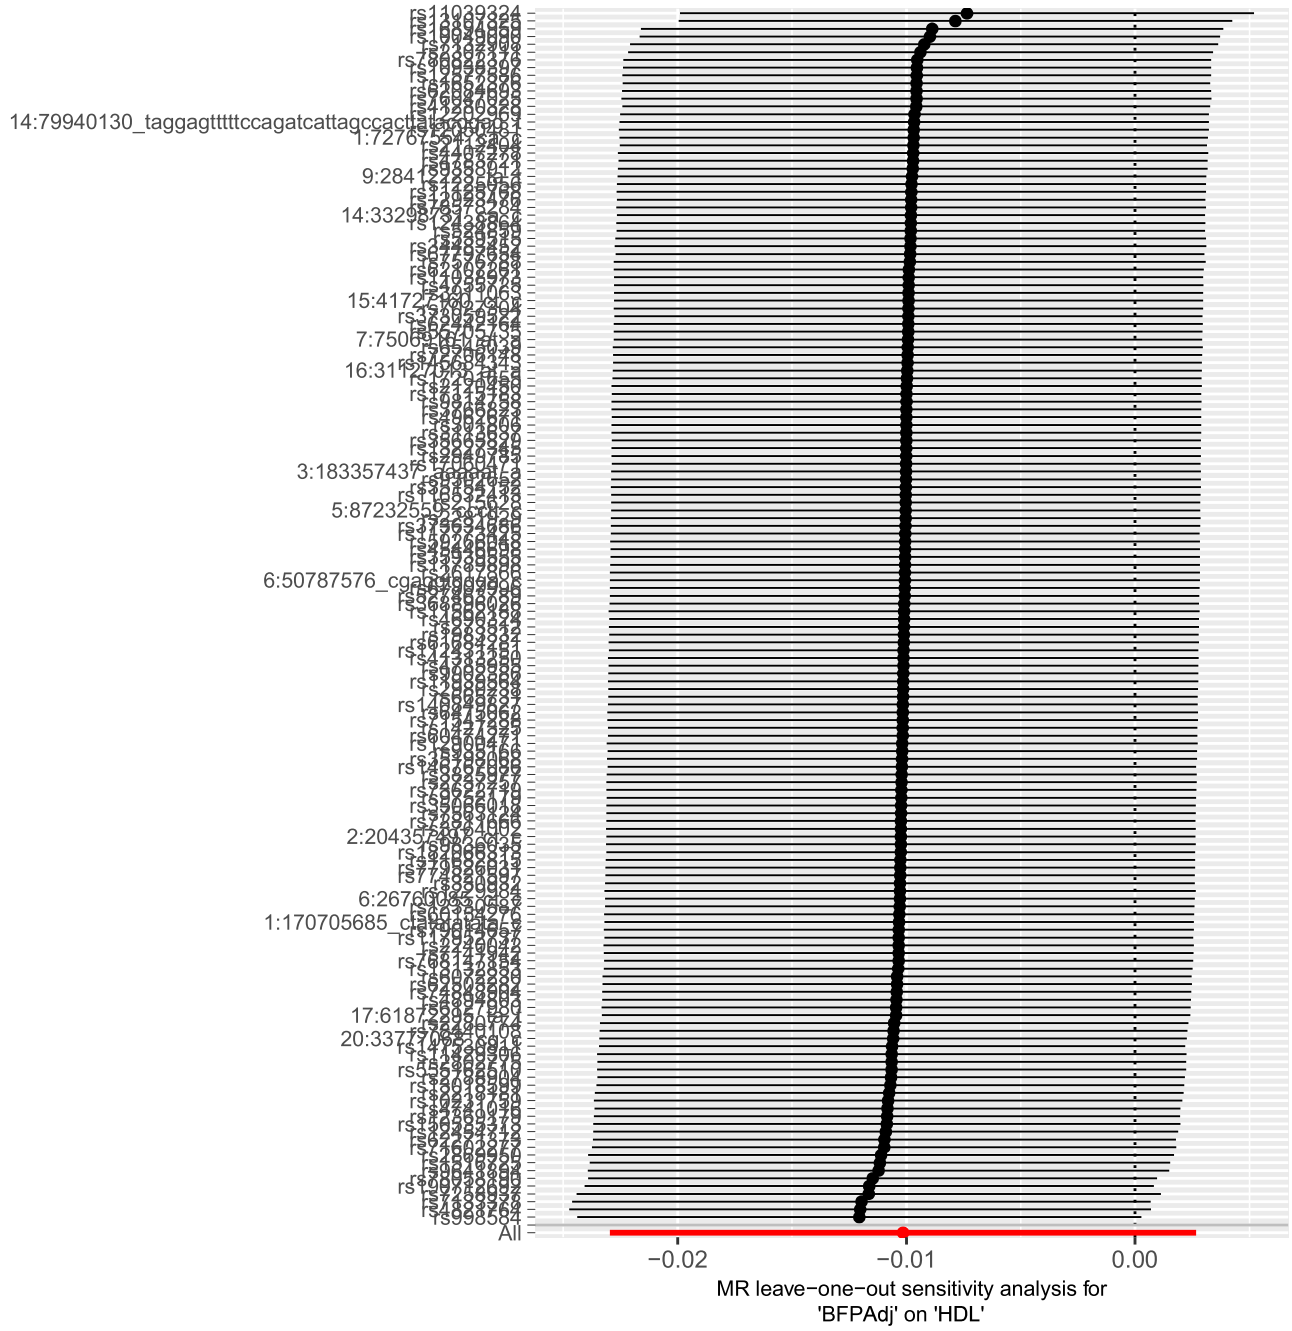

MR Method

- Inverse variance weighted
- MR Egger

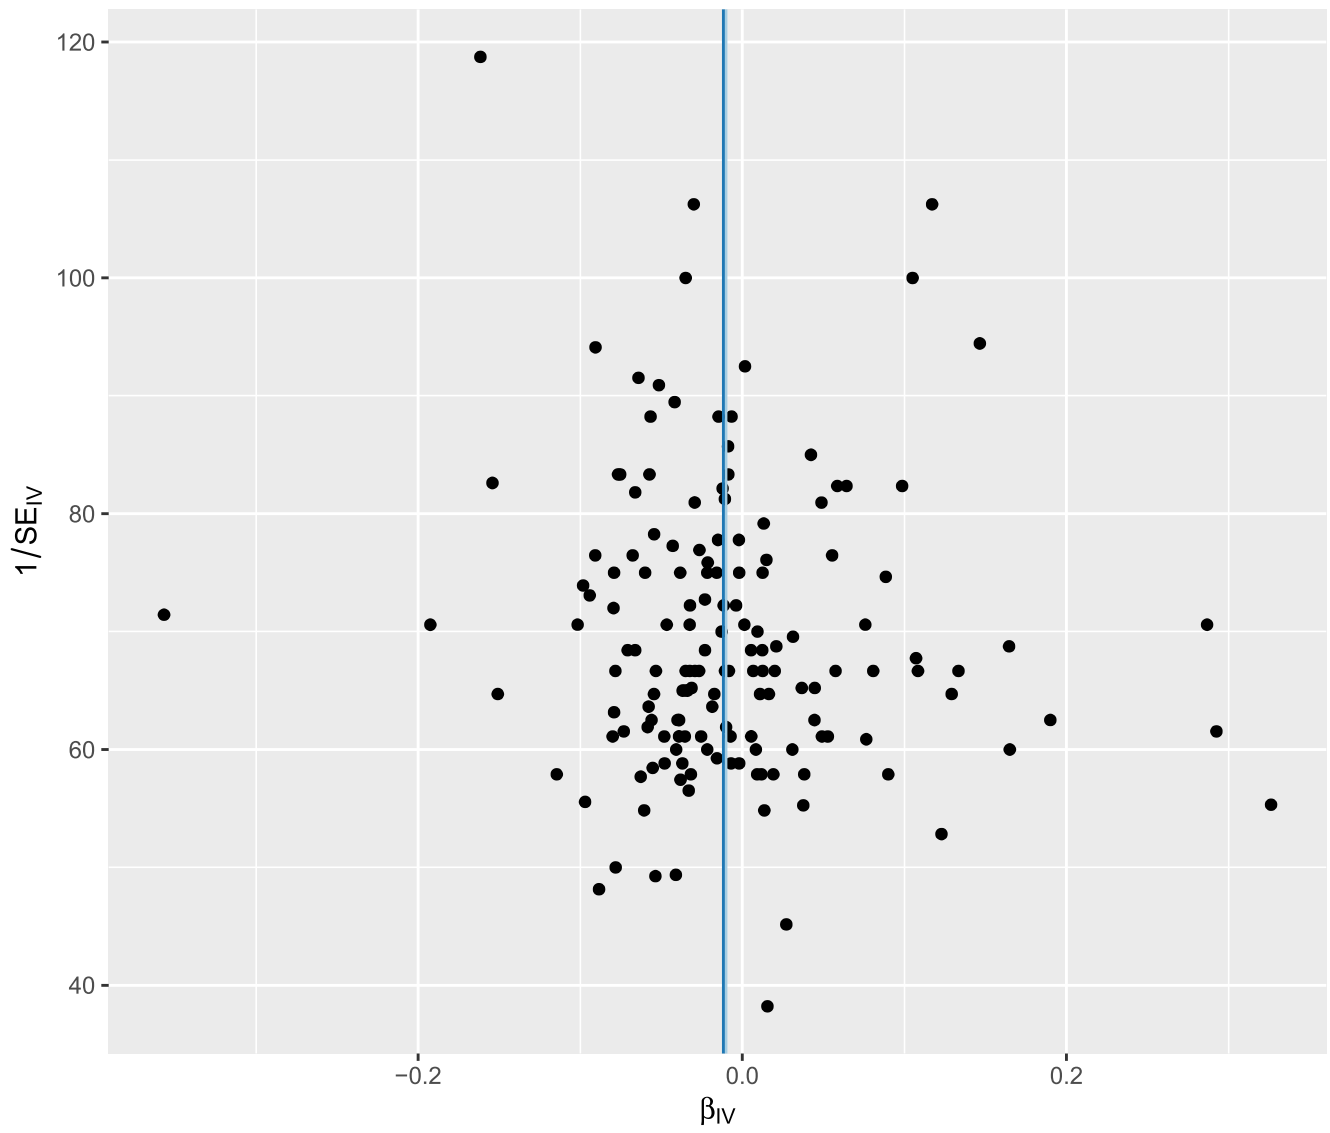

**4- TG**

MR Test

- Inverse variance weighted
- MR Egger
- Simple mode
- Weighted median
- Weighted mode

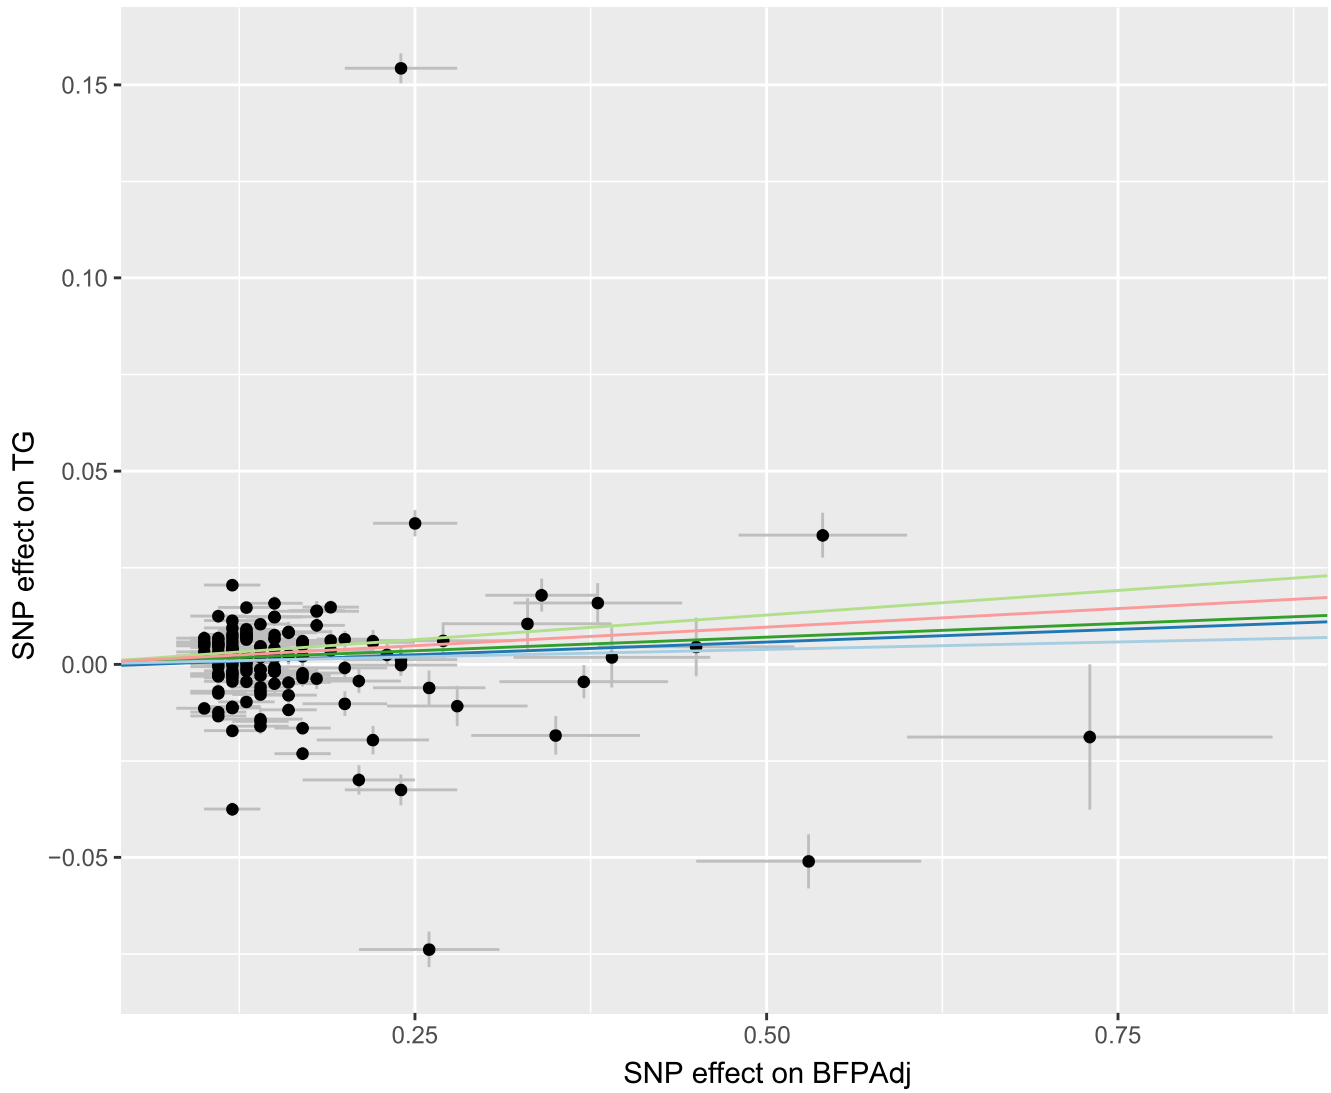

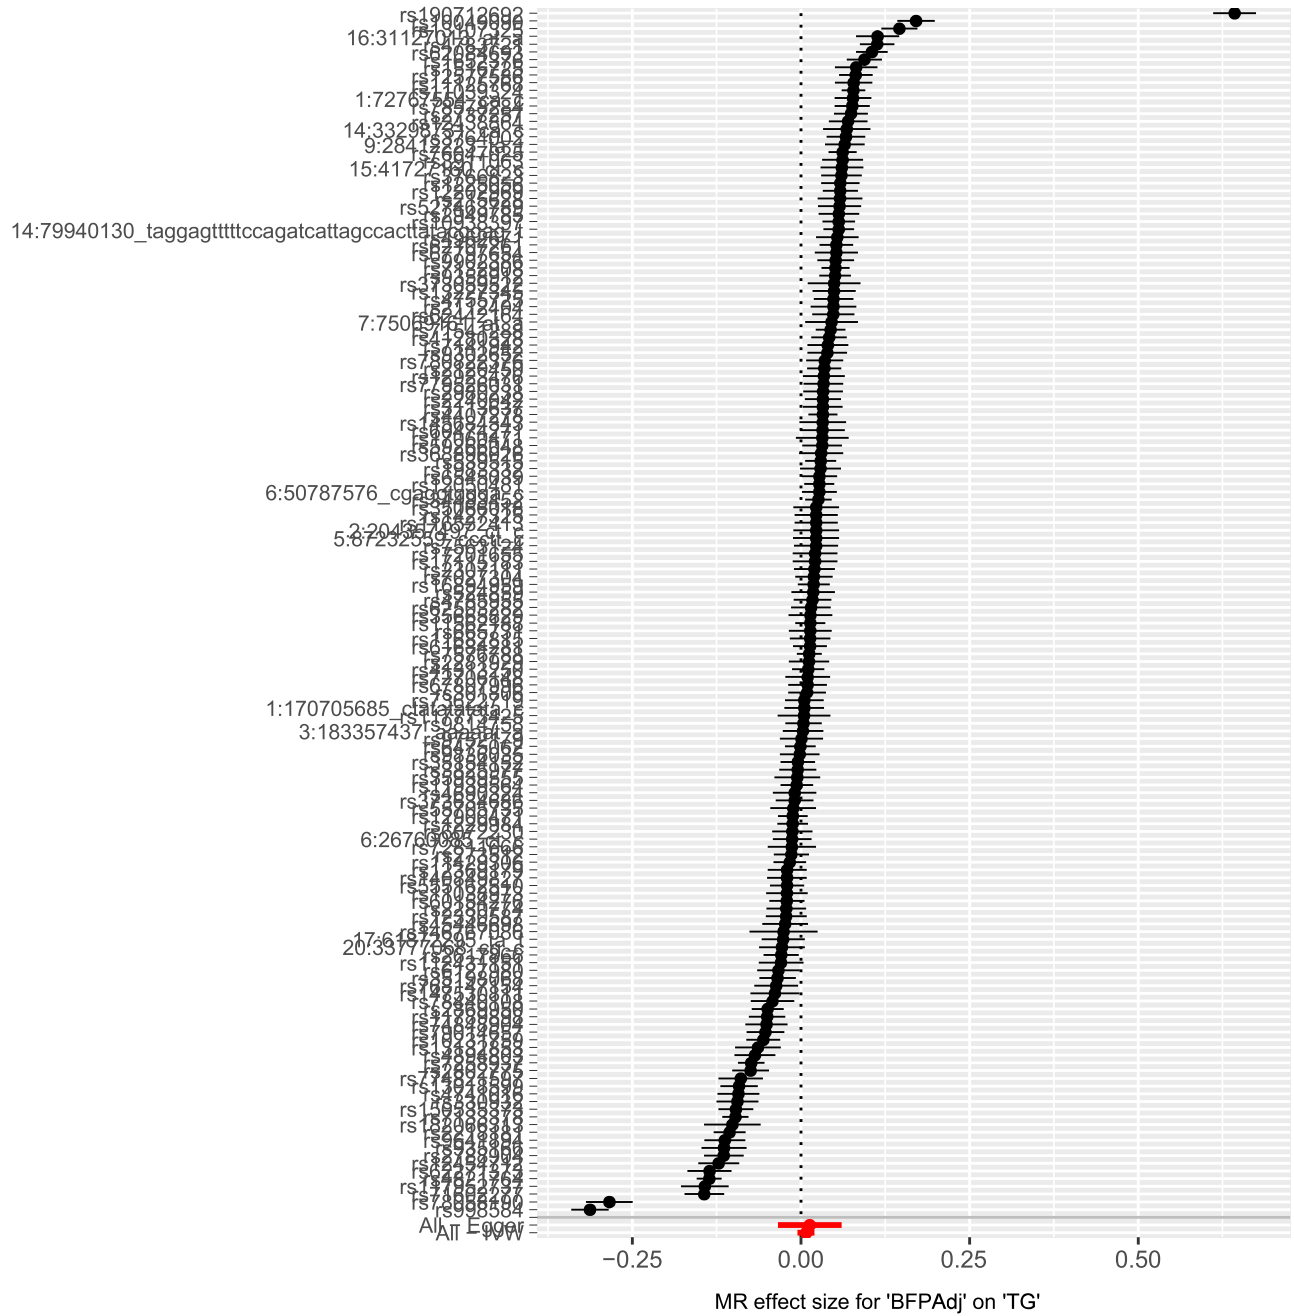



MR Method

- Inverse variance weighted
- MR Egger

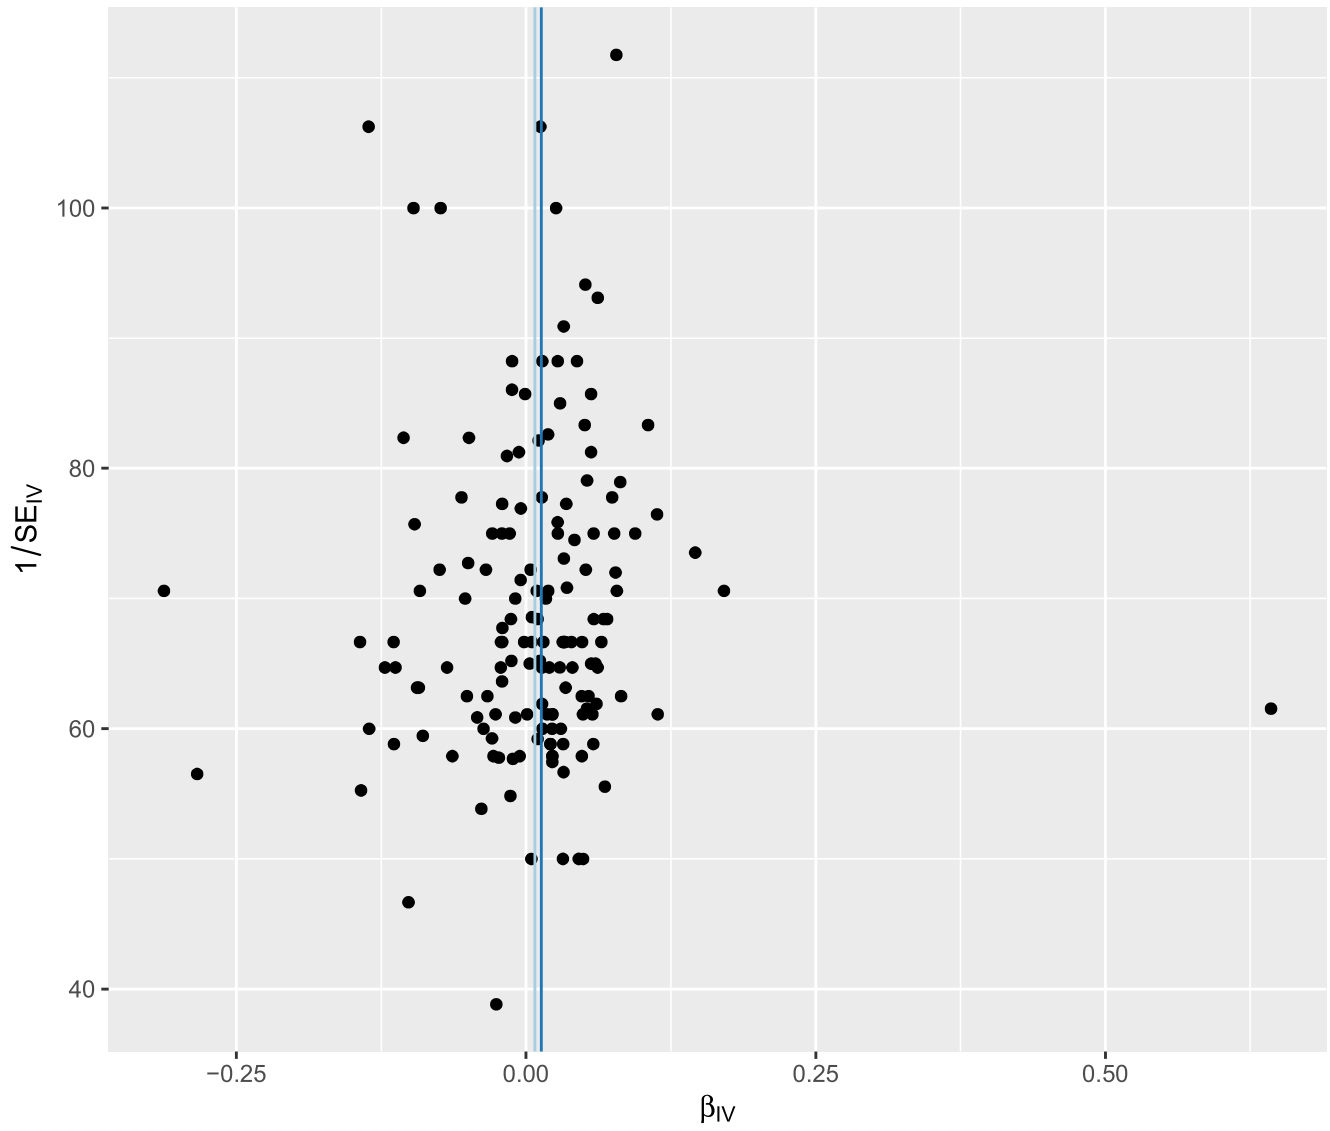



# **MR Analysis in Females**

## **1- T2D**

MR Test

- Inverse variance weighted
- MR Egger
- Simple mode
- Weighted median
- Weighted mode

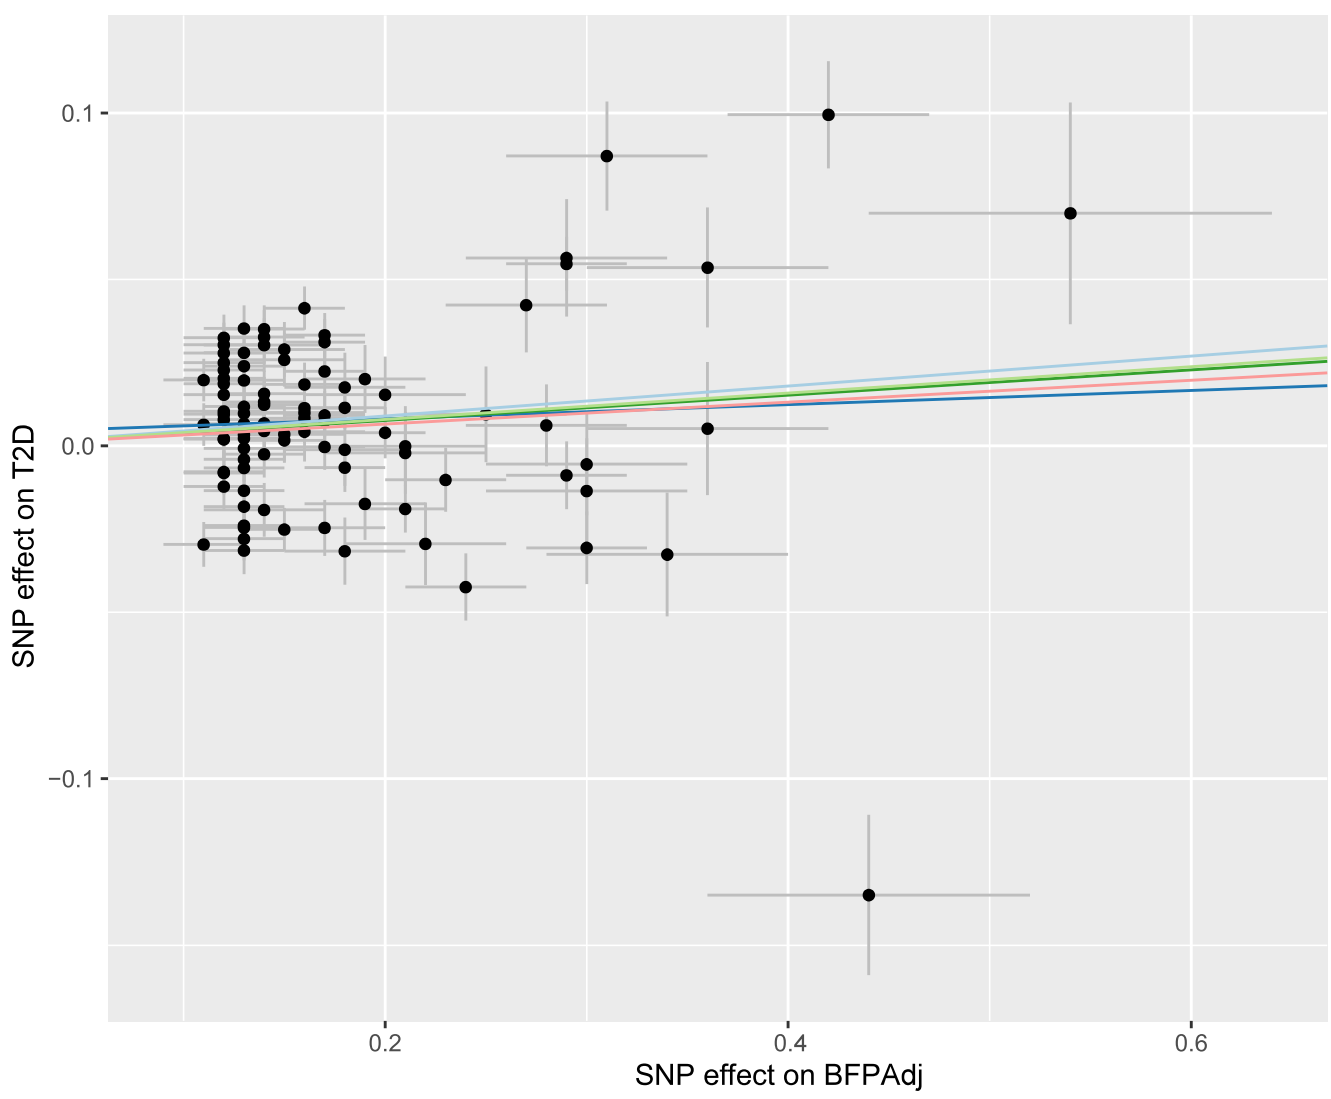

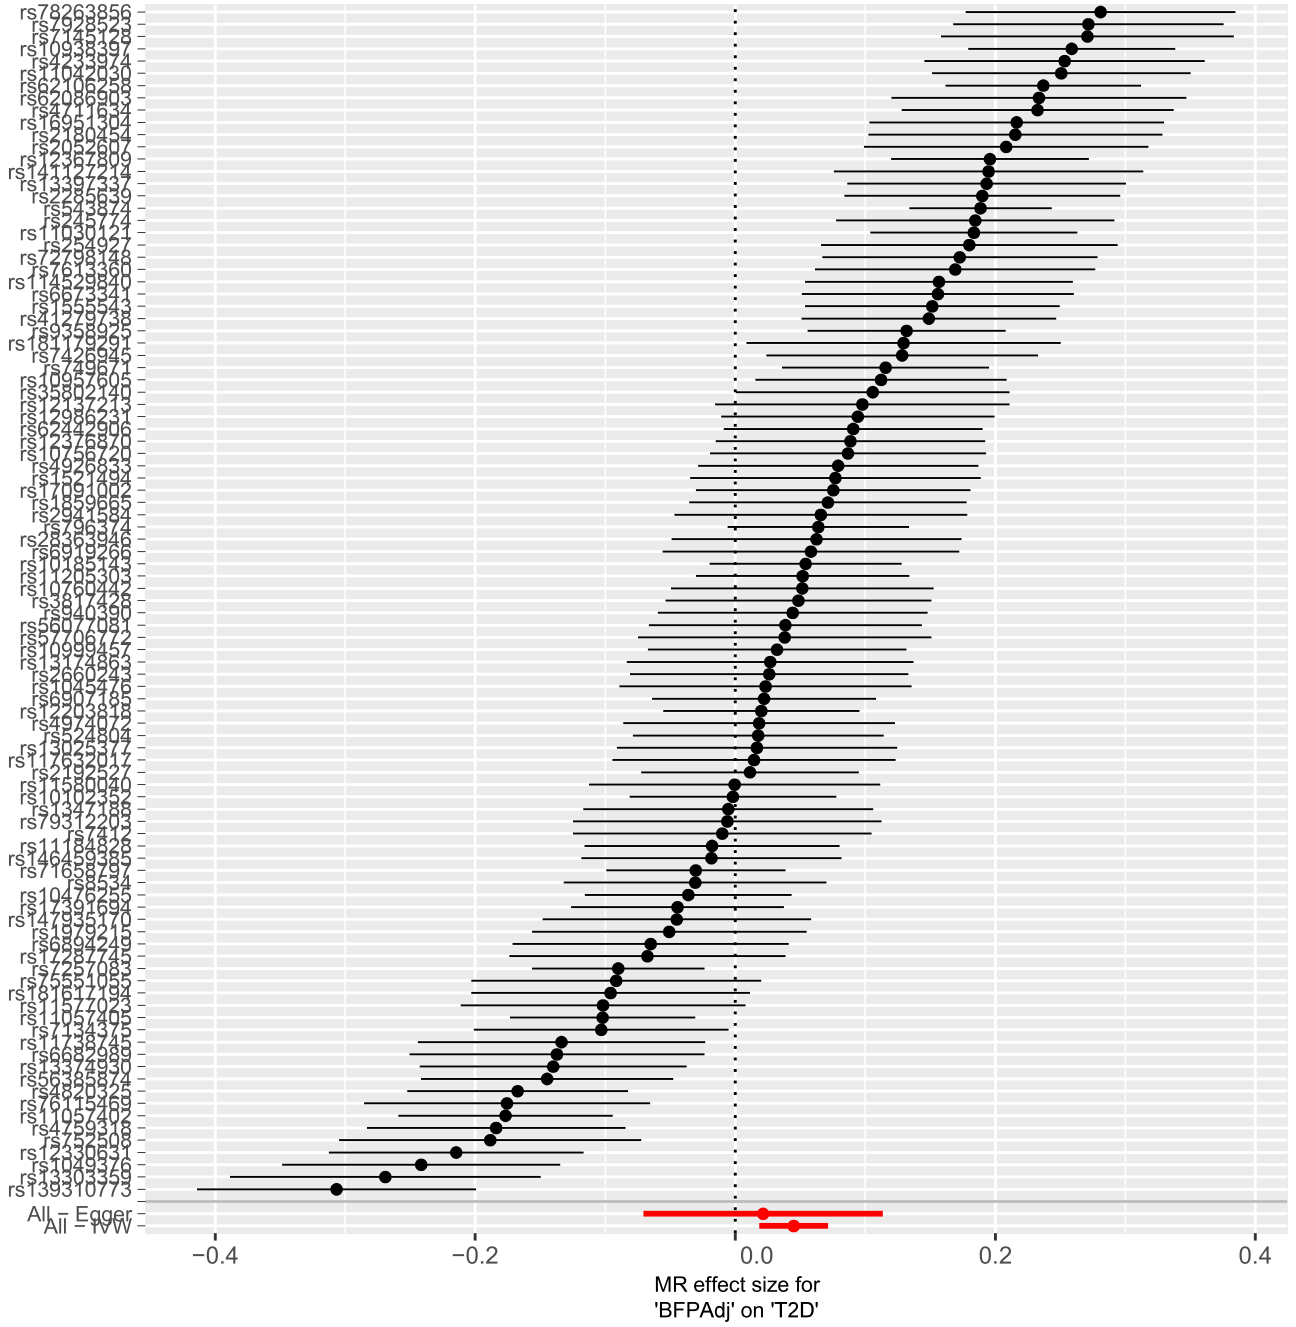

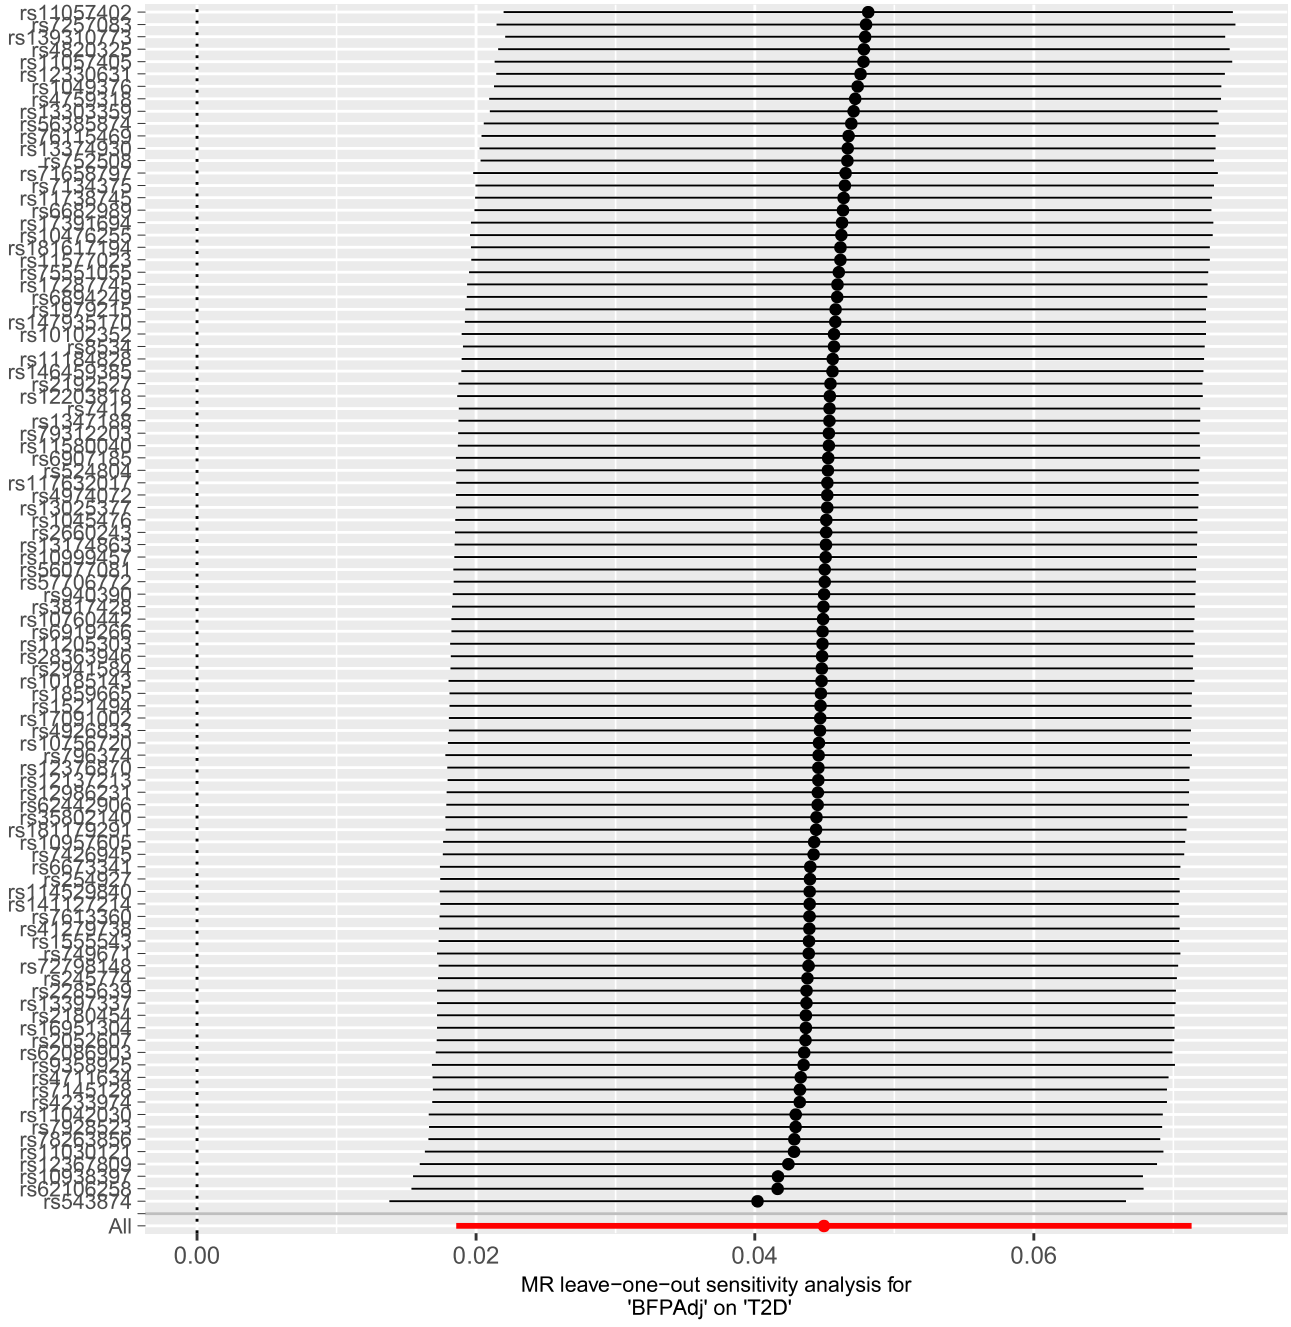

MR Method

- Inverse variance weighted
- MR Egger

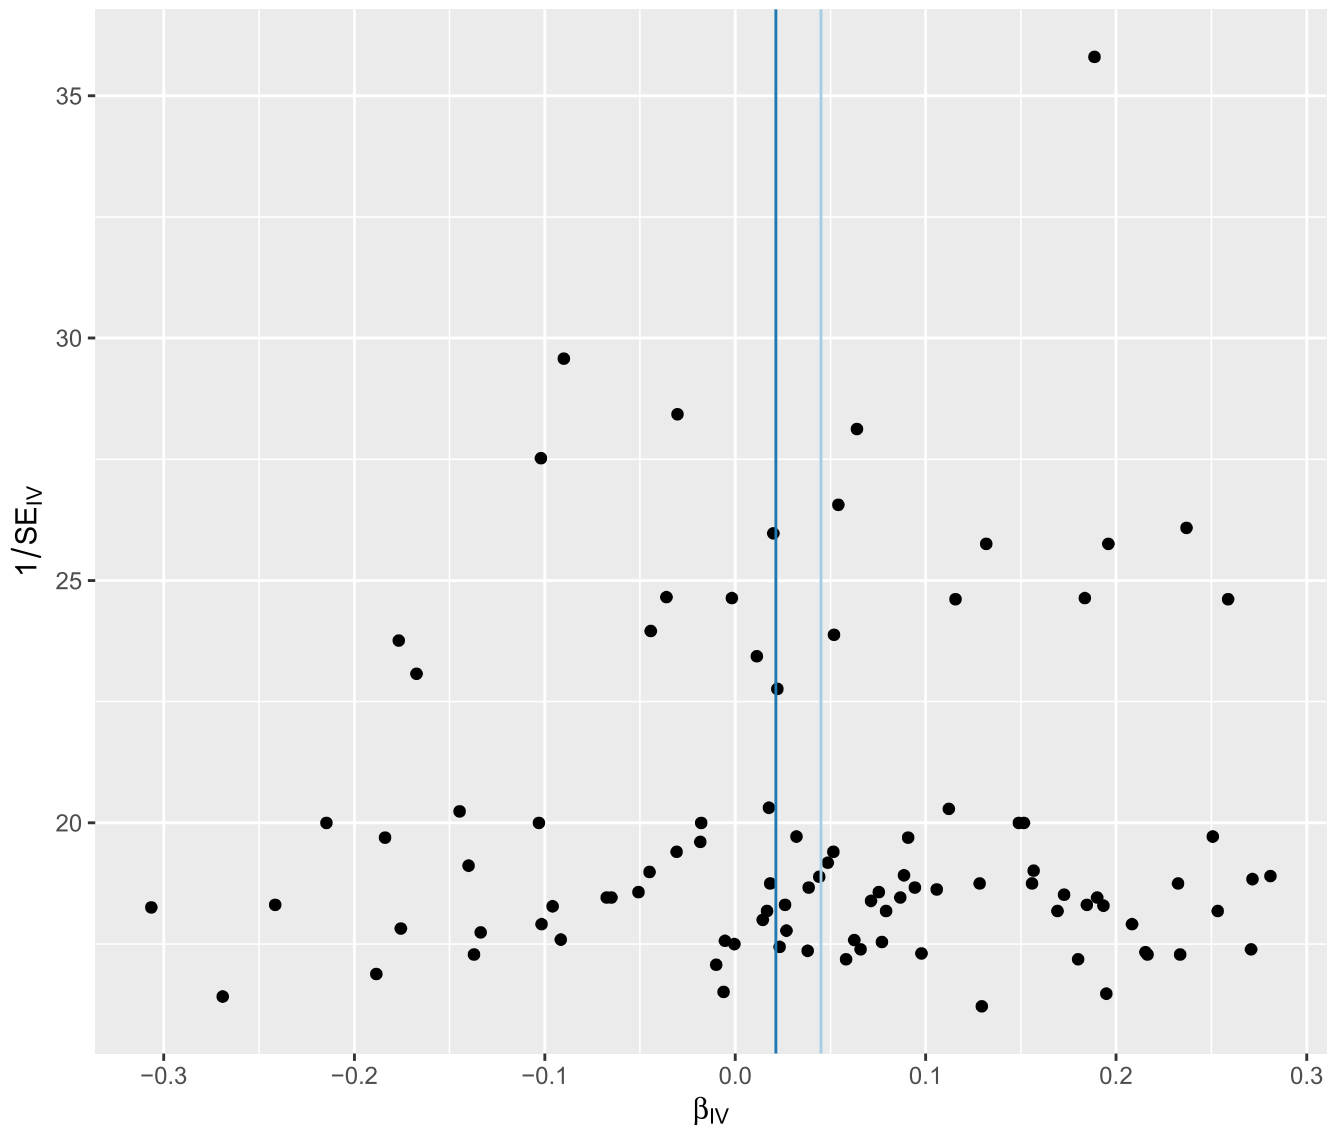

## 2- CAD

MR Test

- Inverse variance weighted
- MR Egger
- Simple mode
- Weighted median
- Weighted mode

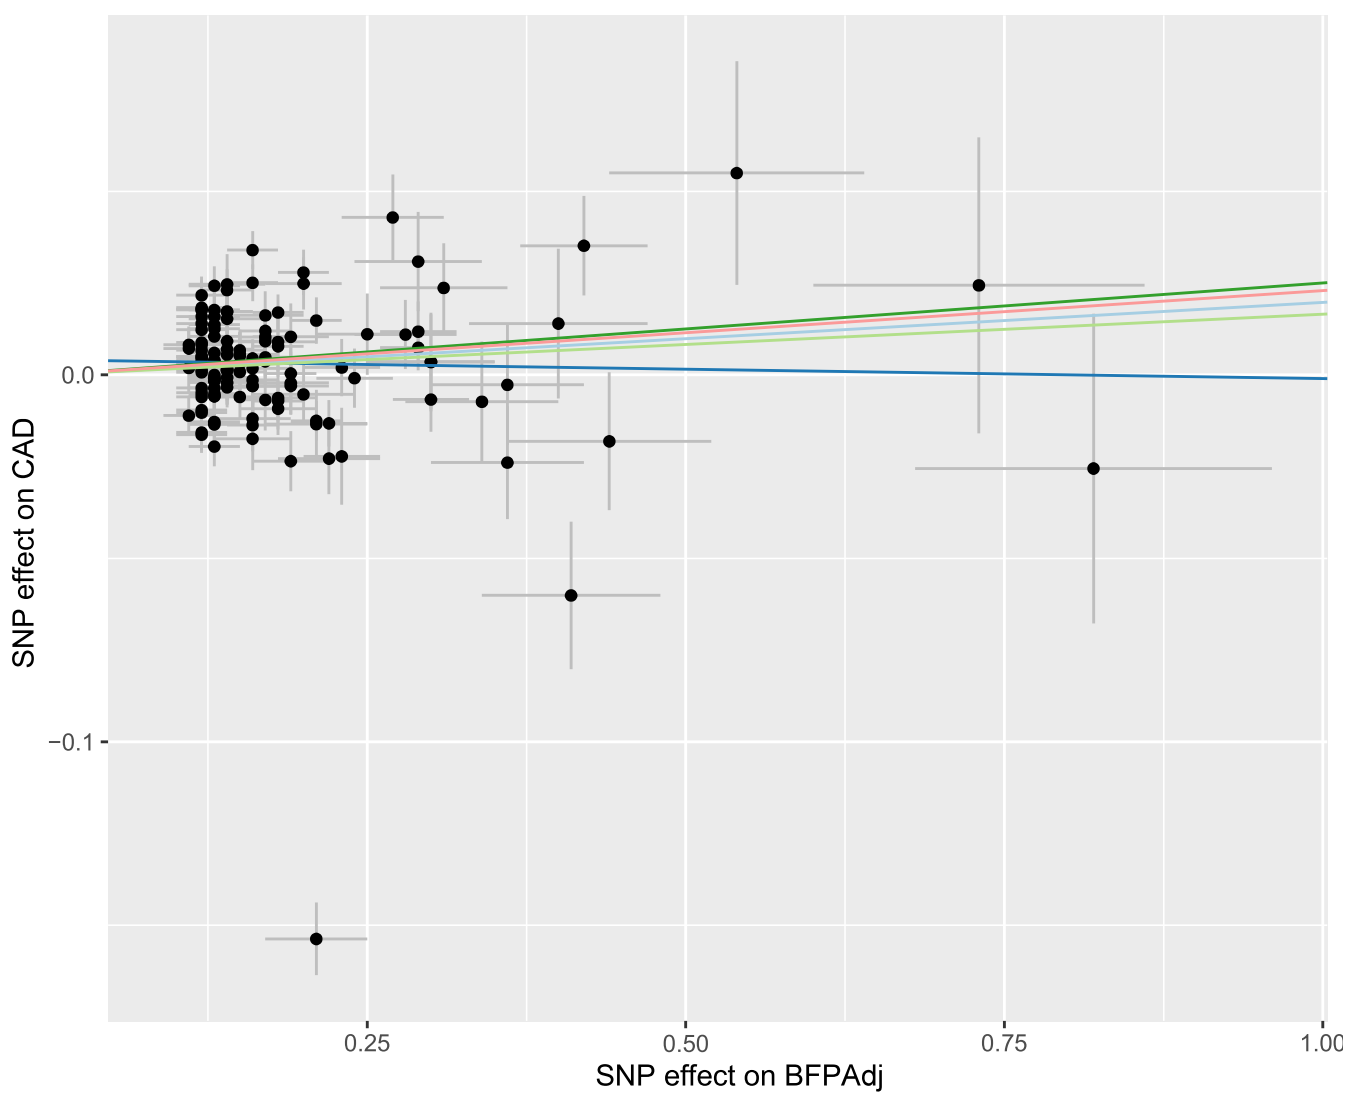

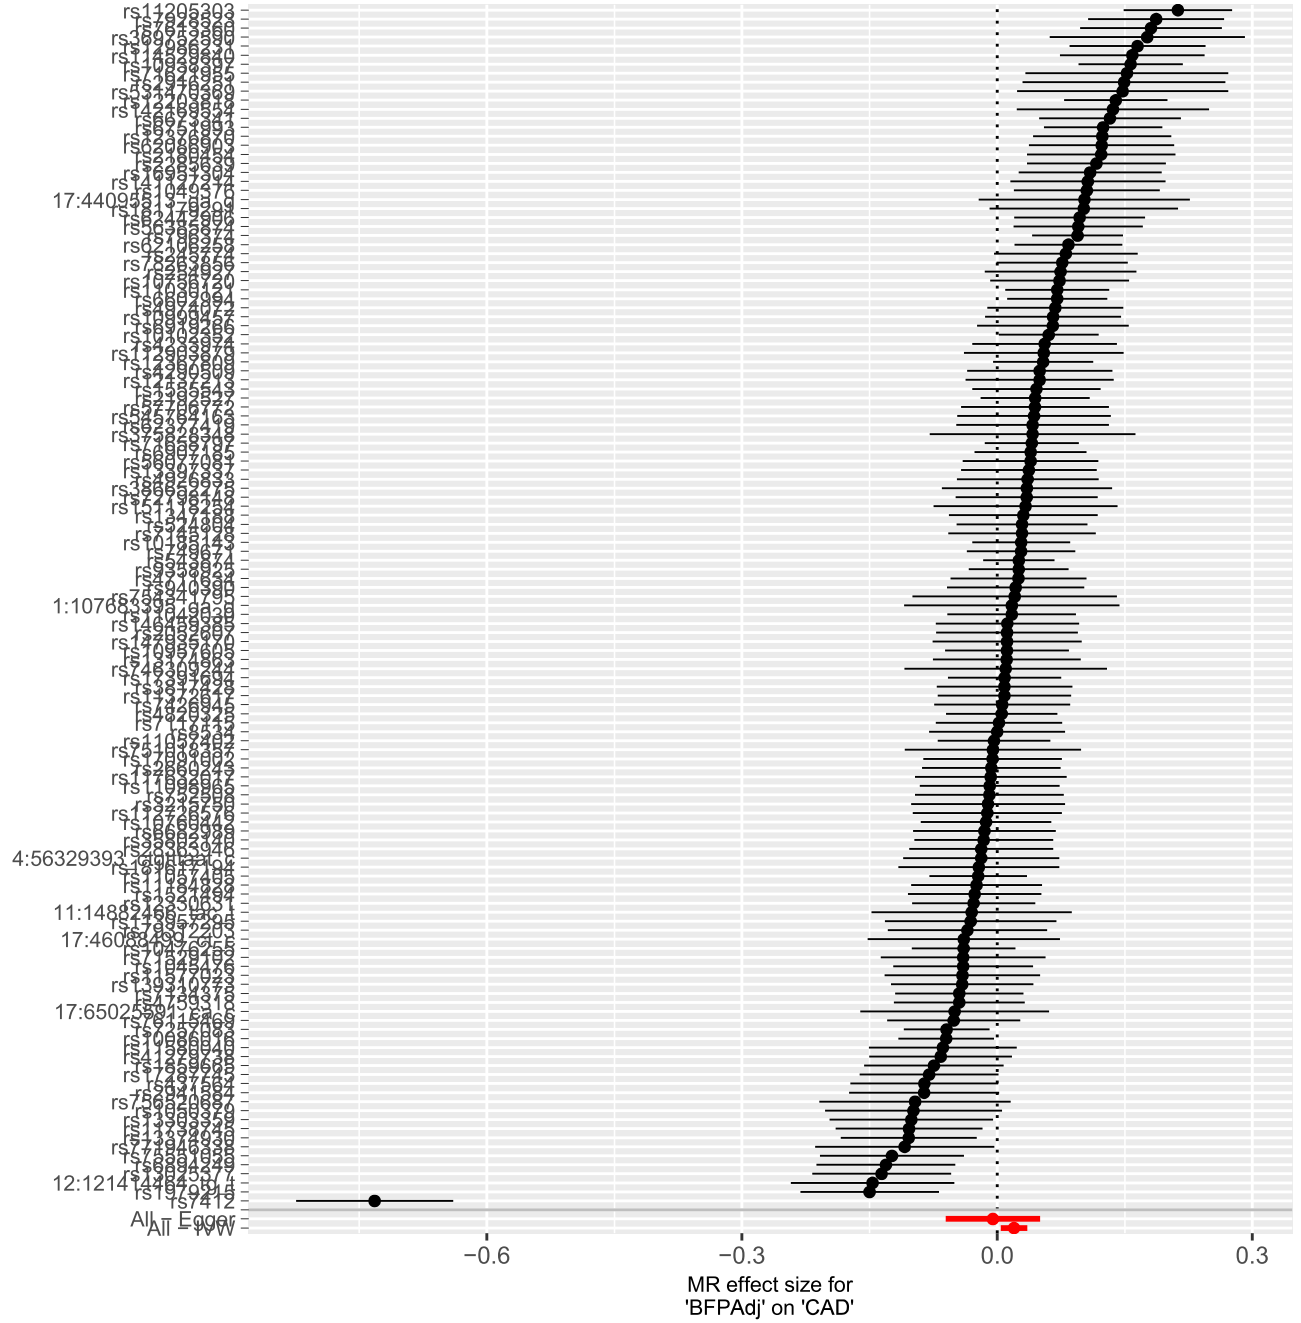



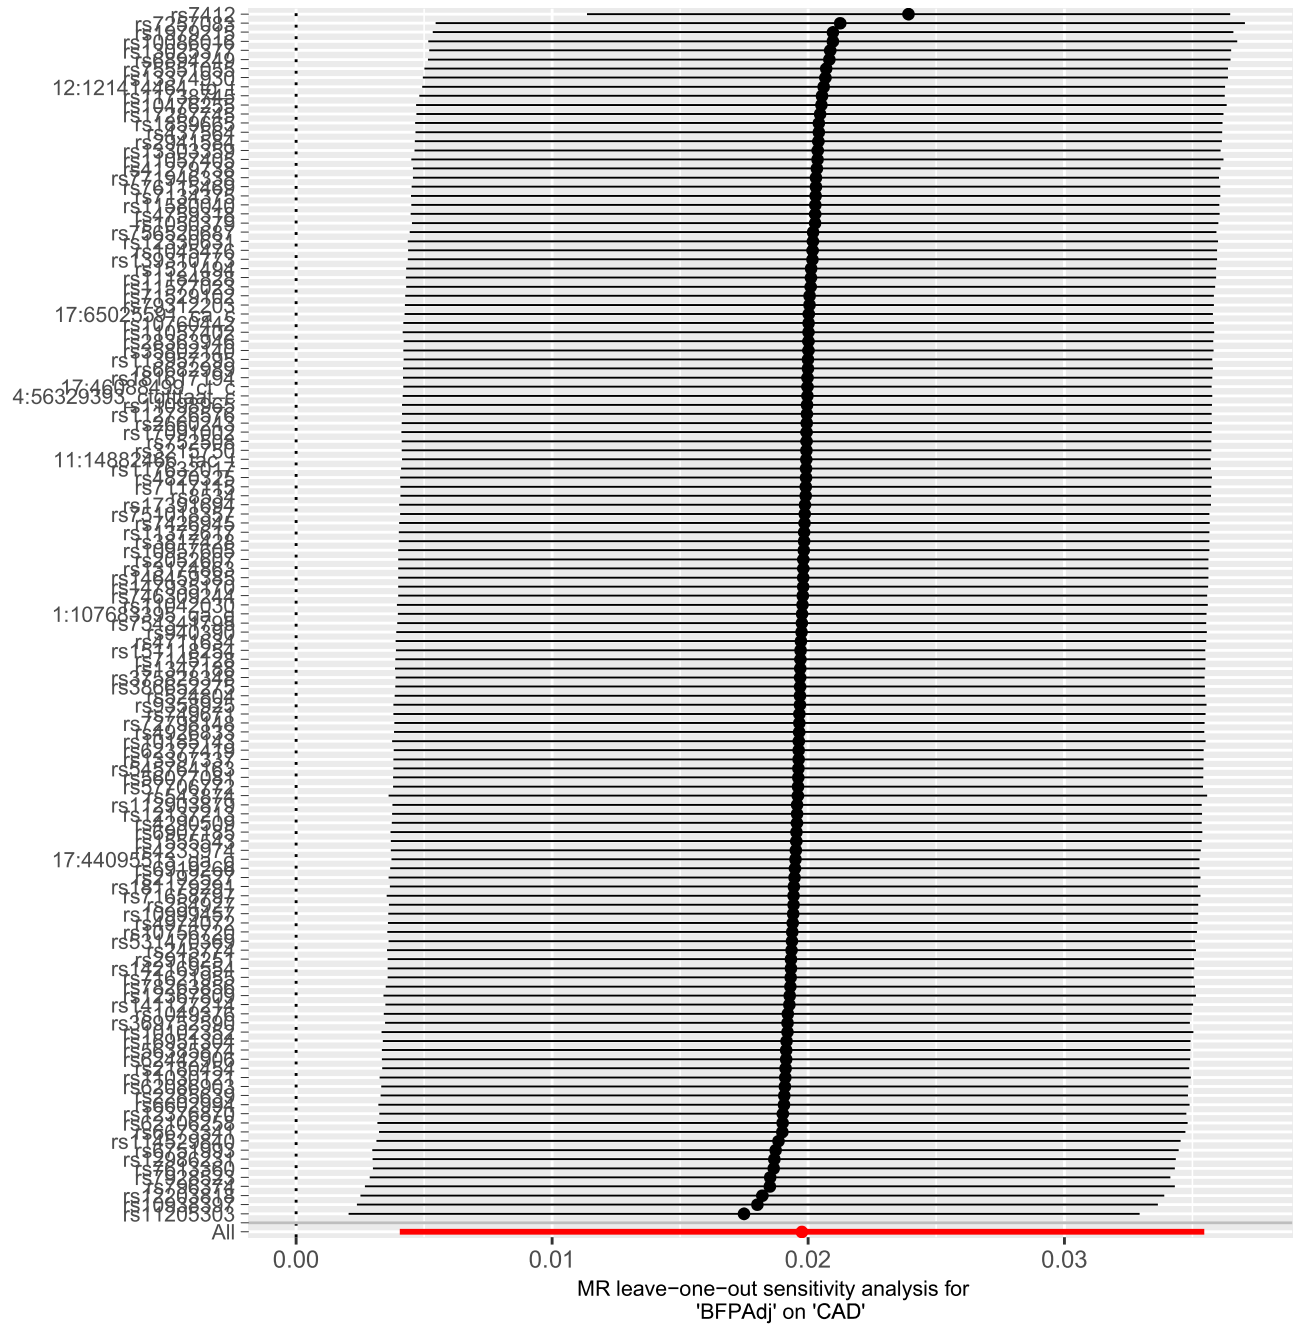

MR Method

- Inverse variance weighted
- MR Egger

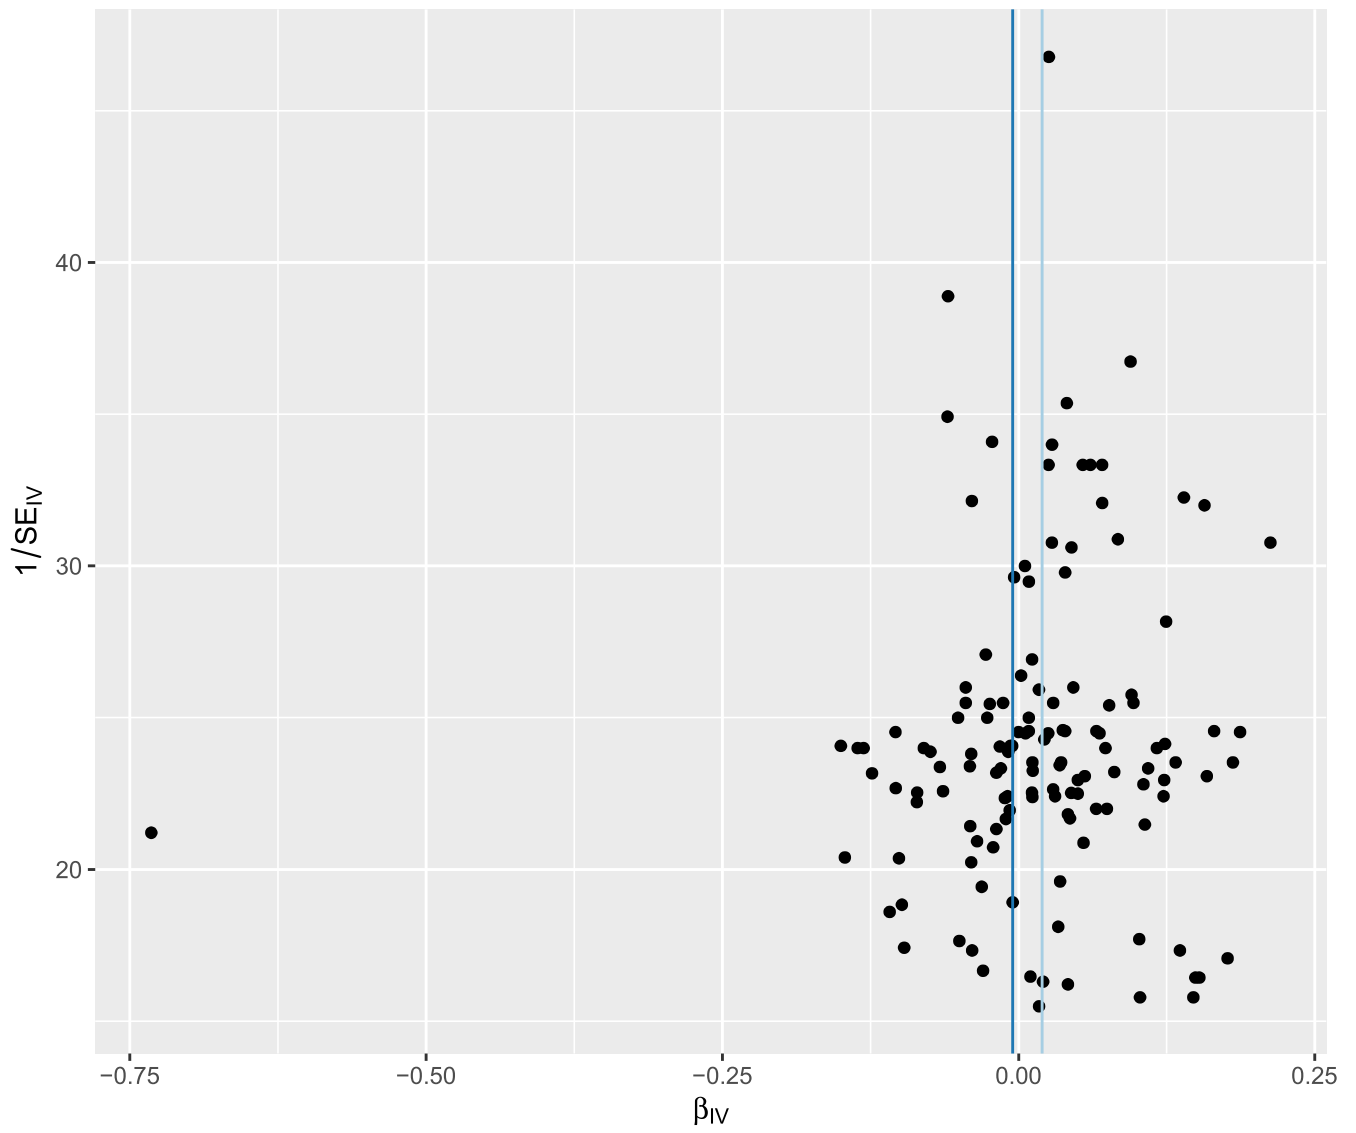

## 3- HDL

MR Test

- Inverse variance weighted
- MR Egger
- Simple mode
- Weighted median
- Weighted mode

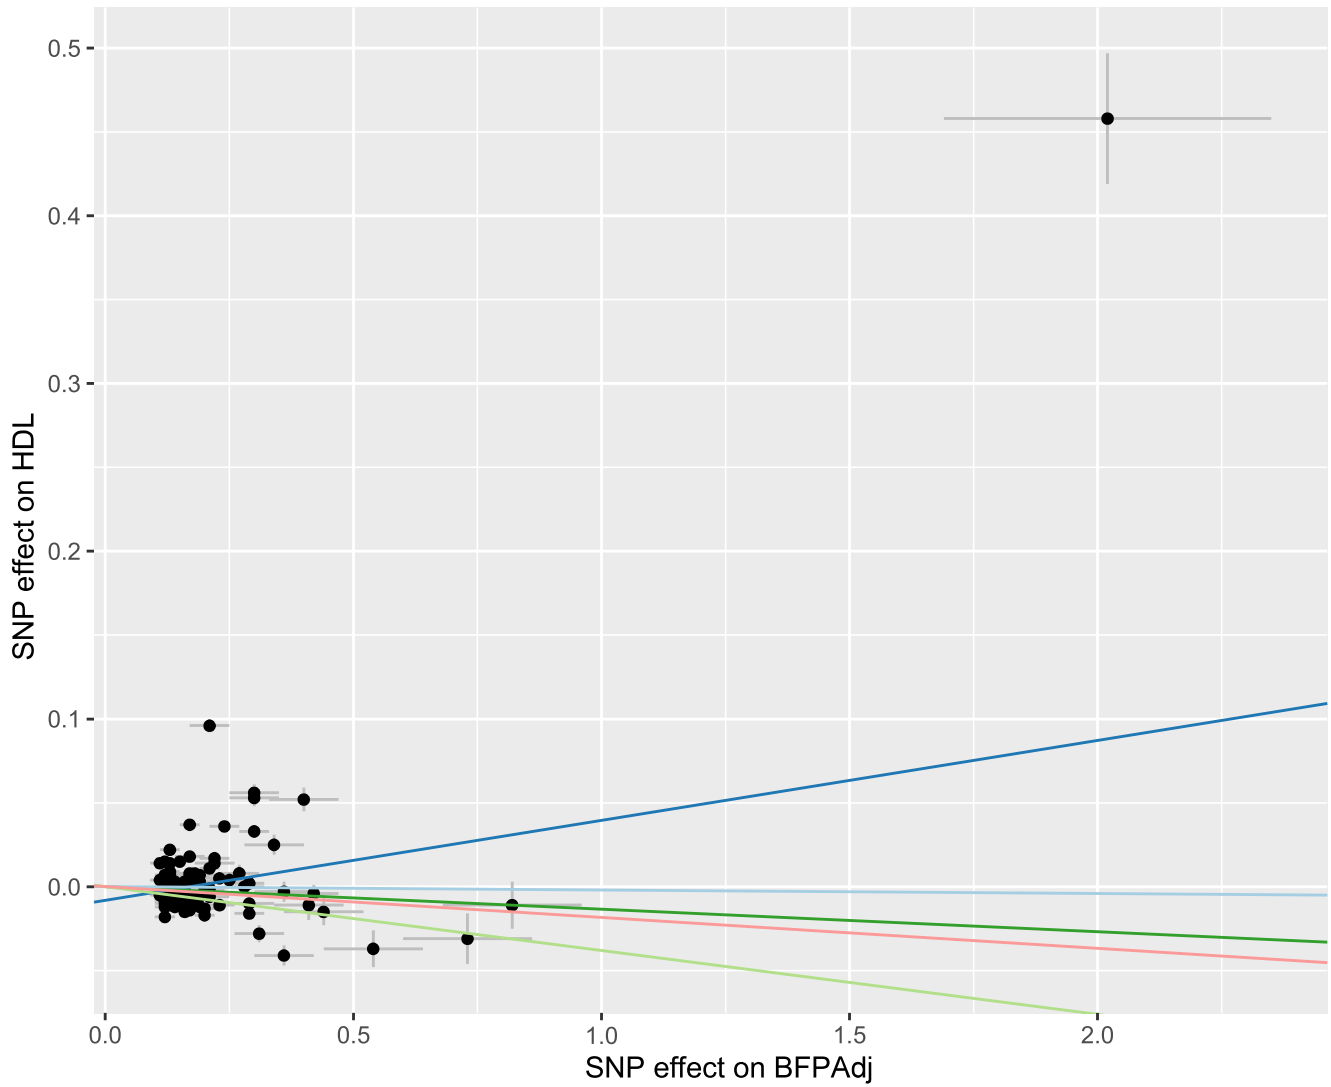

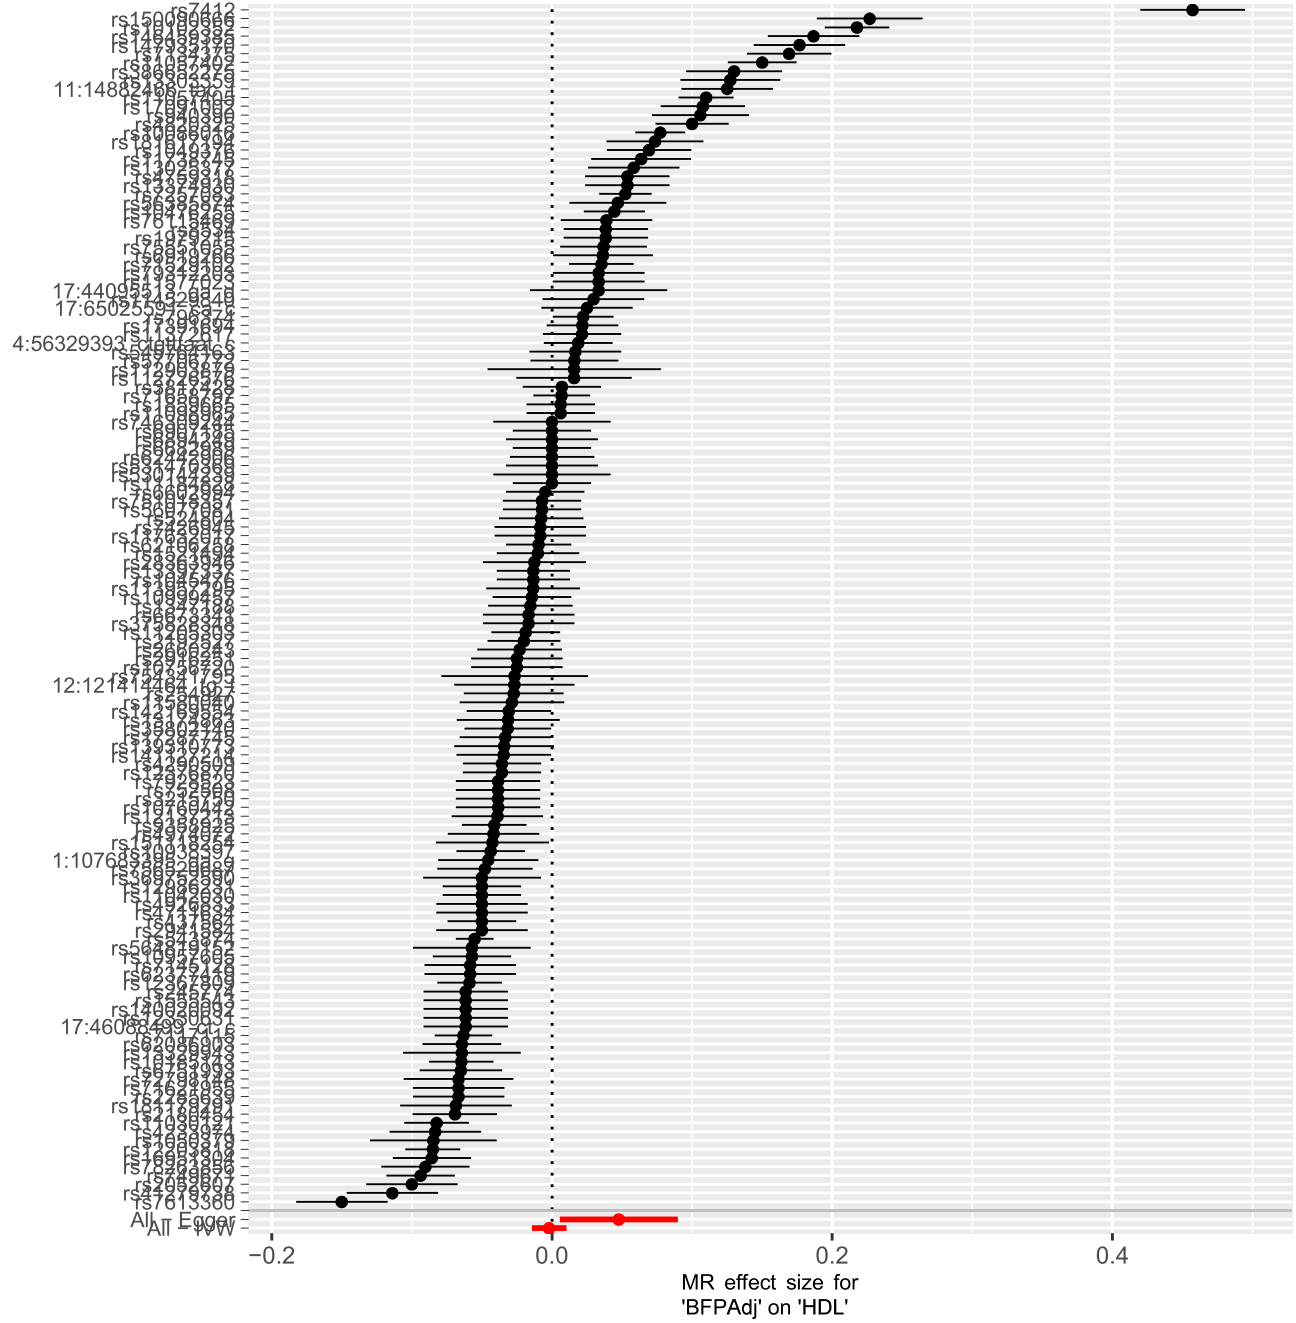

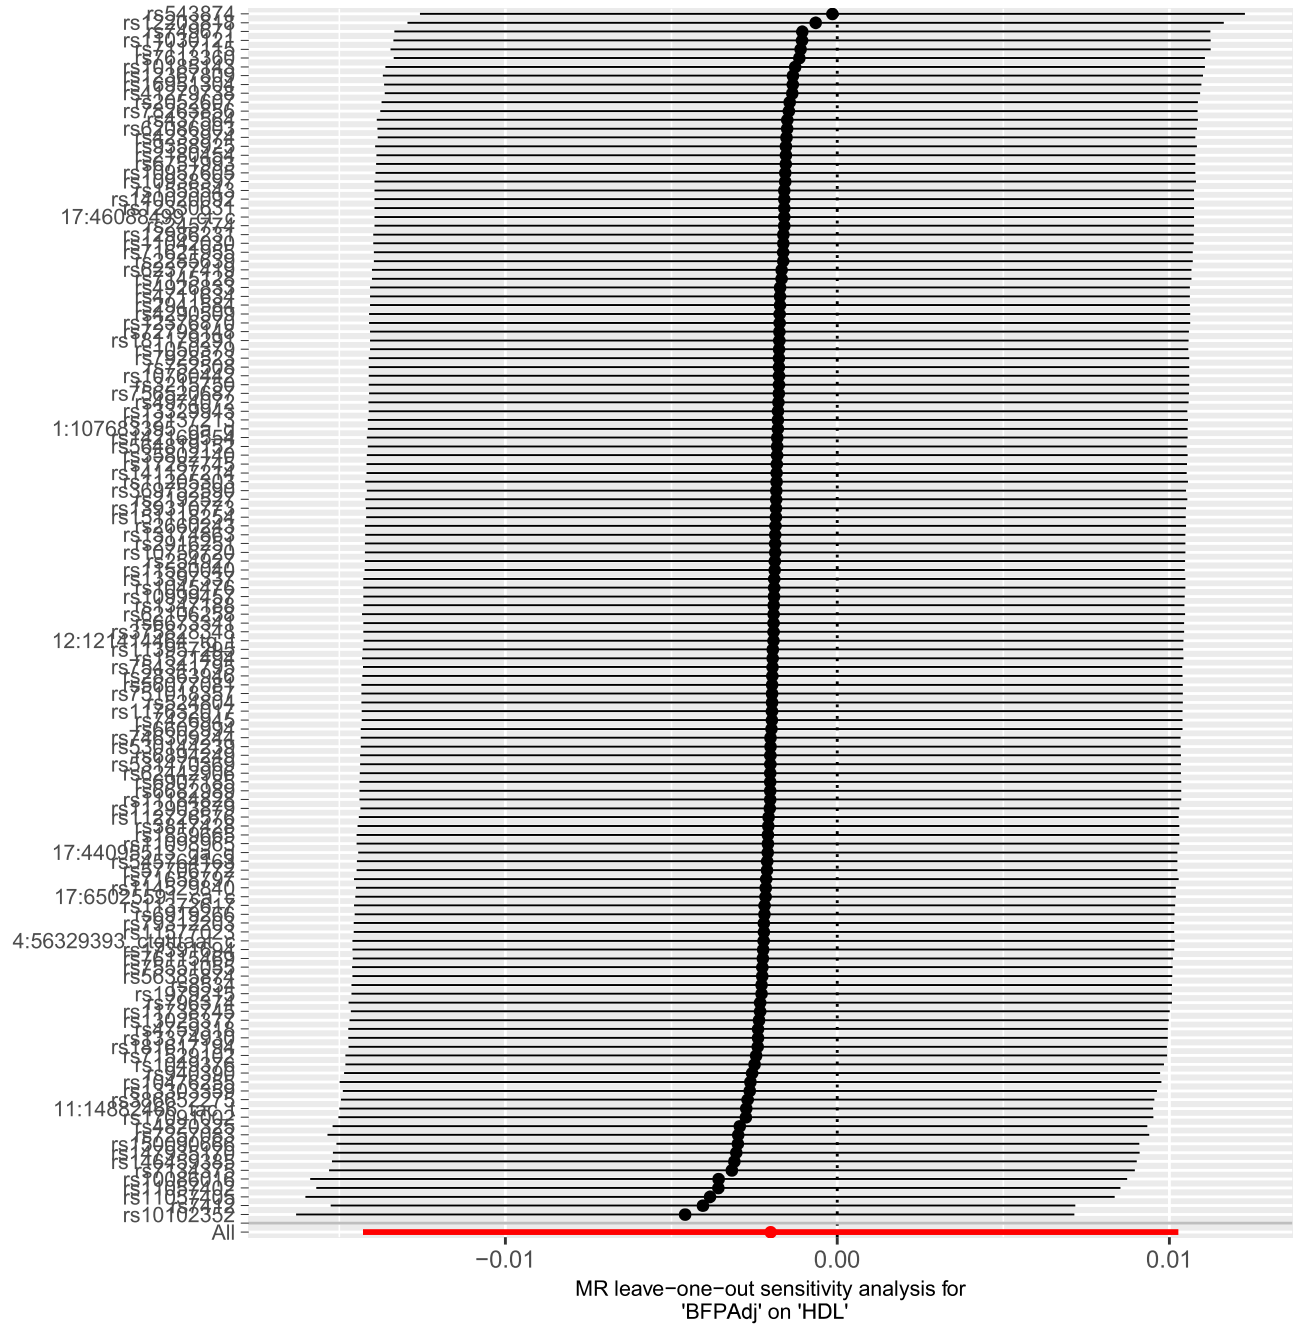

MR Method

- Inverse variance weighted
- MR Egger

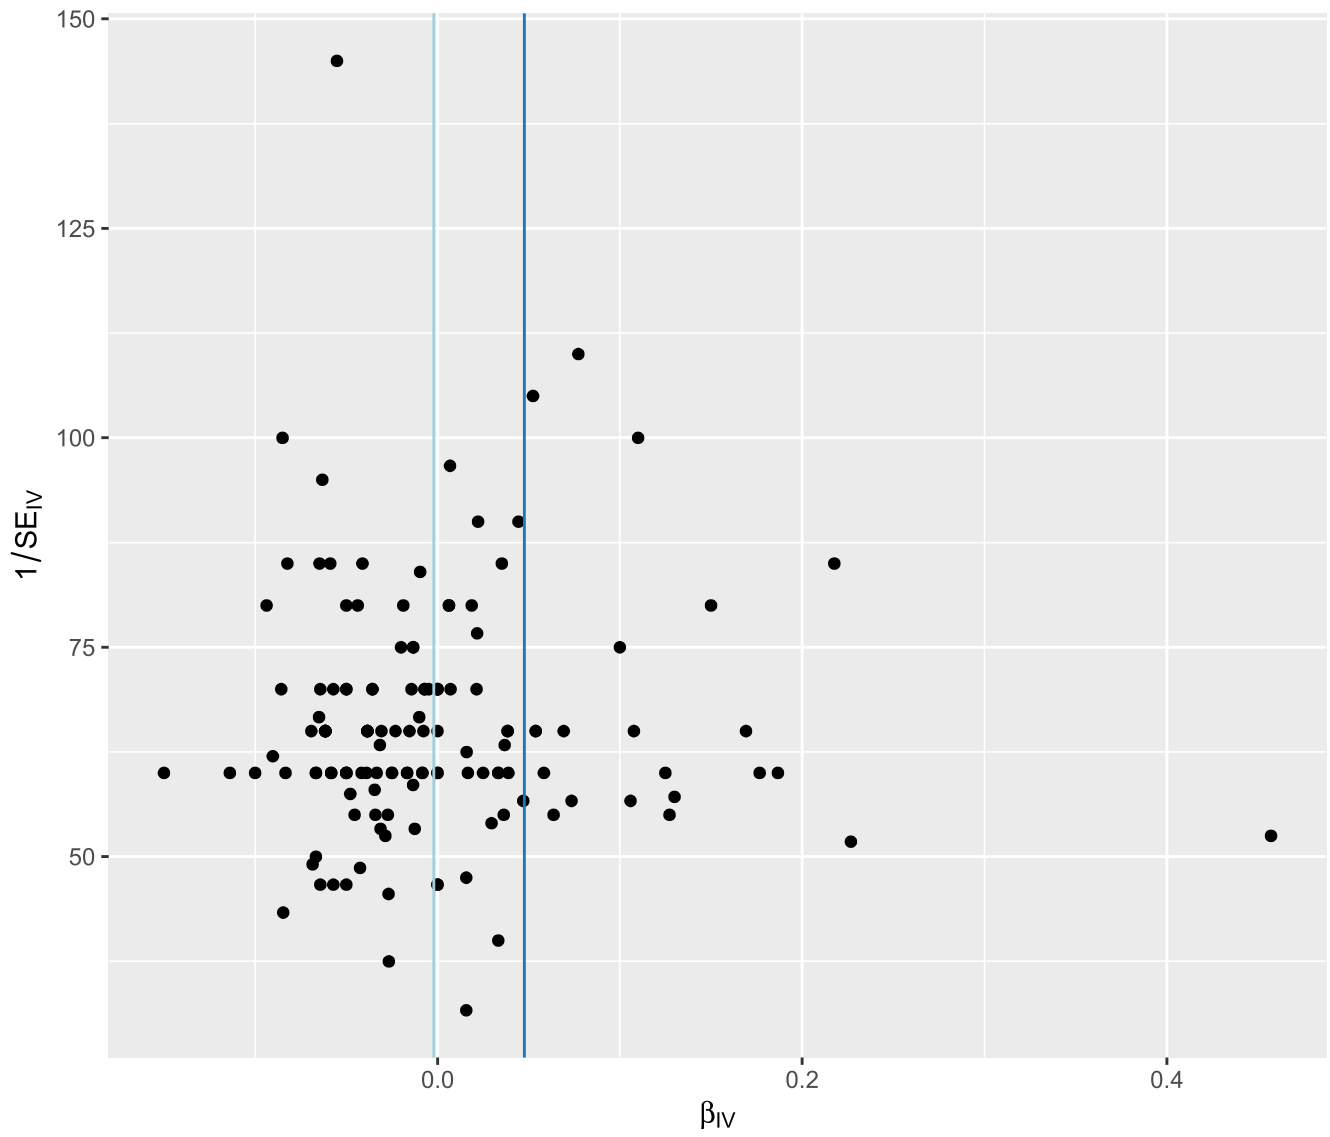

## 4- TG



MR Test

- Inverse variance weighted
- MR Egger
- Simple mode
- Weighted median
- Weighted mode

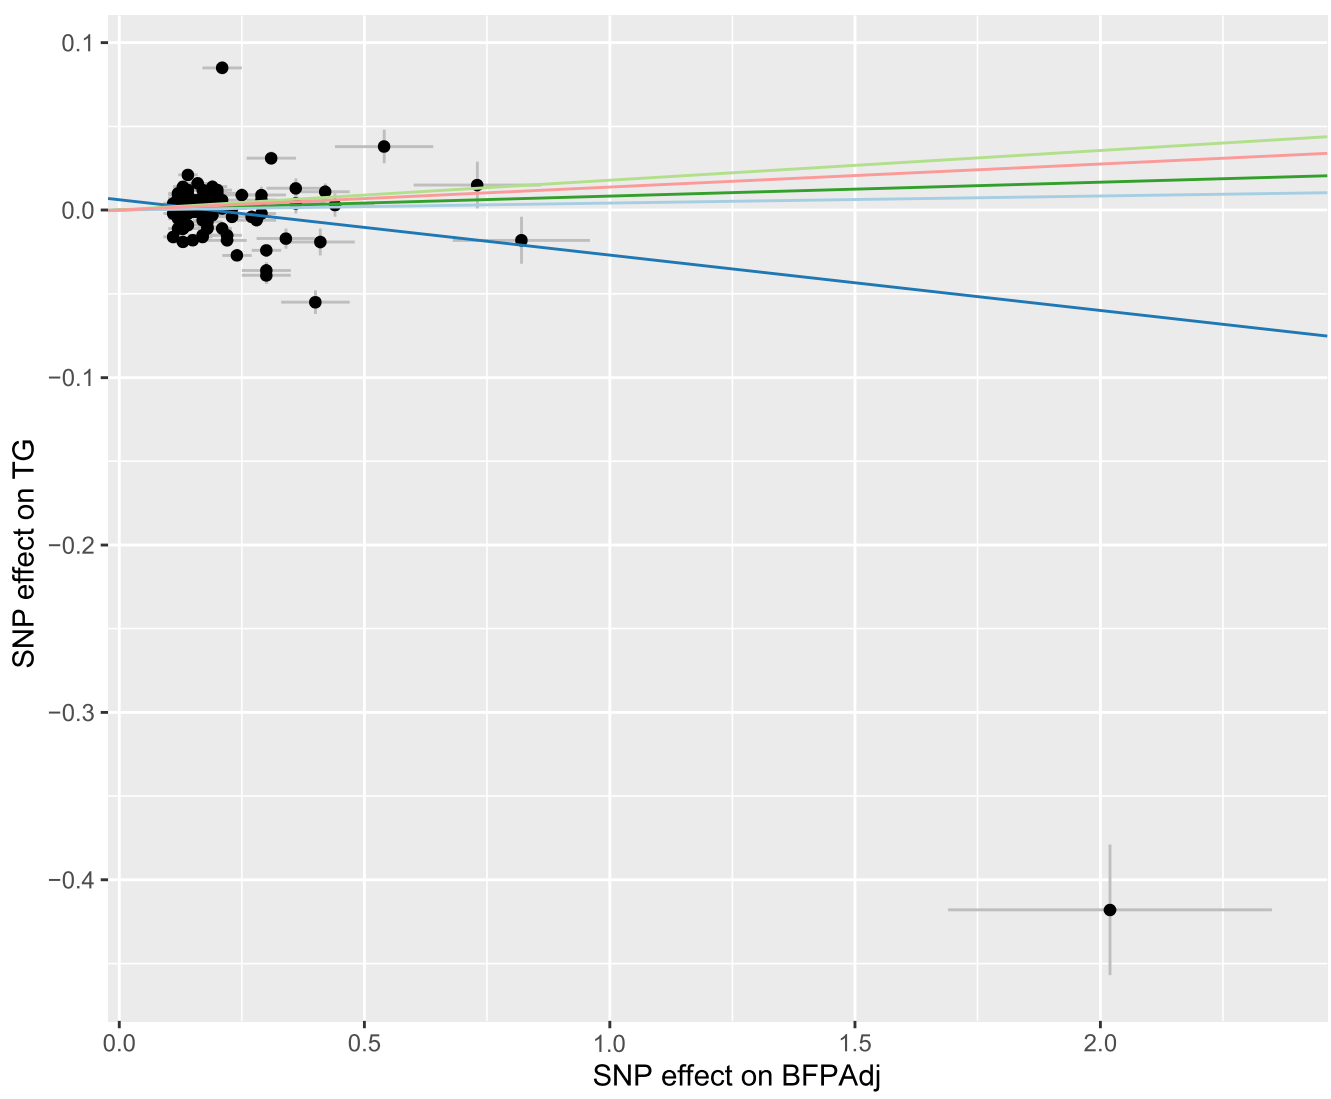

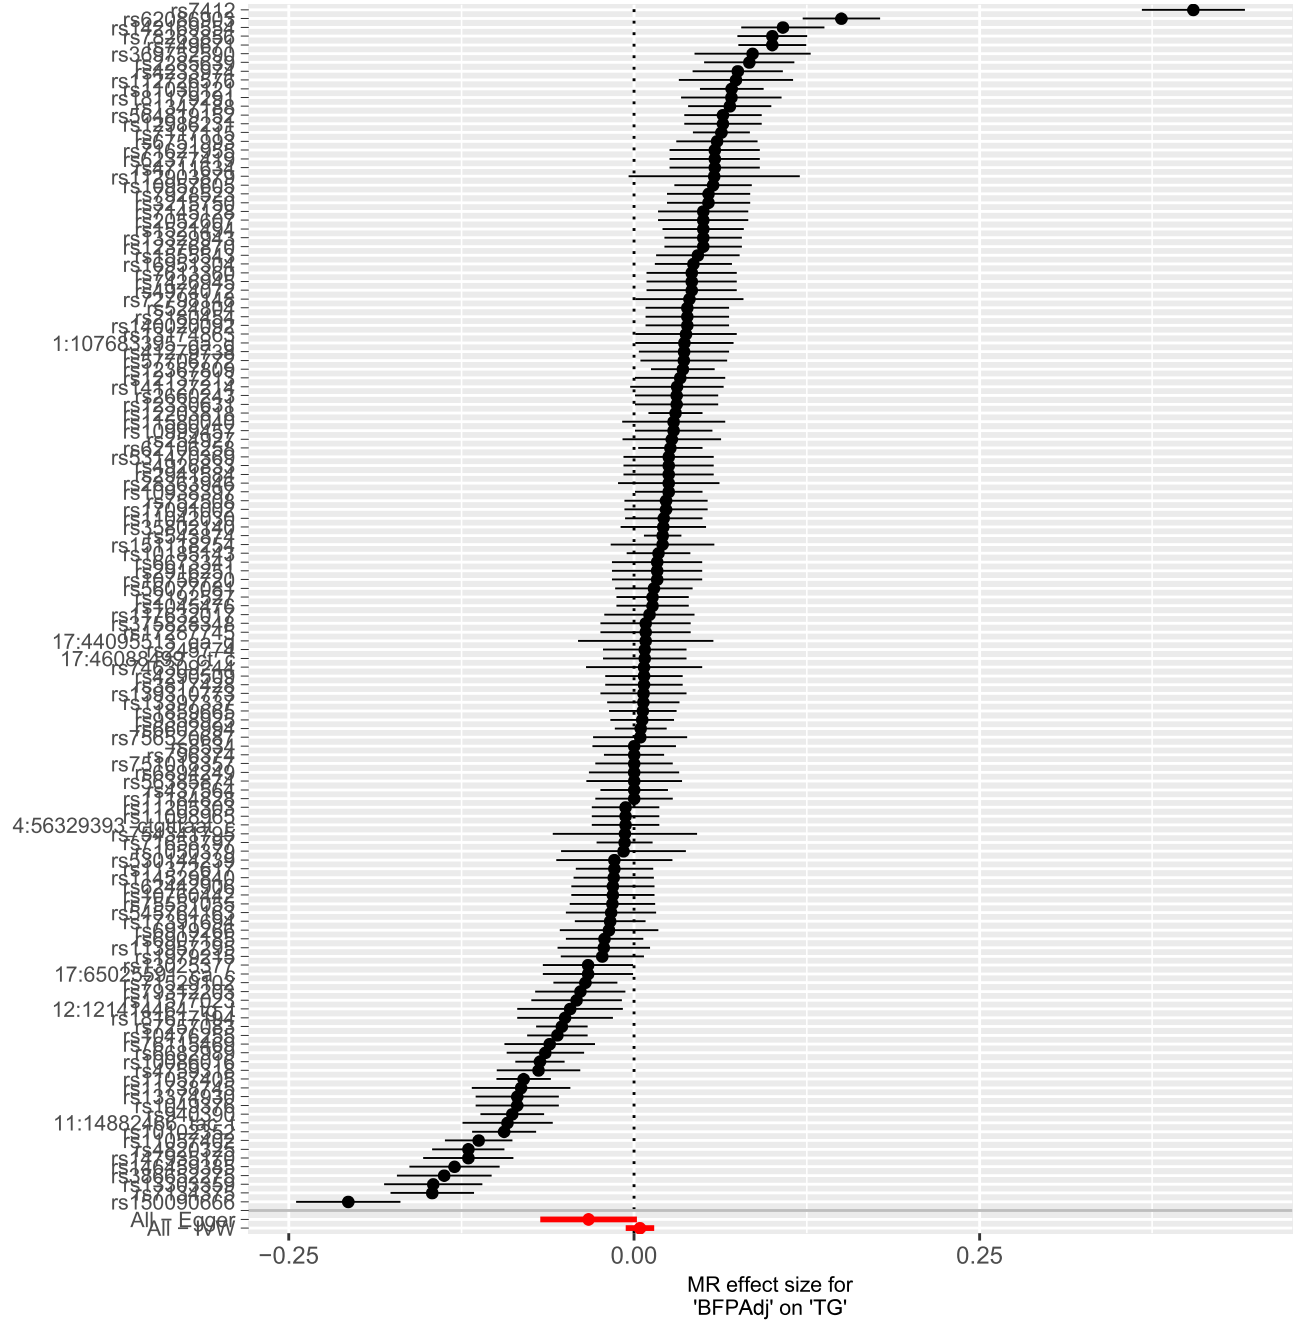

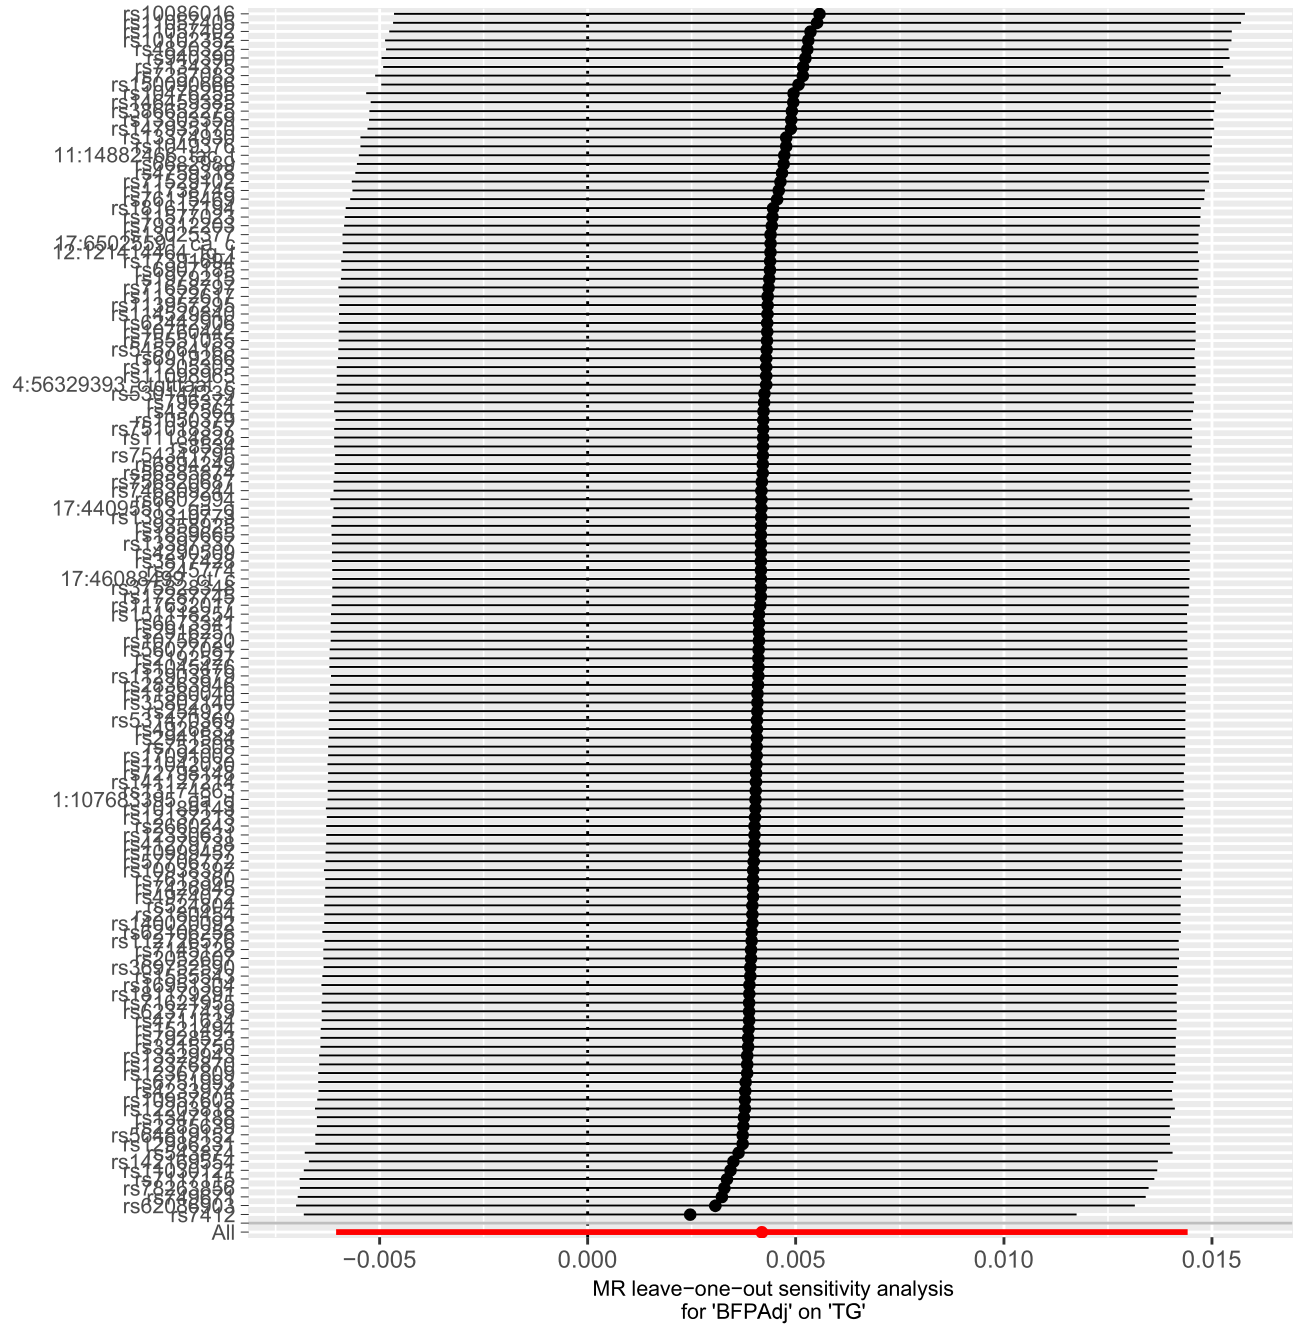

MR Method

- Inverse variance weighted
- MR Egger

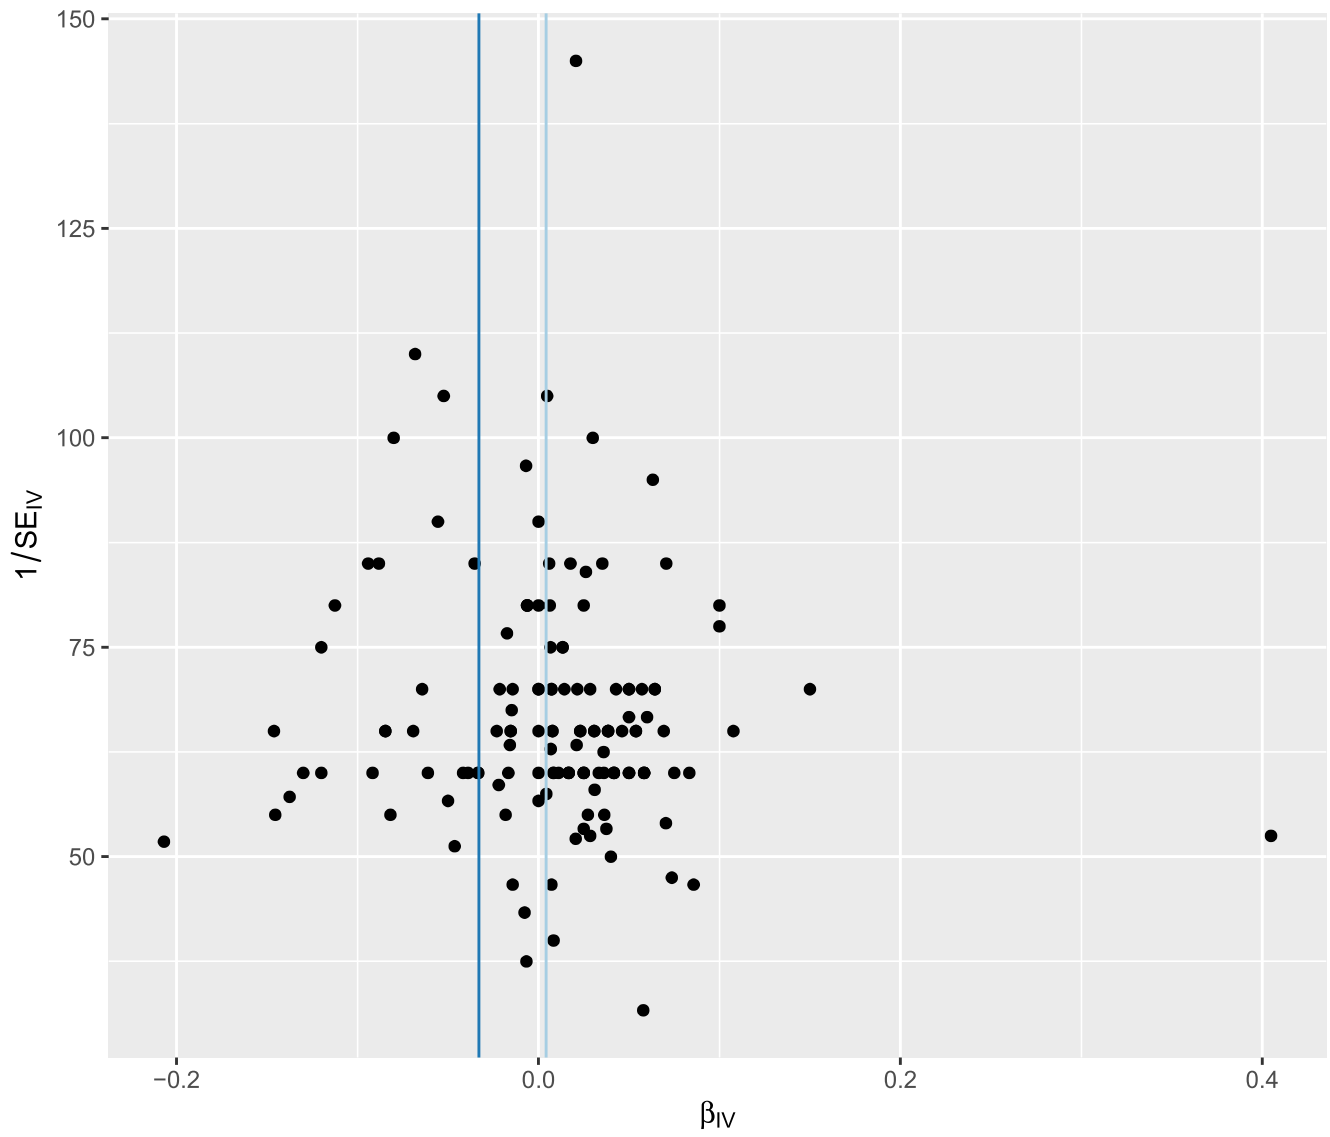

Supplement: DataSheet_1.pdf [file DataSheet_1.pdf]
